# Supplementary material for: A “phosphorus derivative” of aziridines: on the importance of ring strain energy and three heteropolar bonds in azaphosphiridines
Source: Royal Society of Chemistry journal article supplement (doi:10.1039/d4dt03117b), 2025-01-01
Supplement: d4dt03117b1.pdf [file d4dt03117b1.pdf]

## Supporting Information

### A “phosphorus derivative” of aziridines: on the importance of ring strain energy and three heteropolar bonds in azaphosphiridines

Antonio García Alcaraz <sup>1</sup>, Alicia Rey Planells <sup>1,2</sup>, Arturo Espinosa Ferao <sup>1,\*</sup> and Rainer Streubel <sup>3,\*</sup>

<sup>1</sup> Departamento de Química Orgánica. Facultad de Química. Universidad de Murcia. Campus de Espinardo. 30071 Murcia, Spain. [artuesp@um.es](mailto:artuesp@um.es)

<sup>2</sup> Faculty of Pharmacy. University of Castilla-La Mancha. Calle Almansa 14 – Edif. Bioincubadora. 02008 Albacete, Spain.

<sup>3</sup> Institut für Anorganische Chemie. Rheinische Friedrich-Wilhelms-Universität Bonn, Gerhard-Domagk-Str. 1, 53121 Bonn, Germany. [r.streubel@uni-bonn.de](mailto:r.streubel@uni-bonn.de)

#### Table of contents

|                                                                                                                          |    |
|--------------------------------------------------------------------------------------------------------------------------|----|
| <b>Figure S1.</b> Plot of RSEs (kcal/mol) vs C-N (a), N-P (b) and P-C (c) bond distances                                 | S2 |
| <b>Figure S2.</b> Plot of RSEs (kcal/mol) versus C-N-P (a), N-P-C (b) and P-C-N (c) bond angles                          | S3 |
| <b>Figure S3.</b> ISCP of $\sigma_{zz}$ (ppm) parallel to the ring plane at $\pm 2$ Å (average) for cyclopropenide anion | S4 |
| <b>Figure S4.</b> Plot of the RSEs versus $G(r)/\rho(r)_{RCP}$                                                           | S4 |
| <b>Figure S5.</b> Computed $\sigma^*(P-N)$ natural bond orbital                                                          | S5 |
| <b>Figure S6.</b> Computed zero-point corrected energy profile for the P-C bond cleavage reactions                       | S5 |
| <b>Calculated structures.</b> Cartesian coordinates and energies for all computed molecules                              | S6 |

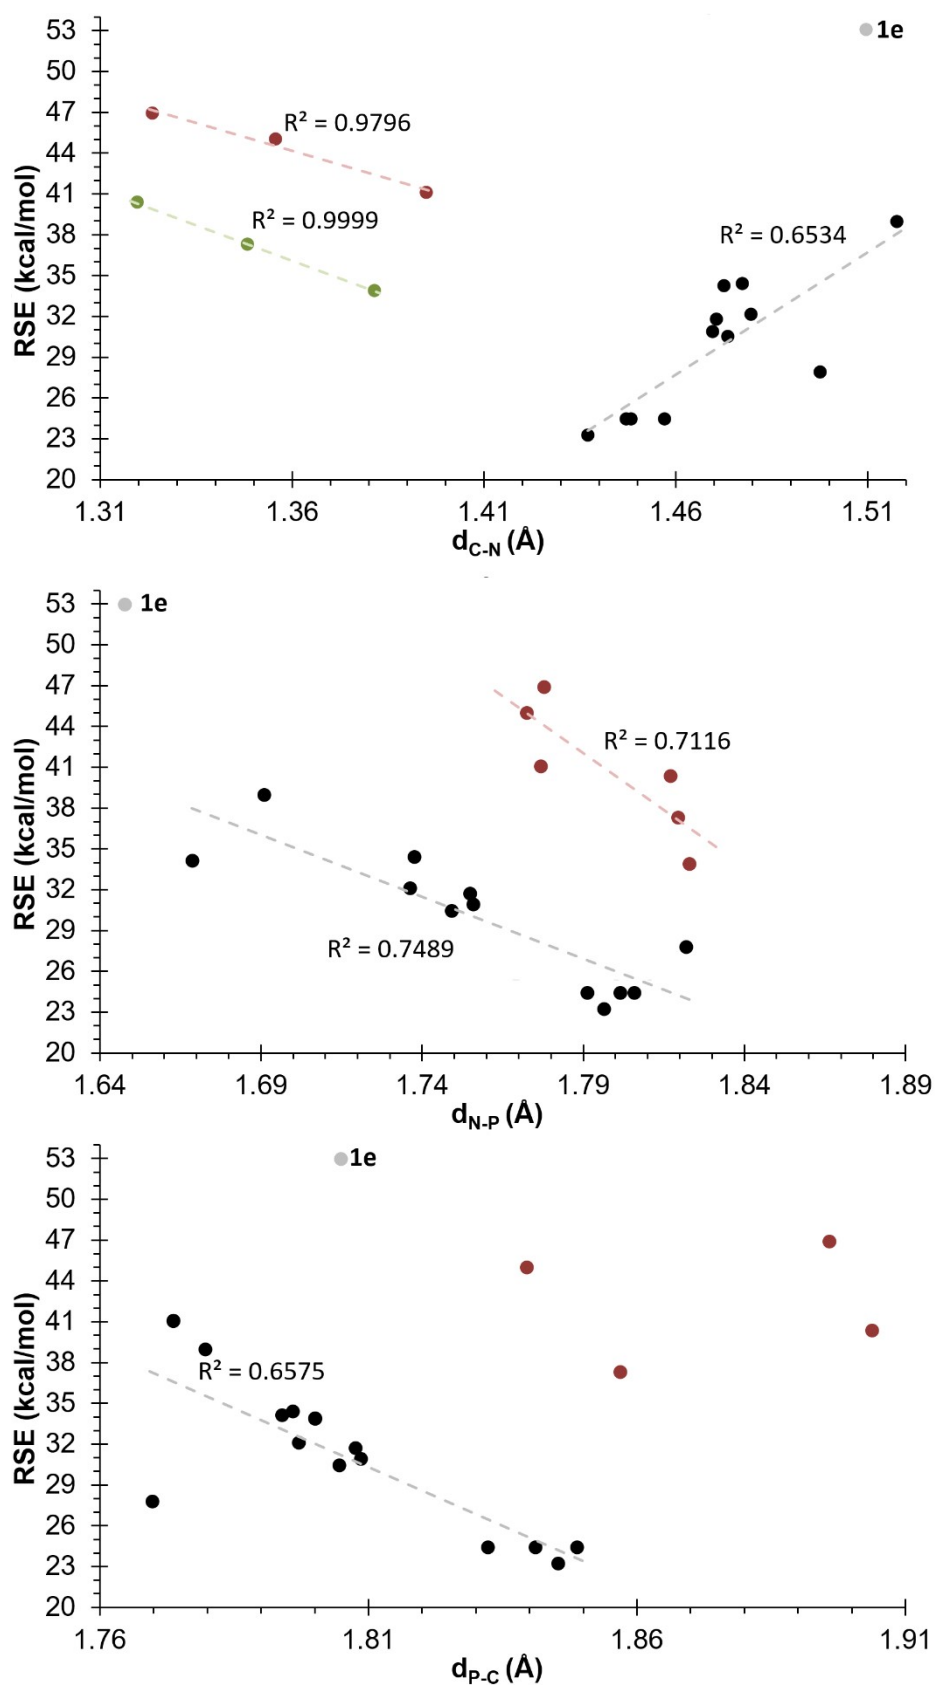

**Figure S1.** Plot of RSEs (kcal/mol) versus endocyclic C-N (a), N-P (b) and P-C (c) bond distances for the azaphosphiridines. Compounds excluded from the general correlation are uncomplexed (green) and complexed (red) species with exocyclic double bond.

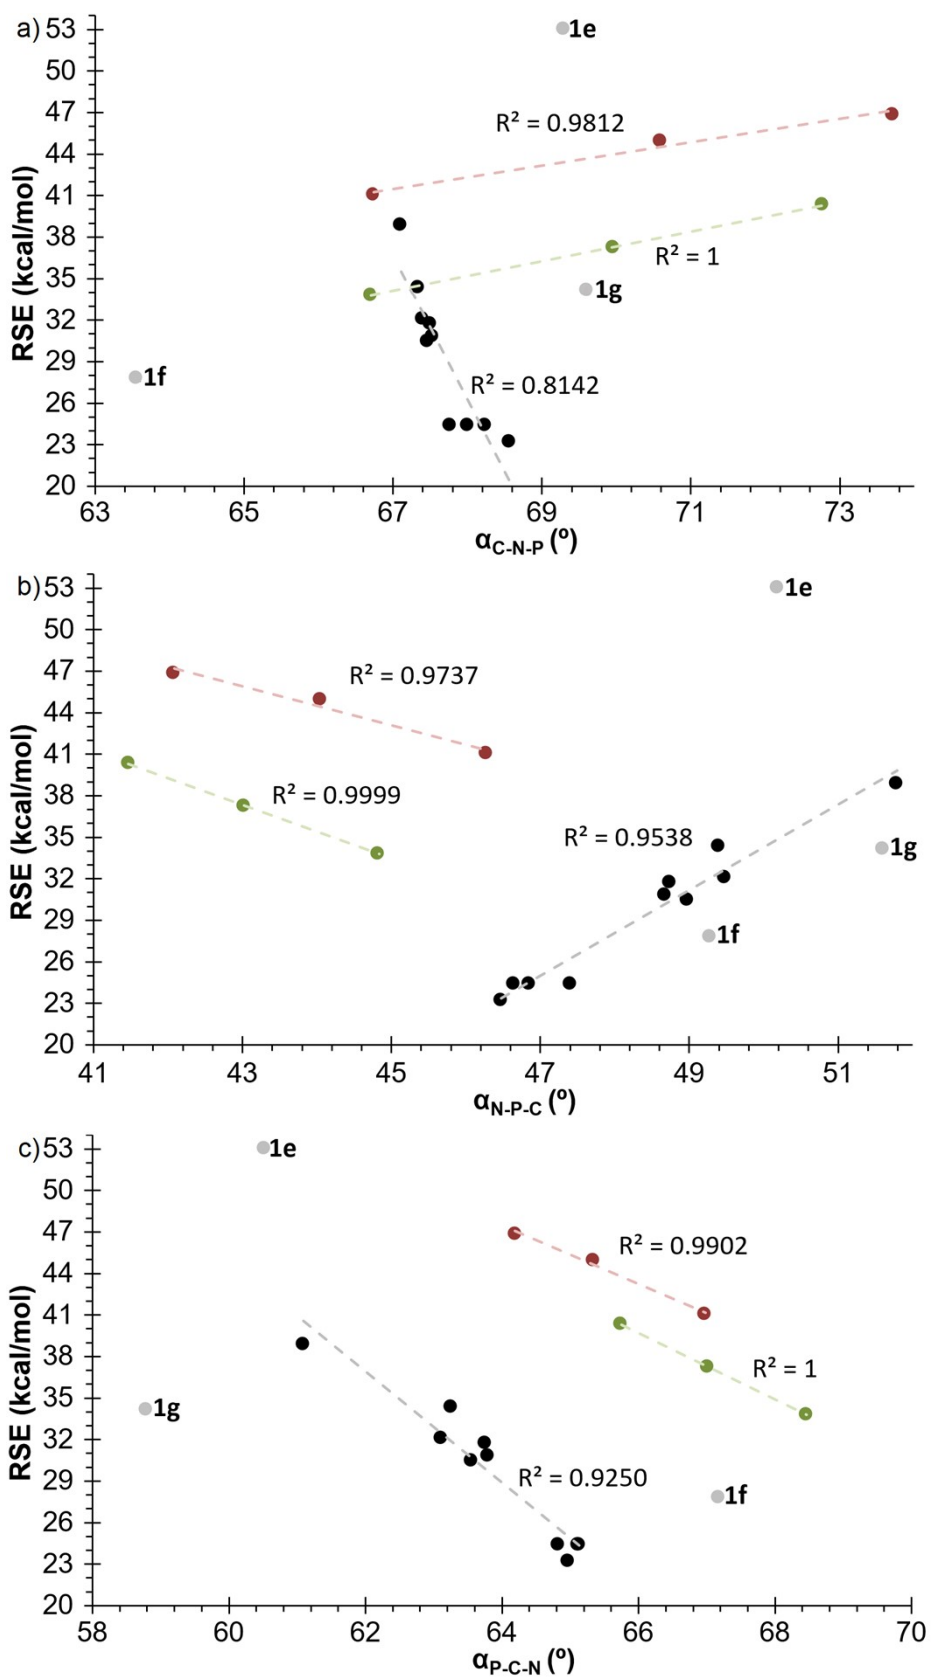

**Figure S2.** Plot of RSEs (kcal/mol) versus endocyclic C-N-P (a), N-P-C (b) and P-C-N (c) bond angles for the azaphosphiridines. Compounds excluded from the general correlation are uncomplexed (green) and complexed (red) species with exocyclic double bond.

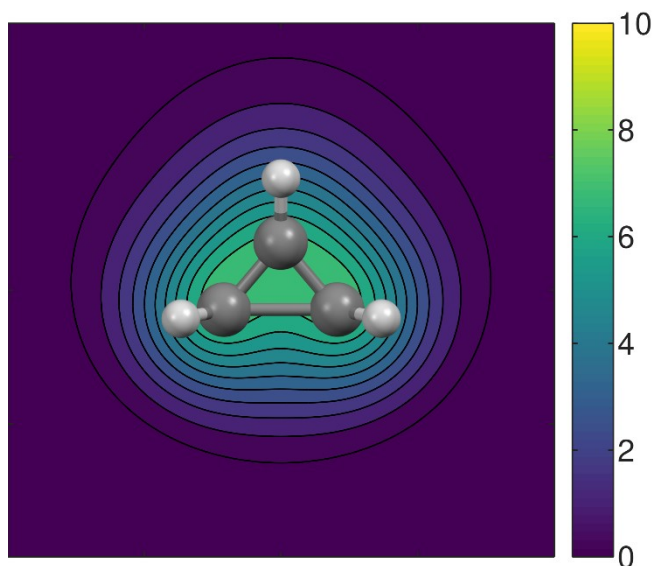

**Figure S3.** ISCP of  $\sigma_{zz}$  (ppm) in the plane parallel to the xy (ring) plane located at  $\pm 2 \text{ \AA}$  (average) for cyclopropenide anion.

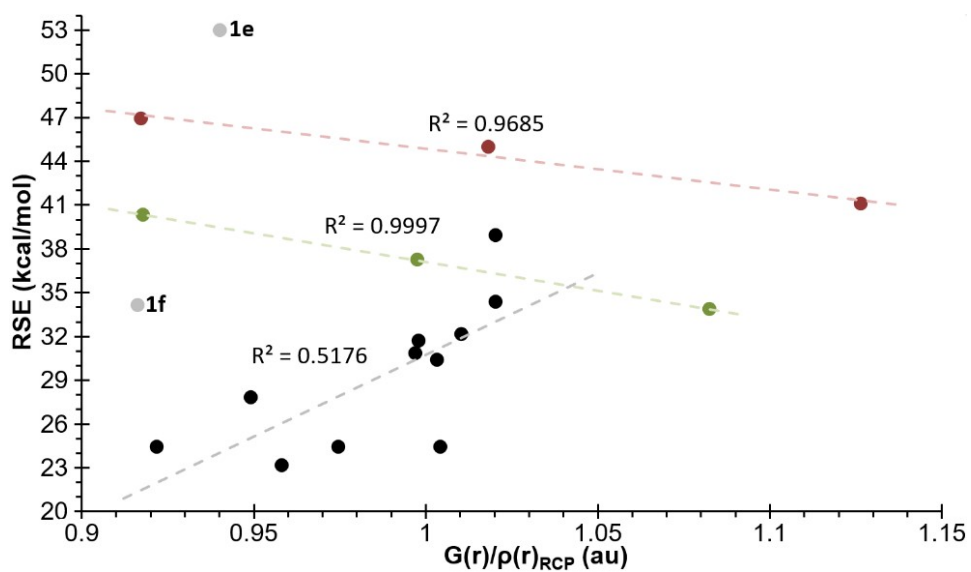

**Figure S4.** Plot of the RSEs versus  $G(r)/\rho(r)_{RCP}$  for the azaphosphiridines **1**. Compounds excluded from the general correlation are uncomplexed (green) and complexed (red) species with exocyclic double bond.

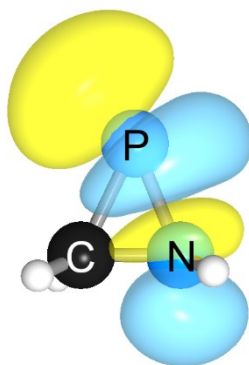

**Figure S5.** Computed (B3LYP/def2-TZVPP//B3LYP-D4/def2-TZVP)  $\sigma^*(\text{P-N})$  natural bond orbital (isovalue 0.032 a.u.)

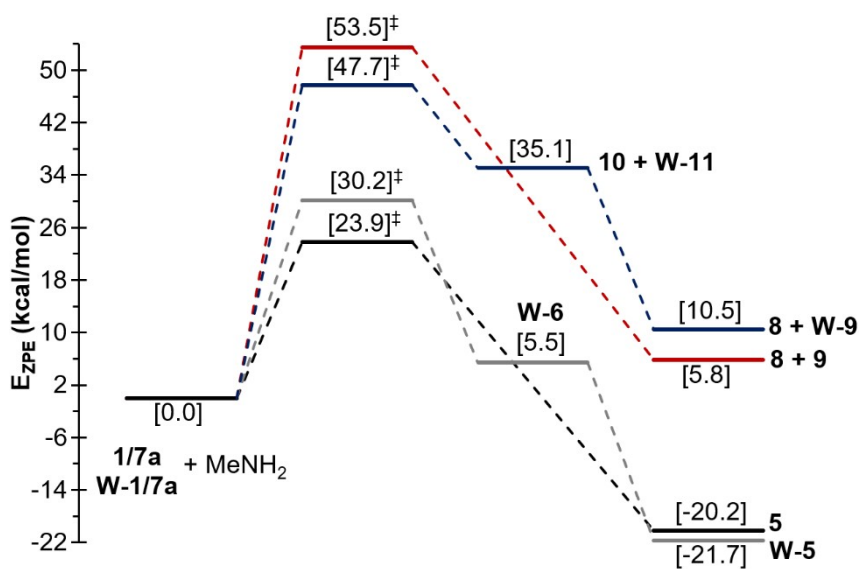

**Figure S6.** Computed (DLPNO-CCSD(T)/def2-TZVPP) zero-point corrected energy profile for the  $\text{MeNH}_2$ -mediated P-C bond cleavage reactions depicted in Scheme 3: **1a** (black); **W-1a** (grey); **7a** (red); **W-7** (blue).

## Calculated structures

Cartesian coordinates (in Å). Unless otherwise stated G correction (G-E) and ZPE (in hartrees) for TSs and minima were computed at B97-3c, electronic energies (in hartrees) are quoted using the default DLPNO-CCSD(T)/def2-QZVPP(ecp) level.

**1a** E = -435.969838470154 au  
ZPE = 0.05151348 au  
G<sub>corr</sub> = 0.02616598 au

|   |                   |                   |                   |
|---|-------------------|-------------------|-------------------|
| C | -2.39644304088927 | 0.25900448930267  | 0.03192364361377  |
| H | -2.96739184426344 | -0.03352021129884 | -0.83884258351710 |
| H | -2.76919103862742 | -0.14589160242036 | 0.96649425457674  |
| P | -1.71361865924691 | 1.96709087715978  | 0.11205868852180  |
| H | -1.87135326401171 | 2.30304105643132  | -1.26429789309328 |
| N | -0.96726923041145 | 0.35469234883264  | -0.18605749198390 |
| H | -0.45229690254978 | 0.07430445199279  | 0.64280756188197  |

**1b** E = -475.200894576208 au  
ZPE = 0.07883535 au  
G<sub>corr</sub> = 0.05140868 au

|   |                   |                   |                   |
|---|-------------------|-------------------|-------------------|
| C | -2.35922896141590 | 0.25116984947588  | 0.03371844934378  |
| H | -2.87199204682974 | -0.10580021706927 | -0.84994857535971 |
| H | -2.74569756152309 | -0.14417509575404 | 0.97008299806345  |
| P | -1.79528643620219 | 2.00705508138020  | 0.10189133864327  |
| H | -1.89242615971924 | 2.29642516382555  | -1.29067535199789 |
| N | -0.93991728847814 | 0.43968817159234  | -0.09532556901919 |
| C | -0.14289461099878 | 0.01460169251522  | 1.04748738357155  |
| H | 0.01558786974831  | -1.06189528703810 | 0.97727991530771  |
| H | 0.82531991599896  | 0.50797807090961  | 1.01016364482444  |
| H | -0.60005709058017 | 0.22603049016261  | 2.02352191662259  |

**1c** E = -475.214387829414 au  
ZPE = 0.07943959 au  
G<sub>corr</sub> = 0.05195927 au

|   |                   |                   |                   |
|---|-------------------|-------------------|-------------------|
| C | -2.42502790979949 | 0.24871067697653  | 0.04206624957341  |
| H | -2.96601753180366 | 0.01119546519240  | -0.86721252890825 |
| P | -1.71622568895073 | 1.95424359624999  | 0.12923526793412  |
| H | -1.85759730741761 | 2.30851538112121  | -1.24478561316663 |
| N | -0.99639057971318 | 0.32660901471136  | -0.17730811670230 |
| H | -0.49267874345645 | 0.03884587389415  | 0.65821173544339  |
| C | -2.97344093067348 | -0.38242042964899 | 1.28613406454351  |

|   |                   |                   |                  |
|---|-------------------|-------------------|------------------|
| H | -4.03521542554377 | -0.16951910116330 | 1.39827879800577 |
| H | -2.84919797466110 | -1.46676330159784 | 1.25194353538896 |
| H | -2.46356510798050 | -0.01327783573553 | 2.17630133788803 |

**1d** E = -475.220187425988 au  
ZPE = 0.08015475 au  
G<sub>corr</sub> = 0.05228810 au

|   |                   |                   |                   |
|---|-------------------|-------------------|-------------------|
| C | -2.36542833573585 | 0.28060826201531  | -0.06095651989376 |
| H | -2.84783127331956 | -0.00442410355793 | -0.98739234788665 |
| H | -2.75961319247341 | -0.22314331269394 | 0.81487215144607  |
| P | -1.82695101302707 | 2.01776713324845  | 0.16298304032707  |
| N | -0.92927430852002 | 0.50374924393688  | -0.17083423161990 |
| H | -0.44309251809606 | 0.19494639993223  | 0.66450173506952  |
| C | -1.92763195245944 | 2.68764320472614  | -1.56072478376990 |
| H | -2.87458177905053 | 3.20879482346603  | -1.69527009663065 |
| H | -1.12337138314839 | 3.40347911363972  | -1.72049402160728 |
| H | -1.84184900416964 | 1.89561940528711  | -2.29980400543452 |

**1e** E = -436.327721745194 au  
ZPE = 0.06091330 au  
G<sub>corr</sub> = 0.03541425 au

|   |                   |                   |                   |
|---|-------------------|-------------------|-------------------|
| C | -0.08382603109948 | -0.05295695867710 | 0.04458631108650  |
| N | -0.04783093465993 | 0.00163019533928  | -1.42711506465316 |
| P | 1.49810231355290  | -0.06262976007307 | -0.80065602305987 |
| H | -0.44785874716977 | -0.98431179864172 | 0.45660475644503  |
| H | -0.31316493870917 | 0.84262099444176  | 0.61405356563717  |
| H | -0.40552119865407 | 0.82118561302424  | -1.90460036605848 |
| H | 2.23627679780949  | -1.19436028557270 | -1.15917693824060 |
| H | 2.28059079893002  | 1.09368514015929  | -0.70683879115658 |

TS(**1e**→**1a**·H<sup>+</sup>) E = -436.276648250682 au  
ZPE = 0.05886082 au  
G<sub>corr</sub> = 0.03317140 au  
 $\bar{\nu}$  = -1077.38 cm<sup>-1</sup>

|   |                   |                   |                   |
|---|-------------------|-------------------|-------------------|
| C | -0.02462546793134 | -0.07872032678849 | -0.05670261937781 |
| N | 0.10916766410496  | 0.29154445109391  | -1.40337540036143 |
| P | 1.86465248785222  | 0.09156187242595  | -0.25847646619112 |
| H | -0.28323393487371 | -1.11937593103187 | 0.09052649505186  |
| H | -0.44089550134105 | 0.62982854908288  | 0.64946654103216  |
| H | -0.08776671537669 | 1.29745861209833  | -1.49463130367814 |
| H | 2.05396026933293  | -1.22212126274299 | -0.75758295619711 |
| H | 1.52550925823256  | 0.57468717586226  | -1.65236684027831 |

**1a·H<sup>+</sup>** E = -436.368778885003 au  
 ZPE = 0.06573794 au  
 G<sub>corr</sub> = 0.04021506 au

|   |                   |                   |                   |
|---|-------------------|-------------------|-------------------|
| C | 0.04258257648396  | -0.08233382681010 | 0.02535502061651  |
| N | -0.04350982006312 | 0.02607438851470  | -1.44421495699513 |
| P | 1.69254239022082  | 0.11008552005353  | -0.77636308150031 |
| H | -0.26998580150632 | -1.03550749331389 | 0.42164426056579  |
| H | -0.34559216422612 | 0.77950700361758  | 0.54720499999353  |
| H | -0.43372452662621 | 0.87945441356661  | -1.82895669510627 |
| H | 1.88360689723539  | -1.28285277845860 | -0.97046930138910 |
| H | -0.34337444151840 | -0.79396015716983 | -1.95898823618501 |

**1f** E = -437.106309045102 au  
 ZPE = 0.06784289 au  
 G<sub>corr</sub> = 0.04192556 au

|   |                   |                   |                   |
|---|-------------------|-------------------|-------------------|
| C | -3.28610611937425 | -0.18151222025792 | 1.40395309198602  |
| H | -3.73743886464030 | -0.90662211458741 | 0.73052285004778  |
| H | -3.95543116506217 | 0.04855031253555  | 2.23417951004099  |
| N | -1.82040630733580 | -0.33572208169024 | 1.67267560844839  |
| H | -1.62987691619424 | -0.35210648696063 | 2.66978265132874  |
| P | -2.33302285169469 | 1.19063198252462  | 0.81982071924688  |
| H | -3.13724578953044 | 2.17695641253633  | 0.07723544465018  |
| H | -1.97561076040243 | 2.13047806175190  | 1.81711891937535  |
| H | -1.42597128576566 | 1.00546473414780  | -0.24023104512436 |

**1g** E = -817.022355940067 au  
 ZPE = 0.13930131 au  
 G<sub>corr</sub> = 0.10515797 au

|   |                   |                   |                   |
|---|-------------------|-------------------|-------------------|
| C | 0.02651473923433  | -0.36470556568161 | 0.09430419759627  |
| N | -0.13824747168210 | 0.25949608229539  | -1.27030090462939 |
| P | 1.45931054522900  | 0.11438246257617  | -0.89430301894702 |
| H | -0.40400339741413 | -1.35648111626853 | 0.18928238830549  |
| H | -0.17238387465133 | 0.27207102954747  | 0.95084863481579  |
| H | -0.68646704792372 | 1.09027516912122  | -1.43285685534499 |
| H | 2.00601676529418  | -1.04314902515610 | -1.45935174261548 |
| O | 2.49369090664960  | 0.68976029011628  | 0.30488800359340  |
| O | 2.14666931205332  | 1.24143534673667  | -2.04266678726318 |
| C | 3.42641614623424  | 1.58239995771622  | -0.17753477469128 |
| C | 3.21867023967946  | 1.88933744696273  | -1.51892304599217 |
| C | 4.04260739241401  | 2.78504223978614  | -2.16998634154110 |
| C | 5.08531953213447  | 3.36037796437608  | -1.44377784358336 |
| C | 5.28620214310637  | 3.04899061680658  | -0.10632917444345 |
| C | 4.44651284720475  | 2.14811637516267  | 0.55059497635630  |



|   |                  |                  |                   |
|---|------------------|------------------|-------------------|
| H | 3.87749011530776 | 3.02399115977655 | -3.21072979744434 |
| H | 5.74676780468597 | 4.05969294939455 | -1.93652760999976 |
| H | 6.10164116156244 | 3.50511515311713 | 0.43739506576848  |
| H | 4.58635822088127 | 1.89640872361432 | 1.59206540005984  |

**1a<sup>=C</sup>** E = -473.971191461073 au  
ZPE = 0.05521721 au  
G<sub>corr</sub> = 0.02821099 au

|   |                   |                   |                   |
|---|-------------------|-------------------|-------------------|
| N | -1.91312697108647 | -0.38193190767630 | 1.46606975592051  |
| H | -1.54259641900052 | -0.40839290241616 | 2.41105669452132  |
| P | -2.28751686504602 | 1.29013582045730  | 0.84350685144172  |
| H | -2.10889610019717 | 0.96260299083750  | -0.53366950643280 |
| C | -3.26739861391969 | -0.13132476361302 | 1.35323933192717  |
| C | -4.44128753449882 | -0.68073359518878 | 1.59912520269143  |
| H | -5.35443906477994 | -0.17254588479842 | 1.33090076761085  |
| H | -4.51855791147134 | -1.65719841760212 | 2.06029934231979  |

**1a<sup>=NH</sup>** E = -490.016314971438 au  
ZPE = 0.04437060 au  
G<sub>corr</sub> = 0.01750295 au

|   |                   |                   |                   |
|---|-------------------|-------------------|-------------------|
| N | -2.14947090166737 | -0.29297530316093 | 1.58132823465075  |
| H | -1.86865948757495 | -0.41338980262118 | 2.54678104523218  |
| P | -2.32287128106096 | 1.35389719818787  | 0.82710089085216  |
| H | -1.92117221983897 | 0.94221060019390  | -0.47854841135584 |
| C | -3.43975014215146 | -0.06416783417434 | 1.26301109935512  |
| N | -4.55787114522860 | -0.61410546503001 | 1.41682196934851  |
| H | -5.30567833247766 | -0.07534682339532 | 0.98962411191712  |

**1a<sup>=O</sup>** E = -509.889243991761 au  
ZPE = 0.03196846 au  
G<sub>corr</sub> = 0.00501272 au

|   |                   |                   |                   |
|---|-------------------|-------------------|-------------------|
| N | -1.94521044599490 | -0.23591544774268 | 1.53939825688012  |
| H | -1.40746824763493 | -0.51251660835125 | 2.35056609834749  |
| P | -2.32077811553267 | 1.37505407440924  | 0.78687260666566  |
| H | -2.03637903282262 | 0.97082047443246  | -0.55366024802333 |
| C | -3.25495369288922 | -0.17020216849327 | 1.39052006767722  |
| O | -4.28581071512565 | -0.72783878425450 | 1.62528771845284  |

**Fe-1a** E = -2151.727358609185 au  
ZPE = 0.08741436 au  
G<sub>corr</sub> = 0.04706231 au

|   |                   |                   |                  |
|---|-------------------|-------------------|------------------|
| C | -2.46356762906679 | -0.28646318219113 | 1.73243446405134 |
| H | -3.04099996181555 | -1.15464506550797 | 1.44486698499880 |

|    |                    |                   |                   |
|----|--------------------|-------------------|-------------------|
| H  | -2.27318612482681  | -0.19963229828125 | 2.79597339223548  |
| N  | -1.38761697586439  | 0.07984055186775  | 0.78466689683738  |
| H  | -0.53198402932154  | 0.36468954603694  | 1.24848446700112  |
| P  | -2.64048060832291  | 1.27917605778481  | 0.86790543341327  |
| H  | -3.36144778137087  | 1.01339519588261  | -0.31096316954910 |
| Fe | -2.55837585822908  | 3.28190959925600  | 1.74226539180908  |
| C  | -2.54174783631306  | 4.89925984501660  | 2.44803073019986  |
| O  | -2.53149440131224  | 5.95309514998881  | 2.90969901773575  |
| C  | -0.823054448478214 | 3.06853626742083  | 2.02425347187450  |
| O  | 0.30654691453359   | 2.89550608983888  | 2.20444708585677  |
| C  | -3.12695538280356  | 3.93862894535114  | 0.18737609372770  |
| O  | -3.49893310954796  | 4.36620839417922  | -0.81848469329567 |
| C  | -3.69594974241403  | 2.71019138429645  | 2.98317622051065  |
| O  | -4.42344075854260  | 2.33497060906022  | 3.79803415259301  |

**Cr-1a** E = -2045.723531943813 au

ZPE = 0.09581824 au

G<sub>corr</sub> = 0.05315318 au

|    |                   |                   |                   |
|----|-------------------|-------------------|-------------------|
| C  | -3.20009477564138 | -0.25758941916357 | 1.40292829465723  |
| H  | -3.58071193399952 | -0.98784857486010 | 0.70180855737146  |
| H  | -3.83005958824386 | -0.09241434981696 | 2.26946953373156  |
| N  | -1.73759207857819 | -0.28675682373465 | 1.58367128890760  |
| H  | -1.46783859099533 | -0.13295006691248 | 2.54933377849496  |
| P  | -2.28957354977101 | 1.18881724761823  | 0.82328516528608  |
| H  | -1.98650080567199 | 0.90506715422660  | -0.52504443876890 |
| Cr | -2.29552293666690 | 3.30528987940693  | 1.71780547655090  |
| C  | -0.41403250372348 | 3.30641912828328  | 1.71941055399653  |
| O  | 0.73717155382100  | 3.31906456695335  | 1.72880611730476  |
| C  | -2.29469003199805 | 4.02076297536265  | -0.02039636292431 |
| O  | -2.29337918995373 | 4.45472770068090  | -1.08690133120231 |
| C  | -4.17372510710872 | 3.27077961184357  | 1.71414457672915  |
| O  | -5.32485933160519 | 3.24133227548773  | 1.71726206421470  |
| C  | -2.30775414681031 | 5.01338199644315  | 2.44317250280986  |
| O  | -2.31611392208114 | 6.07367254783185  | 2.89509982483046  |
| C  | -2.29331559048931 | 2.53248518264417  | 3.42181658790961  |
| O  | -2.29022727048283 | 2.02581433770532  | 4.45885601010063  |

**Mo-1a** E = -1070.013331083963 au

ZPE = 0.09379459 au

G<sub>corr</sub> = 0.04998747 au

|   |                   |                   |                  |
|---|-------------------|-------------------|------------------|
| C | -3.21222671082498 | -0.35717817955566 | 1.33801591066047 |
| H | -3.60859967833660 | -1.07803859017849 | 0.63589655917558 |
| H | -3.82422416330398 | -0.19915848706336 | 2.21851966045152 |
| N | -1.74981418119620 | -0.38701515144076 | 1.48317129861982 |

|    |                   |                   |                   |
|----|-------------------|-------------------|-------------------|
| H  | -1.45987703499252 | -0.22516162140130 | 2.44182638430478  |
| P  | -2.32034484476128 | 1.09858623741461  | 0.74053013201191  |
| H  | -2.05821741930238 | 0.81128788764573  | -0.61548539994310 |
| C  | -0.25094780252485 | 3.29309400368299  | 1.80610455363787  |
| O  | 0.89822909431794  | 3.27310208991151  | 1.84897361536428  |
| C  | -2.21353006145368 | 4.17355373809629  | -0.11520058019846 |
| O  | -2.16996447365974 | 4.63283896737352  | -1.16873356552554 |
| C  | -4.32485132528631 | 3.37583369613359  | 1.69098028403749  |
| O  | -5.47486255971741 | 3.38673097000156  | 1.66602196459000  |
| C  | -2.27180690741703 | 5.16559883009764  | 2.57975599586387  |
| O  | -2.26419088906836 | 6.21320646722612  | 3.05936716586420  |
| C  | -2.36198819913320 | 2.45808745327674  | 3.56982080887157  |
| O  | -2.40268914352892 | 1.92100101777963  | 4.58913332517438  |
| Mo | -2.28891349981045 | 3.34368605099961  | 1.74583008703933  |

**W-1a** E = -1068.811086833151 au

ZPE = 0.09379277 au

G<sub>corr</sub> = 0.04967234 au

|   |                   |                   |                   |
|---|-------------------|-------------------|-------------------|
| C | -3.28959325417874 | -0.34262985087467 | 1.38567765388318  |
| H | -3.73267836426794 | -1.05726893795696 | 0.70544674410277  |
| H | -3.85904700285924 | -0.16440267261159 | 2.29056581228367  |
| N | -1.82243499188609 | -0.40537434870825 | 1.46812455309403  |
| H | -1.48763355165207 | -0.24606103133492 | 2.41265135954976  |
| P | -2.39099339173102 | 1.08783920017964  | 0.74212158762433  |
| H | -2.18766712567822 | 0.79615015281479  | -0.62224560381372 |
| C | -0.21848882608670 | 3.20373854914204  | 1.79206608311439  |
| O | 0.93023632039969  | 3.13480110325294  | 1.83256697996365  |
| C | -2.15400790573389 | 4.14732049438786  | -0.14182105941111 |
| O | -2.09396255440054 | 4.58605296889240  | -1.20474493810026 |
| C | -4.29996821388609 | 3.47436504873051  | 1.69055569714733  |
| O | -5.44920348927542 | 3.54586508753358  | 1.67233465041406  |
| C | -2.15538644747524 | 5.17426501683356  | 2.55842306977947  |
| O | -2.09700315383616 | 6.22498851324566  | 3.03094754611137  |
| C | -2.36537584435759 | 2.46562374610961  | 3.57174461099344  |
| O | -2.42580083608953 | 1.93332380177242  | 4.59423340679210  |
| W | -2.25977592700514 | 3.34142496859131  | 1.73586620647148  |

**B-1a** E = -462.546820698529 au

ZPE = 0.08161784 au

G<sub>corr</sub> = 0.05314072 au

|   |                   |                   |                  |
|---|-------------------|-------------------|------------------|
| C | -3.31085116106950 | -0.12181641246533 | 1.43013334415072 |
| H | -3.76058131051952 | -0.83648853286641 | 0.75457622486497 |
| H | -3.89416335333345 | 0.09713994877246  | 2.31701129782125 |
| N | -1.84246949649180 | -0.23398247559768 | 1.55173938785367 |

|   |                   |                   |                   |
|---|-------------------|-------------------|-------------------|
| H | -1.52207232366757 | -0.07385592980242 | 2.50113343494644  |
| P | -2.34018861434988 | 1.25067741305543  | 0.79777499208911  |
| H | -2.09021538227853 | 1.01218299274687  | -0.56770987435979 |
| H | -1.06662769216096 | 3.32125358501522  | 1.45146351463659  |
| H | -3.00601571373823 | 3.66009713657529  | 0.98867112481215  |
| H | -2.53402885543088 | 2.76410544230603  | 2.74682804170583  |
| B | -2.21519997695966 | 2.98211390226050  | 1.60062527147905  |

**O-1a** E = -511.125702038646 au  
ZPE = 0.05559847 au  
G<sub>corr</sub> = 0.02869880 au

|   |                   |                   |                   |
|---|-------------------|-------------------|-------------------|
| C | -3.34861571119977 | -0.12061890942280 | 1.40165066085165  |
| H | -3.79161951944101 | -0.84269823512843 | 0.72702520750569  |
| H | -3.92705508782647 | 0.06141595867086  | 2.30124919116911  |
| N | -1.84342909327130 | -0.24315513854677 | 1.55442164519709  |
| H | -1.52000638888586 | -0.27585338044290 | 2.51265691593393  |
| P | -2.31969680841867 | 1.24525705185987  | 0.90827614449965  |
| H | -1.97104855599248 | 1.18284435697989  | -0.45151981014527 |
| O | -2.25761577496440 | 2.59437816603026  | 1.53490907498814  |

**W-1a<sup>c</sup>** E = -1106.812495984085 au  
ZPE = 0.09746053 au  
G<sub>corr</sub> = 0.05210278 au

|   |                   |                   |                   |
|---|-------------------|-------------------|-------------------|
| N | -1.93986441279810 | -0.42622329947792 | 1.47950452826274  |
| H | -1.57330578863974 | -0.40094818462346 | 2.42591319832744  |
| P | -2.39038628983097 | 1.11503413624098  | 0.71851992907179  |
| H | -2.06099850297702 | 0.82257884293402  | -0.62256201476623 |
| C | -0.21681063436627 | 3.20795959316229  | 1.79647968379240  |
| O | 0.93153218000278  | 3.13451080164900  | 1.84287465999127  |
| C | -2.13245211853058 | 4.16834081542609  | -0.14330576850382 |
| O | -2.06106695591059 | 4.61577877356406  | -1.20199739521842 |
| C | -4.29912586595331 | 3.47425875312155  | 1.67034653912786  |
| O | -5.44805224479759 | 3.53705529928013  | 1.64504161975484  |
| C | -2.15787974723197 | 5.17892079325997  | 2.56054425079425  |
| O | -2.10108525785455 | 6.22655059506153  | 3.03890358685480  |
| C | -2.38064008004050 | 2.45892552534124  | 3.55851633583607  |
| O | -2.44672276930873 | 1.92430088209011  | 4.57768229218334  |
| W | -2.25665313203802 | 3.34840195694008  | 1.72579467327704  |
| C | -3.31718576458620 | -0.27444870442967 | 1.31559686778553  |
| C | -4.46635749091880 | -0.83961849395154 | 1.62870804517854  |
| H | -5.39726105663039 | -0.40585283252481 | 1.29873122416962  |
| H | -4.50617106758938 | -1.74945673306369 | 2.21320282408089  |

**W-1a<sup>NH</sup>** E = -1122.856521716639 au

ZPE = 0.08634748 au

G<sub>corr</sub> = 0.04086244 au

|   |                   |                   |                   |
|---|-------------------|-------------------|-------------------|
| N | -2.09736132166119 | -0.38448835164009 | 1.43953469741407  |
| H | -1.64190828043477 | -0.54516817828930 | 2.33047810428917  |
| P | -2.47717865082822 | 1.17371437353626  | 0.68474302398301  |
| H | -2.09987873069060 | 0.88987286828934  | -0.64737112338041 |
| C | -0.20684015100607 | 3.13114949715395  | 1.76451640608328  |
| O | 0.93611934012139  | 2.99597557410092  | 1.79608956779394  |
| C | -2.09099415009165 | 4.20912064582520  | -0.14404225464944 |
| O | -2.00667660320432 | 4.66174819887991  | -1.19938426692330 |
| C | -4.27009939680409 | 3.62780272774857  | 1.69356467218746  |
| O | -5.41291824980698 | 3.76439877550606  | 1.68604367728812  |
| C | -2.02420100343326 | 5.19639810328723  | 2.56785045834568  |
| O | -1.89703964286402 | 6.23422331138736  | 3.05287520820965  |
| C | -2.38585409365170 | 2.48776607016908  | 3.55095757815532  |
| O | -2.46445567319517 | 1.95723248292706  | 4.57053683349972  |
| W | -2.23766210442215 | 3.38007626034925  | 1.71941794026358  |
| C | -3.44101961215058 | -0.26807912526296 | 1.29848589558292  |
| N | -4.47809090486917 | -0.86739285053530 | 1.66443027849497  |
| H | -5.32641053100739 | -0.41746230343262 | 1.33477854336222  |

**W-1a<sup>0</sup>** E = -1142.729919808355 au

ZPE = 0.07394523 au

G<sub>corr</sub> = 0.02834780 au

|   |                   |                   |                   |
|---|-------------------|-------------------|-------------------|
| N | -1.88323581326459 | -0.34685057133778 | 1.50394934048660  |
| H | -1.21304520041655 | -0.65807316302486 | 2.19913439506319  |
| P | -2.48490376818128 | 1.14223002668277  | 0.74098480351867  |
| H | -2.10288961551865 | 0.89794016690440  | -0.60053702422136 |
| C | -0.28685865225271 | 3.14996493642224  | 1.81350951201130  |
| O | 0.85727033629241  | 3.02623896889715  | 1.86455695712639  |
| C | -2.16376493884368 | 4.15222612573420  | -0.14501970366334 |
| O | -2.07381361624471 | 4.57784804749314  | -1.21100665278895 |
| C | -4.35718811181435 | 3.59926665518211  | 1.68895535771727  |
| O | -5.49778039697842 | 3.74164881572145  | 1.67435002892242  |
| C | -2.13401322558989 | 5.20783379148204  | 2.54279423639522  |
| O | -2.01770806652868 | 6.25888260131342  | 3.00051728181390  |
| C | -2.47809587934798 | 2.51564767954410  | 3.58708887642540  |
| O | -2.56219247569203 | 2.01341109156655  | 4.62018557852522  |
| W | -2.31788039229148 | 3.36700237151422  | 1.73609261613533  |
| C | -3.19652288908955 | -0.48294181890772 | 1.40949605614221  |
| O | -4.12464504423775 | -1.16741698518750 | 1.71189949039045  |

**1a<sup>-P-C cleav</sup>** E = -912.460272112268 au

ZPE = 0.15462185 au

$G_{\text{corr}} = 0.11838858 \text{ au}$

|   |                   |                   |                   |
|---|-------------------|-------------------|-------------------|
| N | -2.88912845619132 | 1.10310848662045  | 1.52179654667689  |
| H | -3.23882741684223 | 1.15997359195865  | 2.46110080673201  |
| P | -1.93552263436760 | 2.41789762535408  | 1.01178083423700  |
| H | -2.64184278763220 | 2.81139577994615  | -0.17125132470251 |
| C | -0.53917852899390 | 1.60234255684099  | 0.10261455019456  |
| H | -0.86457931756001 | 0.83820501284270  | -0.60056446672180 |
| H | 0.00631520427227  | 2.36694880976971  | -0.45048543645388 |
| H | 0.14146392287462  | 1.14980881857049  | 0.81937292264361  |
| C | -3.48354329070196 | 0.07745219504612  | 0.69594095629418  |
| H | -3.25828346559811 | 0.28558936581875  | -0.34770191007528 |
| H | -4.57148184478131 | 0.05272618843228  | 0.78837386697991  |
| P | -2.81464268537733 | -1.59368550350267 | 1.23061393154223  |
| H | -1.48429560250460 | -1.32782255842954 | 0.77303551076304  |
| N | -3.39717457236903 | -2.63585675084759 | -0.00478718457774 |
| H | -3.54851610945824 | -3.57426870449242 | 0.32750733041277  |
| C | -2.87628217964879 | -2.59225981813841 | -1.35968487984119 |
| H | -1.80608121476543 | -2.82416822662791 | -1.42378898312801 |
| H | -3.41739771303435 | -3.29674465079246 | -1.99073837308350 |
| H | -3.02515436732029 | -1.60190684836937 | -1.78490723789231 |

**1a**-*C-N cleav*  $E = -570.940770260271 \text{ au}$

ZPE = 0.14594003 au

$G_{\text{corr}} = 0.11274459 \text{ au}$

|   |                   |                   |                   |
|---|-------------------|-------------------|-------------------|
| P | -1.63360206524379 | 1.04530233072075  | 0.37180088791029  |
| H | -1.82475700235719 | 1.98740805069230  | -0.68986095011260 |
| C | -2.92347829561968 | -0.16569053415901 | -0.23189497322728 |
| H | -2.90211667431032 | -0.26141021198940 | -1.31730019905808 |
| H | -2.67237619318806 | -1.15315698202796 | 0.18554085636234  |
| N | -0.18193822943837 | 0.26492445784670  | -0.11048863237231 |
| H | 0.59634438522240  | 0.53006428466367  | 0.47062545208178  |
| C | 0.18160618560947  | 0.11747025680156  | -1.50889875182175 |
| H | 0.26897325119333  | 1.07290451676174  | -2.04103317241158 |
| H | 1.13181080766496  | -0.40918704215557 | -1.59241880249796 |
| H | -0.56485368517829 | -0.48156796566013 | -2.02613293651770 |
| N | -4.22314714553414 | 0.34477869652162  | 0.15621075636071  |
| H | -4.26576314718791 | 0.42450598910173  | 1.16423357113067  |
| C | -5.32841997676302 | -0.46497749250897 | -0.32216182269612 |
| H | -6.26665870926368 | -0.06219145023409 | 0.05584017626150  |
| H | -5.36834390264592 | -0.42213557373245 | -1.41051096441354 |
| H | -5.26686862295975 | -1.52592369064249 | -0.03444795497836 |

**1b**-*P-C cleav*  $E = -990.919970276494 \text{ au}$

ZPE = 0.20979105 au

$G_{\text{corr}} = 0.17071948 \text{ au}$

|   |                   |                   |                   |
|---|-------------------|-------------------|-------------------|
| N | -2.98047560631924 | 1.60808749144047  | 1.21045891352609  |
| P | -1.73224843409659 | 2.66590560911192  | 0.69843823311502  |
| H | -2.09734629479431 | 2.89359006320290  | -0.67307254995641 |
| C | -0.35552767674228 | 1.49094447517150  | 0.30918488549178  |
| H | -0.65726903966060 | 0.65093885944744  | -0.31317119526372 |
| H | 0.42656296956988  | 2.04154655208297  | -0.21323840330198 |
| H | 0.05957109669876  | 1.10571680798338  | 1.23692036045488  |
| C | -3.49499450122040 | 0.54737855107020  | 0.36963232983910  |
| H | -2.98006485259138 | 0.54334794688316  | -0.58798555670432 |
| H | -4.56057187893696 | 0.68234933077734  | 0.16033679586119  |
| P | -3.29347146105789 | -1.08737494295999 | 1.27224575627636  |
| H | -1.87850307304647 | -1.16519974827534 | 1.05440540699154  |
| N | -3.88762248140377 | -2.21546229792823 | 0.11257356883780  |
| C | -3.17310583700953 | -2.40719133834167 | -1.13392892184843 |
| H | -2.26096298652927 | -3.00773907766057 | -1.00790196376380 |
| H | -3.81096944378785 | -2.91702643179126 | -1.85822177597384 |
| H | -2.88906627145800 | -1.45160526539808 | -1.56558366822752 |
| C | -4.42221870421891 | -3.45473949754938 | 0.65142465837234  |
| H | -3.64588180293516 | -4.20517850479662 | 0.85450071314927  |
| H | -4.95140042305970 | -3.25616017014813 | 1.57959672120386  |
| H | -5.12915832402728 | -3.89193030963398 | -0.05624382211137 |
| C | -3.92532437203727 | 2.10424327995482  | 2.19533144539610  |
| H | -4.79131468671224 | 2.59679745648987  | 1.73494274043073  |
| H | -4.29312491911052 | 1.27966597137183  | 2.80647327941333  |
| H | -3.43395018551297 | 2.81817094949544  | 2.85027846879198  |

**1b**-*C-N cleav*  $E = -649.403294225575 \text{ au}$

$ZPE = 0.20074227 \text{ au}$

$G_{\text{corr}} = 0.16464015 \text{ au}$

|   |                   |                   |                   |
|---|-------------------|-------------------|-------------------|
| P | -1.64848292769599 | 1.28969734111245  | 0.21229000322988  |
| H | -1.94214056415446 | 2.00736906794063  | -0.99519568447788 |
| C | -2.86460318115473 | -0.09691267790640 | -0.12295801485418 |
| H | -2.87850909541359 | -0.34705179077107 | -1.18105148999688 |
| H | -2.51986716159011 | -0.99089256392496 | 0.42019505456138  |
| N | -0.15003850221080 | 0.53149996616111  | -0.18040597416776 |
| C | 0.09036651500910  | 0.08283379535311  | -1.53769945600924 |
| H | 0.27905470695146  | 0.91559504781781  | -2.23058598299591 |
| H | 0.95890971636339  | -0.57754677881040 | -1.56479117997173 |
| H | -0.75930133810749 | -0.48052342438547 | -1.91252565157121 |
| N | -4.19322267800594 | 0.33991005923601  | 0.26532010063988  |
| C | -5.23767221579780 | -0.39534507922407 | -0.42025625109154 |
| H | -6.21045679257870 | 0.01249158975142  | -0.14975629042626 |
| H | -5.12058739616591 | -0.29301659117565 | -1.49756958599355 |

|   |                   |                   |                   |
|---|-------------------|-------------------|-------------------|
| H | -5.24226936393856 | -1.47093579511180 | -0.17600274628982 |
| C | -4.38145680545554 | 0.31075750392530  | 1.70297012196498  |
| H | -4.34543244774580 | -0.71240528287963 | 2.11381273472721  |
| H | -3.60719468959469 | 0.89746898331967  | 2.19062066989537  |
| H | -5.34603840063678 | 0.74526206790634  | 1.95844368634327  |
| C | 1.02585662846241  | 1.13104113042221  | 0.42773674976295  |
| H | 0.79797318097621  | 1.44192142263865  | 1.44392481767926  |
| H | 1.83434782742471  | 0.39877738461360  | 0.46912644910190  |
| H | 1.39730764505964  | 2.00690063399114  | -0.12233334006013 |

**1c**<sup>P-C cleav</sup> E = -951.705559791732 au  
ZPE = 0.18258627 au  
G<sub>corr</sub> = 0.14496368 au

|   |                   |                   |                   |
|---|-------------------|-------------------|-------------------|
| N | -2.46140760677971 | 0.95975603664391  | 1.67444860107930  |
| H | -2.77813130329289 | 0.97959335511615  | 2.63019567145795  |
| P | -1.76727509877011 | 2.43139858395458  | 1.14424190136075  |
| H | -2.68907909529980 | 2.81275382852674  | 0.11411804514635  |
| C | -0.44860005621174 | 1.83674784899591  | -0.01398779413412 |
| H | -0.79461744333417 | 1.08024937840246  | -0.71570597011651 |
| H | -0.07304524319969 | 2.68733729941537  | -0.58226312015411 |
| H | 0.37291060951003  | 1.42408611094099  | 0.56604923462297  |
| C | -3.20477902692299 | 0.03363813872424  | 0.83652806946296  |
| H | -2.93568597035917 | 0.24102867255174  | -0.19791620007014 |
| P | -2.56921477752190 | -1.67139958599507 | 1.31822734541502  |
| H | -1.27189720770930 | -1.45338280213062 | 0.75404013614407  |
| N | -3.28378381147257 | -2.69824212837157 | 0.14046688689474  |
| H | -3.42442343446862 | -3.63517019627743 | 0.48100052240432  |
| C | -2.89909403902669 | -2.64927974466049 | -1.25814070950425 |
| H | -1.83795937118659 | -2.86980402981617 | -1.42751114478057 |
| H | -3.49215781035140 | -3.35848582166933 | -1.83478988250206 |
| H | -3.09847595898144 | -1.65933134605264 | -1.66448270974653 |
| C | -4.70717556145664 | 0.13589137979988  | 0.99428642676879  |
| H | -5.00160041928984 | -0.05967856779434 | 2.02603503394855  |
| H | -5.05336944106081 | 1.13349523206156  | 0.72368971234839  |
| H | -5.21350577281376 | -0.59356362236585 | 0.36422877395411  |

**1c**<sup>C-N cleav</sup> E = -610.183813541824 au  
ZPE = 0.17372862 au  
G<sub>corr</sub> = 0.13909768 au

|   |                   |                   |                   |
|---|-------------------|-------------------|-------------------|
| P | -1.67224829680299 | 0.98062025981392  | 0.39322590303069  |
| H | -1.97178768252021 | 1.87012538135408  | -0.68577832673233 |
| C | -2.92596140321533 | -0.31808871570277 | -0.13564346609652 |
| H | -2.89220453911523 | -0.42745644045329 | -1.22087186788330 |
| N | -0.18114257854391 | 0.30196806086951  | -0.12716969269838 |



|   |                   |                   |                   |
|---|-------------------|-------------------|-------------------|
| H | 0.59647399958233  | 0.61657519853765  | 0.42929251041981  |
| C | 0.14454087911766  | 0.15706853835060  | -1.53386201667923 |
| H | 0.15406977339620  | 1.10776364228661  | -2.08122980192211 |
| H | 1.12164439844597  | -0.31235273147260 | -1.64573358487404 |
| H | -0.58246958513120 | -0.49302198528830 | -2.01750883977815 |
| N | -4.20700279103419 | 0.29405780796003  | 0.18687708735646  |
| H | -4.32511345519212 | 0.31788730733806  | 1.19191412495590  |
| C | -5.36370937702697 | -0.31573496462326 | -0.44388146026407 |
| H | -6.26312996140168 | 0.21138650064925  | -0.12969133729809 |
| H | -5.28460948988213 | -0.20652448554853 | -1.52531642885101 |
| H | -5.50532672369464 | -1.38341297336943 | -0.22654692415562 |
| C | -2.63823629209498 | -1.65986998981470 | 0.51645637487396  |
| H | -2.66466862924226 | -1.57159520448387 | 1.60366742234152  |
| H | -3.36792730985998 | -2.41261531367048 | 0.21887479666583  |
| H | -1.64786076578427 | -2.02001822273248 | 0.24313608758870  |

**1d**-P-C cleav E = -990.959141157149 au  
ZPE = 0.21142845au  
G<sub>corr</sub> = 0.17157787 au

|   |                   |                   |                   |
|---|-------------------|-------------------|-------------------|
| N | -1.71289686116435 | 0.73223455250796  | -0.33888598281495 |
| H | -0.77126798191711 | 0.46338884099569  | -0.07873446233961 |
| P | -2.15385870207486 | 2.36345376991504  | -0.00317293953670 |
| C | -1.56042194267779 | 2.64126493872904  | 1.74013557391192  |
| H | -0.51423522185880 | 2.36060549569894  | 1.87227488223371  |
| H | -1.67391787333905 | 3.69054687754673  | 2.01145633206047  |
| H | -2.16849919471602 | 2.05644986436511  | 2.42744572455705  |
| C | -2.67221231149890 | -0.32351650844770 | -0.06501180172710 |
| H | -3.66666490478832 | 0.03786919255387  | -0.33370873030479 |
| H | -2.71166763448483 | -0.62763959994424 | 0.98913304804503  |
| P | -2.23898630448973 | -1.83937709138091 | -1.08814559633779 |
| N | -3.46241113369491 | -2.97514191792425 | -0.67902822291516 |
| H | -4.40996075067156 | -2.61987400407899 | -0.66620351633588 |
| C | -3.20820562929554 | -3.92505707622739 | 0.39079239289674  |
| H | -3.26997440696675 | -3.50167475821432 | 1.40052696278696  |
| H | -3.91659987149447 | -4.75148740359481 | 0.32933493393482  |
| H | -2.20927082865381 | -4.33838188047845 | 0.26744331336466  |
| C | -0.77683051907464 | 3.21391496015920  | -0.89348997150931 |
| H | 0.20308231420641  | 2.82768881459985  | -0.60890333882490 |
| H | -0.90486353436698 | 3.08583547100487  | -1.96500307947903 |
| H | -0.80292714759456 | 4.27906484135096  | -0.67042812593882 |
| C | -2.89168379172271 | -1.24205579515787 | -2.70499030876933 |
| H | -3.96406757368088 | -1.04569941018424 | -2.66522622855852 |
| H | -2.38143651921351 | -0.31605156697335 | -2.95944147931025 |
| H | -2.69772195476609 | -1.97719617682075 | -3.48107260908921 |

**1d**-C-N cleav E = -610.190688790488 au  
ZPE = 0.17457964 au  
G<sub>corr</sub> = 0.13966566 au

|   |                   |                   |                   |
|---|-------------------|-------------------|-------------------|
| P | -1.57610211423776 | 0.99048458806967  | 0.48738734941007  |
| C | -2.90813722319291 | -0.10158290228509 | -0.23416084569185 |
| H | -2.91749520172315 | -0.04042018474773 | -1.32466445612887 |
| H | -2.66022878561377 | -1.14087167541047 | 0.03009524986403  |
| N | -0.17090993816602 | 0.19263024839112  | -0.09799565729818 |
| H | 0.61623297932756  | 0.31693567237139  | 0.51679018244237  |
| C | 0.20816839451464  | 0.13207635778454  | -1.49812249275183 |
| H | 0.51330577025742  | 1.09460047010779  | -1.92368804904252 |
| H | 1.03336391963947  | -0.56838251579367 | -1.62423229754567 |
| H | -0.62208222576682 | -0.24375283662448 | -2.09225982965341 |
| N | -4.19681334524346 | 0.35156981912934  | 0.25653226869034  |
| H | -4.19753432057658 | 0.31080721214856  | 1.26814284397068  |
| C | -5.31233661025921 | -0.41622933497435 | -0.26571602871659 |
| H | -6.23915808796671 | -0.07174588388993 | 0.19043146894632  |
| H | -5.39549190477931 | -0.25454655157290 | -1.34045414622086 |
| H | -5.22819058076721 | -1.50148781391592 | -0.10038269446295 |
| C | -1.82520432308865 | 2.46346860503441  | -0.61064959735282 |
| H | -2.83806161005482 | 2.82367848079736  | -0.44282420080736 |
| H | -1.12815744337850 | 3.25632820203947  | -0.34812258434894 |
| H | -1.71823086892421 | 2.23322306334087  | -1.67017907330193 |

**1e**-P-N cleav E = -834.632419795535 au  
ZPE = 0.11867507 au  
G<sub>corr</sub> = 0.08574383 au

|   |                   |                   |                   |
|---|-------------------|-------------------|-------------------|
| N | -3.06294947897864 | 1.67439233734289  | -0.24563991354928 |
| H | -3.80574298307813 | 1.32866215696339  | -0.83519957751645 |
| H | -2.85117635027644 | 2.65473106752625  | -0.36128219112393 |
| P | -2.30178215800124 | 0.74174334036015  | 0.83725056011492  |
| C | -0.77089402927899 | -0.14448046421687 | 0.24490563370782  |
| H | -0.10589341126074 | 0.58379410044181  | -0.21938829711267 |
| H | -1.08722153096583 | -0.83359342825990 | -0.53639996596631 |
| N | -0.14598163619607 | -0.84983956848342 | 1.36315294527581  |
| H | 0.38647176684988  | -0.25765231826084 | 1.98917727762446  |
| P | 0.42564439274702  | -2.40980206794875 | 1.26254215861835  |
| H | -1.90222948356660 | 1.52533555931916  | 1.92706647242173  |
| H | -3.17176454104810 | -0.24551494300501 | 1.31541469922600  |
| H | 1.50098964996980  | -2.62720372277715 | 0.38082120212578  |
| H | -0.61797720850527 | -3.24239787618002 | 0.84437676192420  |
| H | 0.83116061158937  | -2.77875016282169 | 2.54868089422955  |

**1e**-C-N cleav E = -532.153387664690 au

ZPE = 0.12899485 au

G<sub>corr</sub> = 0.09744468 au

|   |                   |                   |                   |
|---|-------------------|-------------------|-------------------|
| C | -2.82374674323272 | 1.59507004822995  | -0.51163281667189 |
| H | -3.21400595669789 | 0.75952656903416  | -1.08595220429833 |
| H | -2.30571787584776 | 2.27883468194024  | -1.18092997504279 |
| H | -3.66591478524399 | 2.10530328768719  | -0.05628245696091 |
| N | -1.95231558699044 | 1.09066170793487  | 0.56369590270298  |
| H | -1.72163530764957 | 1.77268251174121  | 1.27151866224506  |
| P | -0.88501762892075 | -0.14330854224915 | 0.35354690784300  |
| H | 0.33995364303407  | 0.15688015876731  | -0.27828507526971 |
| C | -0.39372221832794 | -1.12759024120077 | 1.83402226142018  |
| H | 0.11100085800848  | -0.48763394953347 | 2.55442088784282  |
| H | -1.29106448176788 | -1.52234591510273 | 2.30493536157559  |
| N | 0.45077439200951  | -2.11514169628008 | 1.22634586041815  |
| H | 1.41021191669683  | -2.09171555183819 | 1.52881997834009  |
| H | 0.08927040873590  | -3.05343300336785 | 1.26923729836619  |
| H | -1.51280198380583 | -1.02224755576268 | -0.53108409251044 |

**1e**-C-P cleav E = -818.585394336126 au

ZPE = 0.12957379 au

G<sub>corr</sub> = 0.09674024 au

|   |                   |                   |                   |
|---|-------------------|-------------------|-------------------|
| P | -2.78776342003712 | 1.62621016141882  | -0.63973894615345 |
| C | -1.78655207675599 | 1.20364838142157  | 0.87356151758482  |
| H | -1.27664808216839 | 2.11487565142388  | 1.18703360042688  |
| H | -2.50697938229160 | 0.95917506302892  | 1.65263859358107  |
| N | -0.87544124923009 | 0.10383004303911  | 0.61285233271104  |
| H | -0.01588815246191 | 0.37545498539309  | 0.15250682169495  |
| P | -0.71329720847711 | -1.21616705965605 | 1.63759367664369  |
| C | 0.44537107181324  | -2.39474266856471 | 0.95930231396763  |
| H | 1.44339202682935  | -1.96398715698257 | 0.91190400174738  |
| H | 0.47713365485388  | -3.25570800707762 | 1.62761966568256  |
| H | 0.12327517371913  | -2.72056213900786 | -0.02612128993419 |
| H | -1.94655927557177 | 1.96868063971276  | -1.70469964038345 |
| H | -3.63158502845127 | 2.71547194014525  | -0.38204490276318 |
| H | -3.56886956067744 | 0.53770714618076  | -1.04370733937601 |
| H | -0.33011351855898 | -0.84528166097655 | 2.93878010409378  |
| H | -1.99817769253393 | -1.75417469949881 | 1.77317211047648  |

**1a**-H<sup>+</sup>-C-N cleav E = -532.360325915007 au

ZPE = 0.14771401 au

G<sub>corr</sub> = 0.11569210 au

|   |                   |                  |                   |
|---|-------------------|------------------|-------------------|
| C | -2.74410491698946 | 1.72962858719282 | -0.52547677436749 |
| H | -2.92826124669529 | 1.18022677998519 | -1.44176753139899 |
| H | -1.99398776834710 | 2.49609529034396 | -0.68069874213171 |

|   |                   |                   |                   |
|---|-------------------|-------------------|-------------------|
| H | -3.66485043348426 | 2.17806260388502  | -0.16740900288296 |
| N | -2.24925215950984 | 0.76228089370335  | 0.53620158064750  |
| H | -2.09898512250320 | 1.27964219537842  | 1.40342711935892  |
| P | -0.72841153819286 | -0.14911446239472 | -0.05629199264046 |
| H | 0.05840974917124  | 1.02273663544095  | -0.01064206035358 |
| C | -0.10485281160318 | -0.87509806608220 | 1.58912353682566  |
| H | 0.72098997139318  | -0.30424475038020 | 2.00163537803135  |
| H | -0.89452781978924 | -0.91969150999196 | 2.33538245843217  |
| N | 0.39122071127919  | -2.29244673327202 | 1.39662380264880  |
| H | 1.20041407338464  | -2.34302250352032 | 0.77297741392023  |
| H | 0.68927821561052  | -2.69263950466525 | 2.29134102934025  |
| H | -2.99656877634185 | 0.09209515630716  | 0.72188994152981  |
| H | -0.32145609738245 | -2.91723102193018 | 1.01228641304047  |

**1a·H<sup>+</sup>-C-P cleav** E = -818.382817641193 au

ZPE = 0.12288835 au

G<sub>corr</sub> = 0.09002012 au

|   |                   |                   |                   |
|---|-------------------|-------------------|-------------------|
| P | -2.20485721283268 | 2.09290078374285  | -0.85257253253868 |
| C | -1.66175907144247 | 1.27635234745420  | 0.75707728573526  |
| H | -1.05406942868509 | 1.90410755460076  | 1.39945115005669  |
| H | -2.53836461983133 | 0.95711475309691  | 1.31241434204101  |
| N | -0.86452017039643 | 0.03467387205403  | 0.45312889272491  |
| H | -0.00531518901570 | 0.28737886088643  | -0.03373208585010 |
| P | -0.50905318803078 | -1.02007139893035 | 1.97658523014310  |
| C | 0.73224618627405  | -2.14995852618748 | 1.23009199545962  |
| H | 1.52306670488200  | -1.65770183196442 | 0.66985493908142  |
| H | 1.19906878231335  | -2.68324602995693 | 2.05848899846854  |
| H | 0.24403658643280  | -2.89874283253207 | 0.61220693426851  |
| H | -1.20943423895425 | 3.10052499826404  | -0.87179432524581 |
| H | -3.18267247639903 | 2.90766714077992  | -0.23744166729614 |
| H | 0.39243896647221  | -0.04650470968214 | 2.47756670473823  |
| H | -1.39736632078663 | -0.53069832162576 | -0.20891613178657 |

**1a·H<sup>+</sup>-N-P cleav** E = -834.629473233048 au

ZPE = 0.12662979 au

G<sub>corr</sub> = 0.09354091 au

|   |                   |                   |                   |
|---|-------------------|-------------------|-------------------|
| N | -2.58867952412983 | 2.06059115487485  | -0.25999153569634 |
| H | -3.35744588266310 | 1.46591320019756  | -0.57550504132038 |
| H | -3.01386775468493 | 2.96497298539822  | -0.03571435369961 |
| P | -1.78531462719113 | 1.38476558787144  | 1.30452787649003  |
| C | -0.73306418462174 | 0.02858269934271  | 0.48336762806888  |
| H | 0.10767821303755  | 0.41135957269543  | -0.08729974124039 |
| H | -1.36670782993770 | -0.55878693107555 | -0.17755675452055 |
| N | -0.18744125364987 | -0.90867536172051 | 1.51791565955298  |

|   |                   |                   |                   |
|---|-------------------|-------------------|-------------------|
| H | 0.43557463026315  | -0.41221564374337 | 2.15583011194159  |
| P | 0.87764870332548  | -2.30797670446781 | 0.72147121363967  |
| H | -0.79447258741333 | 2.39634817085259  | 1.29195857279634  |
| H | -0.28167020486709 | -3.07907618613503 | 0.45085083108581  |
| H | 1.08645309545078  | -2.90945994842146 | 1.98860784959081  |
| H | -1.96863314479571 | 2.21995171735699  | -1.05659596023131 |
| H | -0.93433078812251 | -1.30091108302605 | 2.09274485354246  |

**1f-P-C cleav** E = -914.743510339303 au

ZPE = 0.18959690 au

G<sub>corr</sub> = 0.15244090 au

|   |                   |                   |                   |
|---|-------------------|-------------------|-------------------|
| N | -1.83035577618694 | 0.77120716501070  | 0.38077559935418  |
| H | -1.22892566034341 | 0.47819166428294  | 1.14623109450904  |
| C | -0.71655157640319 | 3.10378556739707  | 0.94557265236696  |
| H | -0.47898800760394 | 3.84028203400208  | 0.18161537928063  |
| H | -0.74015854374440 | 3.62347975187794  | 1.90097250192324  |
| H | 0.03986483920629  | 2.32801098275784  | 0.94619075303446  |
| C | -2.88489228687307 | -0.18070665882698 | 0.21781938163948  |
| H | -3.36291124700921 | -0.06595717632580 | -0.75227203543339 |
| H | -3.68745879188152 | -0.11114766692210 | 0.98429310156842  |
| N | -3.61321110225730 | -2.50410372574124 | -0.78349324198572 |
| H | -4.50285931173777 | -2.10052645613356 | -0.50935779672113 |
| C | -3.73501690515142 | -3.94444461533419 | -0.85374281779084 |
| H | -3.87615882730614 | -4.44125588845236 | 0.12253147472933  |
| H | -4.56722009310266 | -4.23171583161854 | -1.49530089371181 |
| H | -2.83116057155068 | -4.36797642348501 | -1.29568177728034 |
| P | -2.42028071208250 | 2.48583714720565  | 0.59466505262806  |
| H | -2.91659300582299 | 3.87059232535463  | 0.72363072812605  |
| H | -2.97683646900699 | 2.41559039485707  | -0.70425486362590 |
| H | -3.35272472680655 | 2.10451854844181  | 1.61479078880586  |
| P | -2.27141880493367 | -1.95408838302552 | 0.30848771283278  |
| H | -1.15951751893820 | -1.49840698327946 | 1.18174879104308  |
| H | -2.61732569105417 | -2.89862878166049 | 1.33205620667116  |
| H | -1.33062116940937 | -2.51795497038247 | -0.58233994196356 |

**1f-C-N cleav** E = -572.085277513093 au

ZPE = 0.16401948 au

G<sub>corr</sub> = 0.13047498 au

|   |                   |                   |                   |
|---|-------------------|-------------------|-------------------|
| C | -2.79527076075088 | -0.01599083231414 | -0.37083533116050 |
| H | -2.77844291593905 | 0.17686822375213  | -1.44454973966664 |
| H | -2.49573516267984 | -1.06532831173400 | -0.21856656301870 |
| N | -0.21057292272636 | 0.58037482227972  | -0.30289329394819 |
| H | 0.62991045535834  | 1.07915016794771  | -0.06029703283954 |
| C | -0.09862432554026 | -0.30153096362834 | -1.45139247938962 |

|   |                   |                   |                   |
|---|-------------------|-------------------|-------------------|
| H | -0.53181993336019 | 0.11931539102152  | -2.36192454553770 |
| H | 0.95608956899648  | -0.48622547883106 | -1.64441070216684 |
| H | -0.56496668834339 | -1.26741149621888 | -1.27040882096470 |
| N | -4.11272262312952 | 0.28795923804813  | 0.12969400640287  |
| H | -4.13765865179236 | 0.14671683307771  | 1.13247061261168  |
| C | -5.17763918843029 | -0.47335990261300 | -0.49507448134171 |
| H | -6.12905103304549 | -0.22663537073193 | -0.02508568916383 |
| H | -5.25196502974729 | -0.20218031222595 | -1.54805404004622 |
| H | -5.04085416454029 | -1.56504582420549 | -0.44515620660483 |
| P | -1.58578120583478 | 1.17869047992017  | 0.52221373354469  |
| H | -0.62247278375081 | 2.03349439644978  | 1.22759082297896  |
| H | -2.40531432314728 | 2.29559810013268  | 0.17810955920222  |
| H | -2.14671312159669 | 0.77690940987323  | 1.78833714110861  |

**1g<sup>-P-C cleav</sup>** E = -1580.044769112147 au

ZPE = 0.28765626 au

G<sub>corr</sub> = 0.24162512 au

|   |                   |                   |                   |
|---|-------------------|-------------------|-------------------|
| C | -1.75270511733331 | -0.02827890073645 | -0.53163751144363 |
| N | -0.38255548713872 | 0.02024470850172  | -0.93631461521955 |
| P | 0.93393204686601  | -0.39897479297498 | 0.01849372272501  |
| H | -2.26100988301784 | 0.93279001356729  | -0.66236244011621 |
| H | -0.20073571716530 | 0.13947509373230  | -1.91849822541664 |
| O | 1.93914464686263  | 0.63193629959619  | 0.90854824192836  |
| O | 1.94814294252460  | -0.03866601337963 | -1.44443226040636 |
| C | 3.02027825643623  | 1.11486626289021  | 0.21068884688522  |
| C | 3.00603302478527  | 0.73005563566962  | -1.12835116143374 |
| C | 4.01417060614875  | 1.14228000201048  | -1.98041375502459 |
| C | 5.03271331298742  | 1.94089617850991  | -1.46053833496279 |
| C | 5.03799388769064  | 2.31811936094067  | -0.12519388299944 |
| C | 4.01844112794382  | 1.90305522760538  | 0.73376174166516  |
| H | 4.00465289586687  | 0.84470487776320  | -3.01949763520760 |
| H | 5.83015812225309  | 2.26889881184779  | -2.11360654484879 |
| H | 5.83682971532809  | 2.93683293714886  | 0.25934472290675  |
| H | 4.00374832525824  | 2.18804692237636  | 1.77627312125837  |
| P | -2.79499716517153 | -1.27917252970064 | -1.41426396981761 |
| H | 0.11296047231317  | -0.44434174708562 | 1.18368043159272  |
| C | 1.50142199795039  | -2.12941863642919 | 0.04765287592888  |
| H | 0.84545836537682  | -2.73012747177907 | 0.67020701541164  |
| H | 1.53168427794898  | -2.53656670466418 | -0.95612223250197 |
| H | 2.50783897459903  | -2.14956080164810 | 0.46189317545534  |
| H | -1.81027455571738 | -0.27597588734051 | 0.52601715368368  |
| H | -3.93093161638902 | -1.19496224247151 | -0.55018745024733 |
| O | -2.56431456950414 | -2.82798893017220 | -0.70612955202449 |
| O | -1.67954160630350 | -1.78265752176040 | -2.70362473285056 |
| C | -1.03132334697554 | -2.93287816893004 | -2.40995006934015 |

|   |                   |                   |                   |
|---|-------------------|-------------------|-------------------|
| C | -1.54148803252680 | -3.54484025209658 | -1.26725908171361 |
| C | 0.00221036974104  | -3.51106809871420 | -3.11836974083824 |
| C | -1.04734728158783 | -4.74384193509430 | -0.80626742345267 |
| C | 0.51717135212425  | -4.72131728229445 | -2.65272493407139 |
| H | 0.39800328094719  | -3.02939342061742 | -4.00078999780230 |
| C | 0.00215291716377  | -5.32914264396067 | -1.51629156475771 |
| H | -1.46003378824421 | -5.20550907631412 | 0.07935118585576  |
| H | 1.33207028837987  | -5.18805771939180 | -3.18855593420435 |
| H | 0.41569981362174  | -6.26663669737895 | -1.17195051729929 |
| H | -3.44573503404289 | -0.58915530722481 | -2.47200637729575 |

**1g**<sup>-P-N cleav</sup> E = -1596.108285529583 au

ZPE = 0.27712551 au

G<sub>corr</sub> = 0.23177380 au

|   |                   |                   |                   |
|---|-------------------|-------------------|-------------------|
| C | 1.62576370499299  | 0.01700622201563  | -0.84872618497859 |
| N | 1.82658667457371  | 0.96159547036021  | 0.22250823587589  |
| P | 0.19200520319976  | 0.52927649504485  | -1.95869183184036 |
| H | 1.43792989628614  | -0.97070894702571 | -0.43278389056827 |
| H | 2.53770413885204  | -0.04723821687312 | -1.44631127025618 |
| H | 0.63495250777695  | 1.86802258719822  | -2.06777325480698 |
| O | -0.84396274955610 | 0.26768165450982  | -0.66426971540534 |
| O | -1.24987175139422 | 0.99569048545542  | -2.95304798261669 |
| C | -2.15150571230946 | 0.64377938732039  | -0.88452264238694 |
| C | -2.36330982611959 | 1.05490154240729  | -2.19689922766652 |
| C | -3.62290619667053 | 1.46383918994884  | -2.59571298887455 |
| C | -4.64876822218441 | 1.45082383220487  | -1.65054281041832 |
| C | -4.42071929644393 | 1.04043778975555  | -0.34445418523721 |
| C | -3.14925177197643 | 0.62867944334808  | 0.05882360489717  |
| H | -3.79559478891698 | 1.78695170581339  | -3.61248852454254 |
| H | -5.63896703749212 | 1.77060355388238  | -1.94580483770099 |
| H | -5.22949027892382 | 1.04467633909287  | 0.37280796080321  |
| H | -2.94086852175003 | 0.31397410733219  | 1.07037932350751  |
| P | 1.14097715492739  | 0.84718149147811  | 1.74898461509267  |
| N | 0.61056648297936  | -0.49527168094290 | -3.20250390139161 |
| H | -0.04344323889159 | -0.64784777628221 | -3.94873360046331 |
| H | 1.29734447527476  | -1.21472411506663 | -3.06687792364692 |
| H | 0.83864072849410  | -0.52920331007625 | 1.57095649135264  |
| H | 2.06612273335461  | 1.89932926086936  | -0.05747975841109 |
| H | 2.08713713693009  | 0.67423731778704  | 2.77646847168170  |
| O | -0.41533551864547 | 1.02319377043453  | 2.37585261412909  |
| O | 1.34964286786178  | 2.64180617643225  | 1.87866393125097  |
| C | 0.26735830142038  | 3.22098290425589  | 2.43362425097151  |
| C | -0.74593155484373 | 2.31186178351202  | 2.72758666989072  |
| C | 0.09310825908820  | 4.56550249652421  | 2.70427605276744  |
| C | -1.93961917767865 | 2.70156885449869  | 3.28648031679258  |

|   |                   |                  |                  |
|---|-------------------|------------------|------------------|
| C | -1.11190181762271 | 4.97253990905800 | 3.27688331405484 |
| H | 0.87794437684018  | 5.27310682734304 | 2.47738157468104 |
| C | -2.11504735298185 | 4.05841759429989 | 3.56449092985709 |
| H | -2.71097613823925 | 1.97548790214489 | 3.50048238069626 |
| H | -1.26204495196321 | 6.02054942374231 | 3.49830784634137 |
| H | -3.04311922824827 | 4.39390467819645 | 4.00576839656874 |

**1g**<sup>-C-N cleav</sup> E = -912.806246243515 au

ZPE = 0.20722106 au

G<sub>corr</sub> = 0.16862202 au

|   |                   |                   |                   |
|---|-------------------|-------------------|-------------------|
| C | 0.14120925384888  | -0.94021747045770 | 0.35628237436665  |
| N | 0.13946117694648  | -0.17602352561837 | -2.13506559392561 |
| P | 1.26201747718595  | -0.12158045443612 | -0.90273960715912 |
| H | -0.16139200728053 | -1.89381135443940 | -0.07979371538145 |
| H | 2.21751538896711  | -1.15600392537400 | -0.82845208649671 |
| O | 1.42649306133449  | 1.19268587576639  | 0.16460097688849  |
| O | 2.44668892784982  | 0.71315127190876  | -1.99499905333525 |
| C | 2.20755953932595  | 2.22185369922369  | -0.30257453830467 |
| C | 2.77227282326348  | 1.93476443443154  | -1.54385995769235 |
| C | 3.58180278017269  | 2.86730065945239  | -2.16755110224018 |
| C | 3.81304048578782  | 4.08104073047482  | -1.51983415096549 |
| C | 3.24425460498663  | 4.35587601151161  | -0.28456483838885 |
| C | 2.42371951622243  | 3.41591076570490  | 0.34332552735529  |
| H | 4.02521799767496  | 2.64702595426128  | -3.12837978053484 |
| H | 4.44778265002336  | 4.81796367090424  | -1.99332127891476 |
| H | 3.43473844289133  | 5.30286719706993  | 0.20099266292449  |
| H | 1.97153533502141  | 3.61225224986191  | 1.30541963992958  |
| H | -0.78586664380848 | -0.43448000500908 | -1.83887677768201 |
| C | 0.20628283177373  | 0.39914951763408  | -3.47155883015861 |
| H | 0.15221757102358  | 1.48755835608261  | -3.46377022414443 |
| H | 1.12350325314255  | 0.10864725601223  | -3.96976688929975 |
| H | -0.63363661437903 | 0.01486454766950  | -4.04743652908919 |
| N | 0.92231248291213  | -1.21189127075505 | 1.55104775233603  |
| H | 1.10181203865465  | -0.35028483856905 | 2.04695859633977  |
| H | 0.42262934062455  | -1.82739851352685 | 2.17800493305066  |
| H | -0.76340871416606 | -0.33676991978435 | 0.51595621052236  |

**1a**<sup>=C\_P-C cleav</sup> E = -950.477322694369 au

ZPE = 0.15869830 au

G<sub>corr</sub> = 0.12156388 au

|   |                   |                  |                  |
|---|-------------------|------------------|------------------|
| N | -2.23287758000062 | 0.84274669528253 | 0.85853669973724 |
| H | -1.74563785845330 | 0.43915667635671 | 1.64507619904561 |
| C | -0.55339151072743 | 2.96882154289269 | 1.17746517783995 |
| H | 0.10509449183063  | 2.73013397448951 | 0.34660483726731 |



|   |                   |                   |                   |
|---|-------------------|-------------------|-------------------|
| H | -0.48323433384206 | 4.03835451845112  | 1.37154052151157  |
| H | -0.20968437421827 | 2.43787192737868  | 2.06402339614236  |
| N | -3.62697198349540 | -2.70052310524740 | -0.10041614149251 |
| H | -4.36761913624259 | -2.54918686410298 | 0.56794204206440  |
| C | -3.50978416243161 | -4.07185917697880 | -0.55905725083404 |
| H | -3.20572396456823 | -4.77995199966074 | 0.21988431273026  |
| H | -4.46251164614818 | -4.40722363718528 | -0.96891279086583 |
| H | -2.77130238836242 | -4.11962701260496 | -1.35681726837936 |
| P | -2.29891015915936 | 2.56264102960070  | 0.71361864840344  |
| P | -2.23584014538937 | -1.73235572217030 | 0.04404301455892  |
| H | -1.93385419583642 | -1.74226174055690 | 1.45899787725449  |
| H | -2.86127687983425 | 2.90203226846619  | 1.98503170409864  |
| C | -2.99143953337630 | -0.04915589961876 | 0.10888881940624  |
| C | -4.06281980708235 | 0.26213209625475  | -0.62604600127891 |
| H | -4.51629728044713 | -0.48380148321627 | -1.25917314450439 |
| H | -4.48080584221531 | 1.25909323216953  | -0.63681782270539 |

**1a**<sup>=C-C-N cleav</sup> E = -608.957355163218 au

ZPE = 0.15040540 au

G<sub>corr</sub> = 0.11637243 au

|   |                   |                   |                   |
|---|-------------------|-------------------|-------------------|
| N | -0.58332277288394 | 0.31842820495220  | -0.62842339651448 |
| N | -4.30782720345532 | 0.10404478660248  | 0.75574689903397  |
| P | -1.63305526244233 | 0.72833762300695  | 0.65020755521045  |
| H | -2.26957149524811 | 1.93467830647290  | 0.19870727489026  |
| C | -4.37030466330545 | 0.70439181068386  | 2.07792620516833  |
| H | -3.76397938257579 | 1.60699249272043  | 2.11581785807713  |
| H | -5.39661126744688 | 1.00184748809487  | 2.27978207426657  |
| H | -4.03304597342785 | 0.03914344413871  | 2.88078812832856  |
| H | -5.03758801668710 | -0.58081656522472 | 0.61863449778039  |
| C | 0.83661808695585  | 0.58841207138945  | -0.49205207771749 |
| H | 1.11376993720832  | 1.63491756100173  | -0.66268853033699 |
| H | 1.15648010247876  | 0.32020051012301  | 0.51252834735014  |
| H | 1.39740107483758  | -0.02930200063006 | -1.19362917917943 |
| H | -0.93471915107238 | 0.45293922323851  | -1.56476564644366 |
| C | -3.08823137494342 | -0.34711999899223 | 0.25829276524994  |
| C | -2.95252465897412 | -1.46400796380833 | -0.46677292719175 |
| H | -2.00267527937440 | -1.73341592410525 | -0.89780277109078 |
| H | -3.79341781964340 | -2.12264095966449 | -0.65102328688117 |

**1a**<sup>=NH-P-C cleav</sup> E = -966.529185711248 au

ZPE = 0.14826006 au

G<sub>corr</sub> = 0.11137951 au

|   |                   |                  |                  |
|---|-------------------|------------------|------------------|
| N | -1.93900532632782 | 0.80207782888408 | 0.51628783754163 |
| H | -1.10047738437750 | 0.44808968487449 | 0.94956653083393 |

|   |                   |                   |                   |
|---|-------------------|-------------------|-------------------|
| C | -0.62440039041669 | 3.07542378811750  | 1.09837257625634  |
| H | 0.01407676542278  | 3.04318224100372  | 0.21885705964834  |
| H | -0.68545781085324 | 4.11171164397861  | 1.42561236120574  |
| H | -0.16017242563516 | 2.49785413813537  | 1.89719990591271  |
| N | -3.63912697000041 | -2.71789475720906 | 0.10001825694620  |
| H | -3.99894469741359 | -2.67265724552507 | 1.04184711414536  |
| C | -3.83159279355888 | -4.01299677446191 | -0.53243916684519 |
| H | -3.28336411670790 | -4.82900450106334 | -0.05103988422296 |
| H | -4.89130069252476 | -4.26662367744773 | -0.53244664962869 |
| H | -3.5040521651194  | -3.95617579058760 | -1.56794786173850 |
| P | -2.33213858324389 | 2.50512492427383  | 0.65089360493305  |
| P | -2.22915467279248 | -1.81857522586193 | -0.23831167379402 |
| H | -1.45367595471119 | -1.92000225899945 | 0.96844647473218  |
| H | -2.84240237745863 | 2.52752352859992  | 1.98743385187252  |
| C | -2.89466084649539 | -0.11398011683058 | 0.16653158040425  |
| N | -4.11431845577869 | 0.23453902437040  | 0.03534294385223  |
| H | -4.67052190061457 | -0.54569072425125 | -0.31031907205513 |

**1a**<sup>=NH\_C-N cleav</sup> E = -625.005306949168 au

ZPE = 0.13862108 au

G<sub>corr</sub> = 0.10430749 au

|   |                   |                   |                   |
|---|-------------------|-------------------|-------------------|
| N | -0.43565090672810 | 0.14148772202574  | -0.33579162468415 |
| N | -4.24478629426405 | -0.03595382211694 | 0.73078721255054  |
| P | -1.60369388898627 | 0.75042310736348  | 0.73117520377319  |
| H | -2.09096988443994 | 1.97656399111150  | 0.12861200889585  |
| C | -4.35672361335101 | 0.56738991688205  | 2.04392080456391  |
| H | -3.91945138800700 | 1.56380206757659  | 2.05234729926579  |
| H | -5.41099115517876 | 0.67821583069209  | 2.28304202813632  |
| H | -3.87967320504109 | -0.02157581123695 | 2.83014995479493  |
| H | -5.00135234414840 | -0.63982021978946 | 0.45164232185590  |
| C | 0.87565761504301  | 0.75075192324070  | -0.36900148625461 |
| H | 0.90529770208588  | 1.73027360214466  | -0.86398498687748 |
| H | 1.24675665734941  | 0.88415174582177  | 0.64712072823887  |
| H | 1.57098608143500  | 0.09154568648121  | -0.88730626401720 |
| H | -0.80871536097914 | -0.16193005253072 | -1.22725841818069 |
| C | -3.06955080356856 | -0.21119622742365 | 0.05320645525713  |
| N | -2.88241693955723 | -0.92795038999799 | -0.98904784824169 |
| H | -3.72308513166374 | -1.42991227024409 | -1.27944321907663 |

**1a**<sup>=O\_P-C cleav</sup> E = -986.405400693603 au

ZPE = 0.13621371 au

G<sub>corr</sub> = 0.09933156 au

|   |                   |                  |                  |
|---|-------------------|------------------|------------------|
| N | -2.11156143551578 | 0.59522968952896 | 1.64809986506449 |
| H | -1.45575728896183 | 0.14091352068000 | 2.26501047194279 |

|   |                   |                   |                   |
|---|-------------------|-------------------|-------------------|
| C | -1.08960732288272 | 2.84754492700852  | 0.34133228978597  |
| H | -1.50237187211847 | 2.60637741428923  | -0.63400192430714 |
| H | -0.94789713083713 | 3.92660182164447  | 0.39181855071984  |
| H | -0.12744713073019 | 2.35540329243773  | 0.45510564173596  |
| N | -3.05627341628783 | -2.51321479878519 | -0.51984444599890 |
| H | -3.77694718620022 | -1.92444898718802 | -0.91738652909387 |
| C | -3.20771670698364 | -3.92482565299503 | -0.81677526798328 |
| H | -4.09066265720617 | -4.38833430597391 | -0.35971736608669 |
| H | -3.27399342167963 | -4.06325030920104 | -1.89498005632974 |
| H | -2.33038140813928 | -4.46803673992312 | -0.46876640395030 |
| P | -2.32149369414860 | 2.35115110297411  | 1.63563998490516  |
| P | -2.57944734020482 | -2.04725338354232 | 1.04655735644123  |
| H | -3.79201491601366 | -2.05569650789647 | 1.83349432655815  |
| H | -1.46315735852661 | 2.52423002483149  | 2.75691721436381  |
| C | -2.76861178147679 | -0.18004487468732 | 0.75190072339680  |
| O | -3.43816388208655 | 0.27990520679793  | -0.16065266116430 |

**1a**<sup>O-C-N cleav</sup> E = -644.887965443286 au

ZPE = 0.12727227 au

G<sub>corr</sub> = 0.09318706 au

|   |                   |                   |                   |
|---|-------------------|-------------------|-------------------|
| N | -0.41919172275156 | 0.14511594398369  | -0.32719777648302 |
| N | -4.21289655857764 | -0.07798541456154 | 0.68521000600654  |
| P | -1.52888432202532 | 0.59734179269685  | 0.87149967326145  |
| H | -1.97314505782635 | 1.93391745556765  | 0.52833120125429  |
| C | -4.43364524251245 | 0.65388220297106  | 1.91268566284766  |
| H | -4.65024201783309 | 1.71035881214618  | 1.74011044178702  |
| H | -5.26735191580490 | 0.21167922413636  | 2.45153293050031  |
| H | -3.55421274901881 | 0.58208357723197  | 2.54936823691586  |
| H | -5.01714442066979 | -0.40076817614378 | 0.16840993048513  |
| C | 0.94894912703066  | 0.61219551102240  | -0.25169208593684 |
| H | 1.07898396077749  | 1.66717426961841  | -0.52344091274035 |
| H | 1.32527795030819  | 0.48358797823632  | 0.76246456640052  |
| H | 1.57505392071248  | 0.01418026291187  | -0.91262205178286 |
| H | -0.80519588195421 | 0.07703207233660  | -1.25940512319482 |
| C | -3.04735302426087 | -0.14909584542018 | -0.00031353181098 |
| O | -2.95762247559379 | -0.67342392673389 | -1.10134910750990 |

**Fe-1a**<sup>P-C cleav</sup> E = -4344.004664451329 au

ZPE = 0.22750801 au

G<sub>corr</sub> = 0.16843671 au

|   |                   |                  |                  |
|---|-------------------|------------------|------------------|
| N | -2.10112602621531 | 0.91814145721596 | 0.75045467384583 |
| H | -1.75421732900783 | 0.75019880586931 | 1.68373414357328 |
| C | -0.50673087102174 | 3.14220259565149 | 0.71075615172407 |
| H | 0.19920969728580  | 2.72032404995249 | 0.00362238555987 |

|    |                   |                   |                   |
|----|-------------------|-------------------|-------------------|
| H  | -0.48729223043406 | 4.22585729254865  | 0.63145694234359  |
| H  | -0.21648513628199 | 2.85394202924792  | 1.71890831993598  |
| C  | -3.03688316632883 | -0.06938336458213 | 0.27959972789015  |
| H  | -3.33509011522323 | 0.18195438482815  | -0.73369945144707 |
| H  | -3.94911314368810 | -0.14196811297520 | 0.88255635075804  |
| N  | -3.61101847968750 | -2.70201432476413 | 0.02323135892672  |
| H  | -4.30813333016815 | -2.56739941996823 | 0.74054625689017  |
| C  | -3.58424306501537 | -4.05887931107362 | -0.50575696477652 |
| H  | -3.19555139858520 | -4.79575957725216 | 0.20028927364377  |
| H  | -4.59535964650034 | -4.34125737591210 | -0.78965877353446 |
| H  | -2.96873169124836 | -4.08374128945882 | -1.39820838356722 |
| P  | -2.17926219037202 | 2.55596199907213  | 0.30633237084351  |
| P  | -2.24090797412681 | -1.73315007240224 | 0.17962806200338  |
| H  | -1.78740142039606 | -1.85531065819970 | 1.52735877242218  |
| H  | -2.93225396840087 | 3.18801250423990  | 1.33116236587695  |
| Fe | -2.95325403491437 | 2.98128640722893  | -1.69962253295571 |
| Fe | -0.65361619881679 | -2.00428727792522 | -1.29786417966904 |
| C  | -4.53740578054973 | 2.40646378882682  | -1.15585584349427 |
| O  | -5.57895723562319 | 2.05726867501029  | -0.78787727561464 |
| C  | -2.63696610469478 | 4.70166088584049  | -1.42708183027702 |
| O  | -2.44037024579738 | 5.82890919303721  | -1.25859896810501 |
| C  | -3.58977045618654 | 3.23909438019671  | -3.32947269474976 |
| O  | -4.00461051054268 | 3.40621285757755  | -4.38979763494912 |
| C  | -1.59342768673424 | 2.05947001884212  | -2.37824047804277 |
| O  | -0.69330468736101 | 1.50920882133742  | -2.84807779339212 |
| C  | 0.29542265412328  | -0.71223063141904 | -0.54323677151988 |
| O  | 0.98902543680764  | 0.08842631343425  | -0.07696149358048 |
| C  | -1.86345792562762 | -1.61061988520442 | -2.53608347712242 |
| O  | -2.64727038272776 | -1.34141974499394 | -3.34217936483404 |
| C  | -0.34703609188757 | -3.61873051685214 | -0.63788354326961 |
| O  | -0.12593645462208 | -4.66624538669268 | -0.19720772382325 |
| C  | 0.56494942397654  | -2.23191928425661 | -2.55686238694582 |
| O  | 1.35747368659460  | -2.37973195602549 | -3.37851337056711 |

**Fe-1a**-C-N *cleav*

E = -2286.709504449469 au

ZPE = 0.18253944 au

G<sub>corr</sub> = 0.13688639 au

|    |                   |                   |                   |
|----|-------------------|-------------------|-------------------|
| C  | -3.30726816071206 | -0.14963744680073 | 0.55950968773500  |
| H  | -3.06608193382707 | -1.15850799413493 | 0.22299898731572  |
| H  | -3.87958816168100 | -0.25103016992510 | 1.47842070981740  |
| N  | -0.57987107084082 | -0.45277487536479 | 0.27412516575988  |
| N  | -4.09969933054160 | 0.53225081039143  | -0.42062644172124 |
| P  | -1.65196394554080 | 0.62440198710882  | 1.02885987031405  |
| H  | -1.69713422897942 | 1.78969218569942  | 0.20926824377905  |
| Fe | -1.19845396332040 | 1.06889663852175  | 3.13853447169549  |

|   |                   |                   |                   |
|---|-------------------|-------------------|-------------------|
| C | 0.08464004458504  | 2.13947409219716  | 2.55414770169477  |
| O | 0.91077064410179  | 2.85263295532394  | 2.16595630143049  |
| C | -2.82499290835338 | 1.74247067905041  | 3.32555371181858  |
| O | -3.88497837675286 | 2.18588936481209  | 3.47102772928762  |
| C | -0.77240834166809 | 1.41383471586709  | 4.81849982717190  |
| O | -0.48969250048405 | 1.64030745892654  | 5.91213058498268  |
| C | -1.00003712829441 | -0.67388294361480 | 3.40923205417455  |
| O | -0.86616081611845 | -1.80551730389118 | 3.60659090320472  |
| C | -4.68921030786457 | 1.78497254896734  | 0.02091142030039  |
| H | -3.96613895186580 | 2.54384996214471  | 0.34393739235106  |
| H | -5.28444630109930 | 2.20431482466348  | -0.78673099013449 |
| H | -5.35377140673576 | 1.59131596808999  | 0.86044669890452  |
| H | -3.59842983555179 | 0.65029694553762  | -1.29052918031528 |
| C | 0.86361903647390  | -0.31186493928197 | 0.41355197219111  |
| H | 1.27356224387756  | 0.56214495249905  | -0.10015417787843 |
| H | 1.11305245394843  | -0.23345004916159 | 1.46660998525101  |
| H | 1.34280062966237  | -1.20627926390709 | 0.02205725584973  |
| H | -0.85488437241717 | -0.70269112371876 | -0.66578077498054 |

**Cr-1a**-P-C cleav

E = -4131.990607062913 au

ZPE = 0.24457818 au

G<sub>corr</sub> = 0.18103495 au

|    |                   |                   |                   |
|----|-------------------|-------------------|-------------------|
| N  | -1.87264911045263 | 0.75288894824305  | 0.54058870584652  |
| H  | -1.38872533787513 | 0.49245777377156  | 1.38871823232886  |
| C  | -0.12225815317594 | 2.83541654515095  | 0.40302145402054  |
| H  | 0.41008878961151  | 2.44777175617160  | -0.45866539323170 |
| H  | -0.00955500333984 | 3.91648223027172  | 0.43006006612201  |
| H  | 0.30510754551818  | 2.41474732060833  | 1.31076182970208  |
| C  | -3.00667263474258 | -0.08445568704884 | 0.24672019624312  |
| H  | -3.44576078203062 | 0.22008347169188  | -0.69559374417830 |
| H  | -3.79754392443223 | -0.04914594512084 | 1.00514766872763  |
| N  | -3.97136227884228 | -2.52234201488264 | -0.40535482248260 |
| H  | -4.72789866874493 | -2.19789889332737 | 0.18206849252266  |
| C  | -4.08532800269275 | -3.94889963372544 | -0.68658932342785 |
| H  | -3.89906191248983 | -4.58752781884599 | 0.18153973475108  |
| H  | -5.08658400771380 | -4.15140314982302 | -1.05892694276998 |
| H  | -3.38733641580360 | -4.22716522256750 | -1.46786416471853 |
| P  | -1.89584458040676 | 2.43562268725554  | 0.25001038438595  |
| P  | -2.46983564752784 | -1.84294925800610 | 0.01189747767838  |
| H  | -2.26843697615116 | -2.17373533602509 | 1.38892516761226  |
| H  | -2.35441509309522 | 2.99008873797042  | 1.47763982495541  |
| Cr | -3.09631484513072 | 3.29085477470156  | -1.54995390041462 |
| Cr | -0.59409111168501 | -2.29351840568659 | -1.25814363875119 |
| C  | -4.65711079728444 | 2.75284035658014  | -0.67020720850083 |
| O  | -5.61467645001236 | 2.41057708408057  | -0.12270004881532 |

|   |                   |                   |                   |
|---|-------------------|-------------------|-------------------|
| C | -3.08906868024990 | 4.91086533766990  | -0.60859685084100 |
| O | -3.08578339724020 | 5.91403107893034  | -0.03949888130594 |
| C | -3.11005861818175 | 1.72548279047118  | -2.58483048317733 |
| O | -3.15352938113213 | 0.79990909141113  | -3.27059201466970 |
| C | -1.48540313543480 | 3.76268762123195  | -2.39202105462324 |
| O | -0.50151111341763 | 4.05637848743840  | -2.91285416601878 |
| C | -4.08474332820269 | 4.11859444026513  | -2.88254421925908 |
| O | -4.70526653631019 | 4.64047449134818  | -3.70274918851372 |
| C | -0.36816082671350 | -0.52846161244199 | -1.85220523237790 |
| O | -0.13301869526495 | 0.52369790463935  | -2.26071988699625 |
| C | -1.66984671291820 | -2.61709636003971 | -2.76772998537646 |
| O | -2.31403861448278 | -2.79837065321934 | -3.70404437994521 |
| C | -0.69714424900724 | -4.07772414293528 | -0.69347793337076 |
| O | -0.72438156955781 | -5.17782167267590 | -0.34666037411598 |
| C | 0.94213793129596  | -2.74019216107228 | -2.19667657342598 |
| O | 1.89888770857723  | -3.02733605464938 | -2.77328081246506 |
| C | 0.38506939765687  | -1.83165178780713 | 0.26152644366973  |
| O | 0.96151631908398  | -1.50584753000248 | 1.20905873520723  |

**Cr-1a**-*C-N cleav*

E = -2180.702469706802 au

ZPE = 0.19122809 au

G<sub>corr</sub> = 0.14448632 au

|    |                   |                   |                   |
|----|-------------------|-------------------|-------------------|
| C  | -3.00449252105425 | -0.32960624430115 | 0.23346572959393  |
| H  | -2.50620990008796 | -0.99850022982203 | -0.46614589442494 |
| H  | -3.35650980062530 | -0.94277366148959 | 1.07032667713739  |
| N  | -0.41548457174046 | 0.41198907233642  | -0.21427293955403 |
| N  | -4.05491146803909 | 0.39431435152280  | -0.44804921511861 |
| P  | -1.66719911403976 | 0.80898524702940  | 0.87770929839306  |
| H  | -2.20666434132927 | 2.03448032672621  | 0.39480085875079  |
| C  | -5.01569802616337 | 1.00229734455306  | 0.45892848065257  |
| H  | -4.53899457997620 | 1.79928136113871  | 1.02678088330427  |
| H  | -5.82260452500831 | 1.45232137950131  | -0.11438057738565 |
| H  | -5.44769314428008 | 0.29608786323461  | 1.18123893215869  |
| H  | -4.53289150256985 | -0.23024898359039 | -1.08346151865657 |
| C  | 0.89263994000012  | 1.04611624564890  | -0.11018144856623 |
| H  | 0.87772581237598  | 2.13012949016571  | -0.25638585494076 |
| H  | 1.32493223425355  | 0.84166512851459  | 0.86272290420918  |
| H  | 1.55115137467248  | 0.60655091777979  | -0.85603136941824 |
| H  | -0.74933964060822 | 0.41461941246639  | -1.16979118068829 |
| Cr | -1.17209843650092 | 0.85010287163968  | 3.15376923930643  |
| C  | -2.51656501267321 | 2.13754491815070  | 3.33151417589281  |
| O  | -3.35253694441871 | 2.92761876926172  | 3.42860212554019  |
| C  | 0.06746167186460  | 2.22377560140739  | 2.85450304722860  |
| O  | 0.81695804895836  | 3.08943884527214  | 2.71170922662904  |
| C  | 0.12547582812730  | -0.48294241425399 | 2.89865817975847  |

|   |                   |                   |                  |
|---|-------------------|-------------------|------------------|
| O | 0.91257998839353  | -1.31326641065258 | 2.75938636980420 |
| C | -0.78120312760953 | 0.93509669943910  | 4.96297755835328 |
| O | -0.53353208731209 | 0.99148018740692  | 6.08892635694259 |
| C | -2.43230379826461 | -0.48448223318748 | 3.52098400569377 |
| O | -3.20638216634443 | -1.29718242589848 | 3.79084734940392 |

**Mo-1a**-*P-C cleav*

E = -2180.570670592234 au

ZPE = 0.24030525 au

G<sub>corr</sub> = 0.17444454 au

|   |                   |                   |                   |
|---|-------------------|-------------------|-------------------|
| N | -1.86065812416993 | 0.76063989302463  | 0.62663054392532  |
| H | -1.40924481137540 | 0.50348640031381  | 1.49356983313984  |
| C | -0.09114177479186 | 2.84128878210709  | 0.45988979288316  |
| H | 0.43779968307017  | 2.44469164400881  | -0.39972452236848 |
| H | 0.01846737565992  | 3.92311298762976  | 0.47167164028340  |
| H | 0.34164782316207  | 2.43414591556528  | 1.37121437953409  |
| C | -3.01084838533234 | -0.05215091758289 | 0.31654681802165  |
| H | -3.41429776532039 | 0.25162033298824  | -0.64271362767220 |
| H | -3.82114896547215 | 0.01913980271890  | 1.05156774038868  |
| N | -4.02232698881336 | -2.51448602346208 | -0.20249224522898 |
| H | -4.74327696506585 | -2.23577569241568 | 0.44896731860882  |
| C | -4.13271641442138 | -3.92214041442779 | -0.56496781371565 |
| H | -3.91275654422432 | -4.60988701990857 | 0.25639168969458  |
| H | -5.14283665820303 | -4.11479323655636 | -0.91885109976421 |
| H | -3.45346544661657 | -4.14146538609461 | -1.38102858647160 |
| P | -1.86582911191795 | 2.44025683045560  | 0.31338738916650  |
| P | -2.50520613585141 | -1.82384355212261 | 0.12682636119081  |
| H | -2.24719525287882 | -2.09575230691326 | 1.50771661188228  |
| H | -2.32240375870291 | 3.01906386440329  | 1.53127253029214  |
| C | -4.84534346011315 | 2.74260199843493  | -0.71247524226653 |
| O | -5.80616693540782 | 2.39685421200946  | -0.17589888213422 |
| C | -3.16704968302794 | 5.08687569346215  | -0.62860954192800 |
| O | -3.18657333739973 | 6.09187365242130  | -0.06587380821125 |
| C | -3.11826483429298 | 1.60267988126968  | -2.72462328882122 |
| O | -3.13823957115452 | 0.65651189484372  | -3.38065451669336 |
| C | -1.37380356753266 | 3.84456926601037  | -2.51860111638586 |
| O | -0.37703509850419 | 4.13817652052737  | -3.01166703118670 |
| C | -4.17356727597889 | 4.18476924136150  | -3.11751917364784 |
| O | -4.77592811187588 | 4.69116294926684  | -3.95973066449640 |
| C | -0.29243606928388 | -0.43291221853865 | -1.89618109981656 |
| O | -0.06007873260345 | 0.63109527144989  | -2.27165836359201 |
| C | -1.76036789280821 | -2.66786142719589 | -2.90814431436938 |
| O | -2.43844319315373 | -2.82599794813959 | -3.82330333365421 |
| C | -0.69217153008165 | -4.30108943397950 | -0.71523747107518 |
| O | -0.74127159719322 | -5.40565021212198 | -0.39053066140999 |
| C | 1.07692234826465  | -2.83607523454098 | -2.36129083820535 |

|    |                   |                   |                   |
|----|-------------------|-------------------|-------------------|
| O  | 2.01527063563739  | -3.12156023349164 | -2.96695015504368 |
| C  | 0.56543003509870  | -1.91885092359039 | 0.33782536968262  |
| O  | 1.16224730933926  | -1.62138742414622 | 1.27978564303526  |
| Mo | -3.13461480864212 | 3.32169835559685  | -1.63592320743769 |
| Mo | -0.55168527802013 | -2.35622618464079 | -1.29340989613252 |

**Mo-1a**-*C-N cleav*      E = -1204.992043390577 au  
 ZPE = 0.18904613 au  
 G<sub>corr</sub> = 0.14018246 au

|    |                   |                   |                   |
|----|-------------------|-------------------|-------------------|
| C  | -2.95215600557907 | -0.28180580537955 | -0.02109625876627 |
| H  | -2.51703766182052 | -0.73288757100124 | -0.91158286317912 |
| H  | -3.09272338581094 | -1.08536251708702 | 0.71305738528388  |
| N  | -0.33631340241840 | 0.44824610371644  | -0.33018003682894 |
| N  | -4.16687513130689 | 0.41145817046770  | -0.38634693665353 |
| P  | -1.65249216870276 | 0.87327301025159  | 0.66936527067134  |
| H  | -2.17900135478929 | 2.08265736356573  | 0.13145558509326  |
| C  | -5.00010737538893 | 0.78011170854442  | 0.74677845482094  |
| H  | -4.49579690120427 | 1.53491846268958  | 1.34624974996568  |
| H  | -5.92563732904848 | 1.22188176780289  | 0.38549508487014  |
| H  | -5.24615402752961 | -0.05928480360769 | 1.41004572630877  |
| H  | -4.69609611165012 | -0.16390202926951 | -1.02741461939838 |
| C  | 0.99408267055656  | 0.99092614420868  | -0.09123293339797 |
| H  | 1.07011387668072  | 2.07162456741378  | -0.24249984970445 |
| H  | 1.30127016197480  | 0.76973813595138  | 0.92455641290644  |
| H  | 1.69709894288590  | 0.49819060738763  | -0.75953404902294 |
| H  | -0.57619418710097 | 0.47554201057841  | -1.31235590609788 |
| C  | -2.60668162597132 | 2.43024799779303  | 3.27181364864413  |
| O  | -3.38327435286506 | 3.27878848633614  | 3.34573489865794  |
| C  | 0.20587154489330  | 2.34074680674165  | 2.87972338938911  |
| O  | 1.01357735593179  | 3.15520506893976  | 2.76869429154620  |
| C  | 0.10063582721811  | -0.58491272331678 | 2.94704879590524  |
| O  | 0.85025062103002  | -1.45400238218289 | 2.85253773358293  |
| C  | -0.93050515564608 | 0.99933240761025  | 5.10914671792197  |
| O  | -0.74650041263433 | 1.03790305480627  | 6.24730327777426  |
| C  | -2.70432240561850 | -0.43976455228255 | 3.44047406939899  |
| O  | -3.52771242884825 | -1.21883789398221 | 3.65078147231229  |
| Mo | -1.24170938723719 | 0.93486183330401  | 3.13113288799582  |

**W-1a**-*P-C cleav*      E = -2252.110845399768 au  
 ZPE = 0.22131713 au  
 G<sub>corr</sub> = 0.15551698 au

|   |                   |                  |                  |
|---|-------------------|------------------|------------------|
| N | -1.71223230643165 | 0.74073988099703 | 0.42177399179715 |
| H | -0.83972281058423 | 0.40794090704413 | 0.03725168454886 |
| C | -0.29790391290679 | 3.05806782559354 | 0.61491321809585 |



|   |                   |                   |                   |
|---|-------------------|-------------------|-------------------|
| H | 0.25435247983514  | 2.87254509123357  | -0.30246680875062 |
| H | -0.32610745658539 | 4.13297831083192  | 0.77384352676352  |
| H | 0.20196952212191  | 2.58191020151063  | 1.45389123088521  |
| N | -3.78917303354470 | -2.48925800401441 | -0.27796225029776 |
| H | -4.49873032250529 | -1.99046590935427 | 0.24473808062383  |
| C | -4.03662965323808 | -3.91340990269563 | -0.43134557363881 |
| H | -3.93940530137034 | -4.48084987187280 | 0.49958580819979  |
| H | -5.04151206787521 | -4.05546214638276 | -0.82073371087095 |
| H | -3.34458896643907 | -4.33303207023380 | -1.15606066020411 |
| P | -2.01675746594840 | 2.47083774517900  | 0.41858877951823  |
| P | -2.24046976615497 | -1.93133244744691 | 0.06852368517270  |
| H | -1.93476190378255 | -2.31329270145376 | 1.41339037280450  |
| H | -2.49640798833729 | 2.59684551486337  | 1.73941406303029  |
| C | -5.07390341257807 | 2.99811695726102  | -0.31253664865920 |
| O | -6.02351645832397 | 2.78812445934828  | 0.30111577230384  |
| C | -3.21866264413853 | 5.21685004300929  | -0.50873513052127 |
| O | -3.10469563801356 | 6.24144578845771  | 0.00962703378663  |
| C | -3.50834870165435 | 1.53784481900817  | -2.25499361139742 |
| O | -3.55111998843029 | 0.47647304479888  | -2.70037812814982 |
| C | -1.69937506006430 | 3.78039649197599  | -2.48336098288909 |
| O | -0.74384330452208 | 4.01132713685434  | -3.08598532340646 |
| C | -4.51309884445455 | 4.18920699069206  | -2.88006795720753 |
| O | -5.15703404594272 | 4.64861625937005  | -3.71931180732216 |
| C | -0.28581873508787 | -0.46730903857133 | -2.20573921986509 |
| O | -0.18784548189067 | 0.61591201900423  | -2.59719644004676 |
| C | -1.77467970397681 | -2.76744836976893 | -2.98752534337182 |
| O | -2.55513955543225 | -2.97475538291330 | -3.80516820612187 |
| C | -0.43267525157542 | -4.33280259855205 | -0.90766446555072 |
| O | -0.44243219596496 | -5.43309553472707 | -0.56713640524070 |
| C | 1.12701045828086  | -2.84304776251736 | -2.77152616869702 |
| O | 1.99595614041033  | -3.12003135782589 | -3.47723548837645 |
| C | 0.92597165995986  | -1.93917602957716 | -0.03525131977475 |
| O | 1.65508851961810  | -1.66712221099188 | 0.81821475544079  |
| W | -3.38755645905058 | 3.39327967312678  | -1.40779054414281 |
| W | -0.38767323913975 | -2.38082780885006 | -1.52507291487709 |
| C | -2.72602649386542 | -0.14809465787575 | 0.48238201207018  |
| O | -3.87154323041583 | 0.13829668546513  | 0.78603131433900  |

**W-1a**-C-N *cleav*

E = -1277.738219748889 au

ZPE = 0.17020066 au

G<sub>corr</sub> = 0.12014446 au

|   |                   |                   |                   |
|---|-------------------|-------------------|-------------------|
| N | -0.51998673001718 | 0.17208778901321  | -0.35854151439973 |
| N | -4.31171443877165 | -0.33823899999622 | 0.54277028072007  |
| P | -1.74382679013491 | 0.77335756729421  | 0.61713839349221  |
| H | -2.32768705570151 | 1.89583495499924  | -0.05501738154315 |

|   |                   |                   |                   |
|---|-------------------|-------------------|-------------------|
| C | -4.84752243920458 | 0.76305583151431  | 1.31599116553814  |
| H | -4.33491334332816 | 1.68895419800788  | 1.07786208770961  |
| H | -5.89366096476198 | 0.89499074261036  | 1.05459668626712  |
| H | -4.77505421765322 | 0.59035884476154  | 2.38750336688432  |
| H | -4.93796292460161 | -1.08767140818240 | 0.28921991062884  |
| C | 0.71523221575902  | 0.89388813016043  | -0.58476091099138 |
| H | 0.59869071630641  | 1.78134933825814  | -1.21500687423657 |
| H | 1.14266475503142  | 1.20976865410944  | 0.36289236119255  |
| H | 1.43158533042743  | 0.22657877623993  | -1.05785702824996 |
| H | -0.85175003699343 | -0.40604157297968 | -1.11798630266086 |
| C | -2.65661864159497 | 2.52132513223755  | 3.22342095613828  |
| O | -3.50088812215052 | 3.30084767750612  | 3.34266655849954  |
| C | 0.07119321724741  | 2.68815138883164  | 2.44289518033178  |
| O | 0.75776271495284  | 3.56064663751688  | 2.12977373357822  |
| C | 0.35957836508424  | -0.19482836976938 | 2.79235175180566  |
| O | 1.21844734442123  | -0.95156238112785 | 2.67540396282680  |
| C | -0.62432891993128 | 1.44740397151099  | 4.93166288604502  |
| O | -0.31273669458291 | 1.61326830875270  | 6.03102583176392  |
| C | -2.40185054803559 | -0.35445642848190 | 3.57622689876460  |
| O | -3.10742274044921 | -1.21036412528997 | 3.89387080658437  |
| W | -1.15903975043520 | 1.16259058556787  | 3.01494346174088  |
| C | -3.05050296219405 | -0.52155978890657 | 0.11477259575796  |
| O | -2.70532855868785 | -1.47101883415854 | -0.57254329418837 |

**B-1a**<sup>P-C cleav</sup>

E = -965.647309504553 au

ZPE = 0.21665475 au

G<sub>corr</sub> = 0.17642487 au

|   |                   |                   |                   |
|---|-------------------|-------------------|-------------------|
| N | -2.76106508658806 | 0.95796059894750  | 1.21266924511258  |
| H | -2.35056653339997 | 0.68081721855039  | 2.08966951996143  |
| C | -0.36043612613971 | 2.24512675410999  | 0.26984765268636  |
| H | -0.11555025329815 | 1.49146786501691  | -0.47139185114328 |
| H | 0.00106777997598  | 3.21376289470168  | -0.07035754896137 |
| H | 0.12413511181218  | 1.99060664974693  | 1.20929552337378  |
| C | -3.49802649882939 | -0.05864437611648 | 0.50440369558939  |
| H | -3.76998800978131 | 0.31389365539000  | -0.47926629988434 |
| H | -4.42818463396391 | -0.30533335220520 | 1.02336601897614  |
| N | -3.64501829253812 | -2.59200971416110 | -0.56999160702691 |
| H | -4.51022325043378 | -2.76456280591181 | -0.08080629597133 |
| C | -3.20316595217903 | -3.71556824619573 | -1.38933182999984 |
| H | -2.90723626915038 | -4.59146469211979 | -0.80606143518897 |
| H | -4.00943563960819 | -3.99885827340412 | -2.06262812807815 |
| H | -2.35620347212451 | -3.40666136225927 | -1.99204636640577 |
| P | -2.17044447769964 | 2.33890536500554  | 0.43762347091310  |
| P | -2.53342366907046 | -1.61225657830287 | 0.22819859066782  |
| H | -2.41231611942731 | -2.07805877440770 | 1.56971747531260  |

|   |                   |                   |                   |
|---|-------------------|-------------------|-------------------|
| H | -2.30913902161582 | 3.30844145457117  | 1.45338421052334  |
| H | -2.78860549206948 | 1.90024962739543  | -1.96530794798839 |
| H | -4.26677830291858 | 2.81640917825614  | -0.90976182424823 |
| H | -2.61373133267830 | 3.83820546349034  | -1.46640079417668 |
| H | -0.98262034880461 | -0.89968243810644 | -1.64695483651933 |
| H | -0.21718511938414 | -0.78553441921175 | 0.22682108976508  |
| H | -0.37764462547704 | -2.56952723446985 | -0.65351333308129 |
| B | -0.82438655168270 | -1.44879659645196 | -0.58374074323957 |
| B | -3.08903595292544 | 2.76300375814205  | -1.17313357096816 |

**B-1a**<sup>-C-N cleav</sup>

E = -597.538405624394 au

ZPE = 0.17675871 au

G<sub>corr</sub> = 0.14103255 au

|   |                   |                   |                   |
|---|-------------------|-------------------|-------------------|
| C | -2.92926073699092 | -0.28723733556363 | -0.12242435293063 |
| H | -2.85928330134013 | -0.44225875901490 | -1.19991749533704 |
| H | -2.74402752269445 | -1.25823969390692 | 0.36050306236476  |
| N | -0.15134994814383 | 0.16078930438847  | -0.13441256762771 |
| H | 0.60424068338542  | 0.30021360908591  | 0.51826762758289  |
| C | 0.24257333068745  | 0.23683303301659  | -1.53202942626150 |
| H | 0.46869084064041  | 1.25401631707336  | -1.86789837769554 |
| H | 1.12116139295471  | -0.38339974282816 | -1.69547424936354 |
| H | -0.55052211323715 | -0.15697851108597 | -2.16373435214559 |
| N | -4.19892728072600 | 0.32898603847299  | 0.18827319491934  |
| H | -4.26072287018091 | 0.48491325244035  | 1.18609207632782  |
| C | -5.33939297885528 | -0.44530752683156 | -0.26968474476200 |
| H | -6.25781837431619 | 0.04512776432519  | 0.04583829059723  |
| H | -5.34407991272959 | -0.48210323020727 | -1.35889156144885 |
| H | -5.35571419002037 | -1.48082718772090 | 0.09999945139860  |
| P | -1.58704196394997 | 0.84501033615112  | 0.42026689883186  |
| H | -1.83952579322280 | 1.97306931538628  | -0.39891349861888 |
| H | -2.64340618363562 | 1.61862684973403  | 2.57032463517098  |
| H | -1.36228382527170 | 0.07093995233907  | 2.77853961665902  |
| H | -0.65836237341258 | 1.95311646334742  | 2.49064108332622  |
| B | -1.55508298894045 | 1.16507498139852  | 2.29593901901258  |

**O-1a**<sup>-P-C cleav</sup>

E = -1062.820296972539 au

ZPE = 0.16424101 au

G<sub>corr</sub> = 0.12612563 au

|   |                   |                  |                   |
|---|-------------------|------------------|-------------------|
| N | -3.11556128666159 | 1.10831066659478 | 1.38022402642146  |
| H | -2.80083385398562 | 0.83012897423457 | 2.29781712956674  |
| C | -0.57829994760439 | 2.05973661411872 | 0.40773198064952  |
| H | -0.48218771211435 | 1.20411159222478 | -0.25487984392316 |
| H | -0.08805368322445 | 2.92761274752712 | -0.02867830458873 |
| H | -0.10558929110371 | 1.81984152004109 | 1.35935097062914  |

|   |                   |                   |                   |
|---|-------------------|-------------------|-------------------|
| C | -3.68837978064387 | 0.06202957847941  | 0.56401270517372  |
| H | -3.93850685965594 | 0.47907003004995  | -0.40970060061980 |
| H | -4.61774437582623 | -0.30697454709751 | 1.00766364475257  |
| N | -3.48732070195092 | -2.48630806846359 | -0.47012389066248 |
| H | -4.41456977444072 | -2.61925276999406 | -0.09480973032914 |
| C | -2.87649239792630 | -3.69373840960637 | -1.01306376006769 |
| H | -2.71968138179094 | -4.47533735102252 | -0.26427645380665 |
| H | -3.50118778010758 | -4.09227010655332 | -1.80969900514626 |
| H | -1.91532993737206 | -3.43022369708896 | -1.44324733323366 |
| P | -2.33727087533060 | 2.42321177463102  | 0.63835634553275  |
| P | -2.53113065604105 | -1.34071948192402 | 0.29550370617382  |
| H | -2.28631105981964 | -1.77133536958294 | 1.63810733606095  |
| H | -2.34653023810416 | 3.33102369633753  | 1.73029183875452  |
| O | -3.05084348009771 | 2.85688350353084  | -0.59752316359203 |
| O | -1.25132130619801 | -1.05389270643649 | -0.41840086774559 |

**O-1a**<sup>C-N cleav</sup>

E = -646.122209272900 au

ZPE = 0.15073494 au

G<sub>corr</sub> = 0.11625838 au

|   |                   |                   |                   |
|---|-------------------|-------------------|-------------------|
| C | -2.95631887533155 | -0.27057828322276 | -0.20309636152799 |
| H | -2.87642203987722 | -0.44755138249653 | -1.27857068479988 |
| H | -2.77038737717834 | -1.23347093490753 | 0.29868090381897  |
| N | -0.18928556668304 | 0.13612164149303  | -0.15934363285460 |
| H | 0.53553985662326  | 0.31790021723256  | 0.51987002679254  |
| C | 0.26148606478663  | 0.23184225627962  | -1.54134407402884 |
| H | 0.47807866571358  | 1.25466147877060  | -1.86795766671807 |
| H | 1.15984513268339  | -0.36714947257656 | -1.66960085744457 |
| H | -0.49283476061097 | -0.17947683052330 | -2.20890431016878 |
| N | -4.22845082629425 | 0.34884347185622  | 0.09390475398354  |
| H | -4.25787109375992 | 0.57832619973188  | 1.07933133310154  |
| C | -5.36771018718499 | -0.47748175273322 | -0.26274644339690 |
| H | -6.28584135896194 | 0.02036668597530  | 0.04263444252750  |
| H | -5.40570723484172 | -0.60253774629189 | -1.34480565200073 |
| H | -5.35142821104370 | -1.48088659348575 | 0.18811535023609  |
| P | -1.63311988050579 | 0.87759169077542  | 0.31166856894612  |
| H | -1.80522885316100 | 1.96992436896057  | -0.58745546756975 |
| O | -1.67679181437240 | 1.23576164516233  | 1.76179501110380  |

**W-1a**<sup>C-C-N cleav</sup>

E = -1241.810811806963 au

ZPE = 0.19355199 au

G<sub>corr</sub> = 0.14376769 au

|   |                   |                   |                   |
|---|-------------------|-------------------|-------------------|
| N | -0.66291229030406 | 0.27888147711664  | -0.53429048234479 |
| N | -4.45956076384357 | -0.07644164445437 | 0.24114913725439  |
| P | -1.85291869894771 | 0.76770253480234  | 0.57308905736786  |

|   |                   |                   |                   |
|---|-------------------|-------------------|-------------------|
| H | -2.50130275012076 | 1.89055215545963  | -0.01881113529422 |
| C | -4.96135853670311 | 0.88617105855710  | 1.20890191313096  |
| H | -4.41135699359096 | 1.81956768595502  | 1.14112405280249  |
| H | -5.99686976629020 | 1.11019567895058  | 0.96717586972364  |
| H | -4.91147075343073 | 0.53534093883653  | 2.24277294270254  |
| H | -5.09422518907385 | -0.85257472521221 | 0.11848379063147  |
| C | 0.61150971187442  | 0.97847698982681  | -0.60781461246084 |
| H | 0.53368883166932  | 2.01324305267212  | -0.95457174755158 |
| H | 1.08372371511544  | 0.98431569026310  | 0.36840446946347  |
| H | 1.26740170777467  | 0.43561304225242  | -1.28448595119594 |
| H | -1.04674704206703 | 0.06290702719213  | -1.44375931504127 |
| C | -2.55919113094769 | 2.50089135276110  | 3.21398261191489  |
| O | -3.36809617583542 | 3.31104473107825  | 3.36300755566821  |
| C | 0.16167686112168  | 2.55929355455640  | 2.38981422785036  |
| O | 0.88059146461151  | 3.41269782402290  | 2.09506881739928  |
| C | 0.29005380774727  | -0.36332934440942 | 2.64404072701891  |
| O | 1.08449983734803  | -1.18152978020937 | 2.47859338823592  |
| C | -0.53912960829917 | 1.28305288586573  | 4.85540217928558  |
| O | -0.19478135596860 | 1.39918438085016  | 5.95162419730080  |
| C | -2.44476428286534 | -0.37630526762420 | 3.50637323504850  |
| O | -3.19175974203489 | -1.19137688453717 | 3.83281253987179  |
| W | -1.12797856952047 | 1.07876889856126  | 2.94327432788633  |
| C | -3.14081082695778 | -0.50626601045690 | 0.25643903295636  |
| C | -2.75297660148409 | -1.76329751954539 | 0.00839115916667  |
| H | -1.71016901645850 | -2.02205981108874 | -0.06801818140516 |
| H | -3.47639177251818 | -2.55624899204252 | -0.13521648738681 |

**W-1a**<sup>C-P-C cleav</sup>

E = -2216.183917647167 au

ZPE = 0.24436919 au

G<sub>corr</sub> = 0.17711744 au

|   |                   |                   |                   |
|---|-------------------|-------------------|-------------------|
| N | -2.01217624229118 | 0.76231429067572  | 0.58162707136165  |
| H | -1.19165033753599 | 0.45209194872262  | 1.07954479588483  |
| C | -0.49321040506981 | 2.97637629473930  | 0.83044760373309  |
| H | 0.16827615282161  | 2.68706733310146  | 0.01944969680937  |
| H | -0.47435059053090 | 4.05904995530171  | 0.91848834032471  |
| H | -0.14521638129928 | 2.54324281937779  | 1.76574918281221  |
| N | -3.59336763845369 | -2.86961367122038 | 0.34104994554216  |
| H | -4.12695121951371 | -2.70133032796032 | 1.18072191526005  |
| C | -3.64084427410258 | -4.24998748584222 | -0.11549916745377 |
| H | -3.06217802166490 | -4.94052184558725 | 0.50170096855139  |
| H | -4.67840857072612 | -4.57616936036859 | -0.12239940609052 |
| H | -3.27381965844403 | -4.31200055514003 | -1.13369428021191 |
| P | -2.19956438880580 | 2.46376551667131  | 0.42171803354175  |
| P | -2.23569865488689 | -1.88621057282514 | 0.17424974613251  |
| H | -1.60326477925699 | -1.87678102362463 | 1.45682062470581  |

|   |                   |                   |                   |
|---|-------------------|-------------------|-------------------|
| H | -2.85012930556496 | 2.81625100266202  | 1.63440892843896  |
| C | -5.08169444528219 | 3.33821952079796  | -0.82861629468501 |
| O | -6.15030536659387 | 3.25609903234639  | -0.39970374271153 |
| C | -2.99744874321974 | 5.28213643308269  | -0.58341094665084 |
| O | -2.86838437234514 | 6.27019950709232  | 0.00005269490951  |
| C | -3.38693972103315 | 1.75368238667189  | -2.60538355536202 |
| O | -3.48992434282760 | 0.77431388704946  | -3.20043938717979 |
| C | -1.33652933575907 | 3.80090903417122  | -2.38008771386693 |
| O | -0.29542559425488 | 4.00496859151950  | -2.82828767916884 |
| C | -3.97241273950712 | 4.51014341375750  | -3.17285334190375 |
| O | -4.41214485455744 | 5.08054073198934  | -4.07460999171410 |
| C | -0.44855712408433 | -0.29962811081700 | -2.06197516344880 |
| O | -0.27599707864969 | 0.81280012825971  | -2.31152084598101 |
| C | -2.14707033339462 | -2.49964973277288 | -2.95889376823364 |
| O | -3.03353108164882 | -2.62240737750113 | -3.68254749013443 |
| C | -0.53525728390572 | -4.29646686006083 | -1.27010911660410 |
| O | -0.44866772421624 | -5.42900768868743 | -1.06980591503783 |
| C | 0.76912830016820  | -2.60083641159711 | -3.10119648088449 |
| O | 1.54671531042696  | -2.78349984263794 | -3.93389159170827 |
| C | 0.86226203618259  | -2.02557105431919 | -0.24699232842772 |
| O | 1.64641305315882  | -1.84567841985683 | 0.58186578676522  |
| W | -3.20457889165109 | 3.52798393815612  | -1.59463709456626 |
| W | -0.58664665591691 | -2.29014401755641 | -1.64676386597564 |
| C | -2.96785678959331 | -0.20368052472392 | 0.31260790842067  |
| C | -4.26652862786238 | 0.01025171364473  | 0.10159022482515  |
| H | -4.90316010895624 | -0.79715228336972 | -0.22028999833004 |
| H | -4.71332811935160 | 0.98565759667816  | 0.20421701831230  |

**W-1a**<sup>=NH<sub>2</sub>-C-N cleav</sup>

E = -1257.859322016114 au

ZPE = 0.18230180 au

G<sub>corr</sub> = 0.13237373 au

|   |                   |                   |                   |
|---|-------------------|-------------------|-------------------|
| N | -0.72166232950187 | 0.57740623643303  | -0.70576695407789 |
| N | -4.33599038075524 | -0.30118135109102 | 0.53800000305608  |
| P | -1.83165944038590 | 0.91937196621422  | 0.52722334128894  |
| H | -2.54953122255075 | 2.02058458966895  | -0.00106181845798 |
| C | -4.92665043451048 | 0.83458611669590  | 1.21799528329657  |
| H | -4.51696493791327 | 1.76558982119474  | 0.84113397137691  |
| H | -5.99313241715820 | 0.84566774013538  | 1.01052252789496  |
| H | -4.78323549104522 | 0.80486540897987  | 2.29746431255988  |
| H | -4.88299237414737 | -1.14789484063685 | 0.55535566931072  |
| C | 0.64988357918194  | 1.04562279663390  | -0.59259235693690 |
| H | 0.67981310897054  | 2.13270685768170  | -0.57504742494343 |
| H | 1.17878686166326  | 0.67796283992554  | 0.29003966539364  |
| H | 1.19439505680414  | 0.72114233310726  | -1.47604432540712 |
| H | -0.81406732899570 | -0.40661152589433 | -0.94639308136569 |

|   |                   |                   |                   |
|---|-------------------|-------------------|-------------------|
| C | -2.56209102785004 | 2.59123880810778  | 3.15354403176923  |
| O | -3.36439999436332 | 3.41553025049152  | 3.25789633686536  |
| C | 0.21800726862663  | 2.55408307167353  | 2.42274444095522  |
| O | 0.99648005670338  | 3.36214461395537  | 2.15604303471011  |
| C | 0.21431611326184  | -0.35452673312153 | 2.64700574732025  |
| O | 0.97833183224450  | -1.20380042014661 | 2.49696365040032  |
| C | -0.62074784072043 | 1.30679967822894  | 4.85869230154488  |
| O | -0.31302399767189 | 1.41136739414373  | 5.96682983388233  |
| C | -2.51078279635180 | -0.30596803778483 | 3.43147581554598  |
| O | -3.26867198022597 | -1.13094045729873 | 3.71191382453027  |
| W | -1.16107157628606 | 1.13305702266357  | 2.92897983026419  |
| C | -3.02920990013942 | -0.47355550138745 | 0.20741951816029  |
| N | -2.47140782573412 | -1.52111648937822 | -0.27038790061360 |
| H | -3.11010422114904 | -2.30642453919543 | -0.38809559832368 |

**W-1a**<sup>=NH<sub>2</sub>P-C<sub>2</sub>cleav</sup>

E = -2232.235553079767 au

ZPE = 0.23377503 au

G<sub>corr</sub> = 0.16664760 au

|   |                   |                   |                   |
|---|-------------------|-------------------|-------------------|
| N | -1.80232353353612 | 0.78472057987201  | 0.58313724468233  |
| H | -0.84836405742188 | 0.51308177462060  | 0.40815230240716  |
| C | -0.55458187141305 | 3.16129043596411  | 0.94228813632015  |
| H | 0.14607325910554  | 3.01012930205089  | 0.12520948794543  |
| H | -0.66263368040016 | 4.23240029684063  | 1.09083502419111  |
| H | -0.16860220951341 | 2.70984791273519  | 1.85240849032170  |
| N | -3.58607561600776 | -2.76041040924064 | 0.37867610328225  |
| H | -3.96786821762819 | -2.72515730941329 | 1.31266038146437  |
| C | -3.84412391078834 | -4.03188941521215 | -0.28611358934865 |
| H | -3.33699929429990 | -4.87881249875922 | 0.17881270285250  |
| H | -4.91582419719964 | -4.21737659718748 | -0.27715246390879 |
| H | -3.53293952200892 | -3.97330158827095 | -1.32200922397229 |
| P | -2.18931481029619 | 2.48398358657976  | 0.47871205728846  |
| P | -2.13139146579791 | -1.90888890544985 | 0.21168779445784  |
| H | -1.52340859892149 | -2.00617295894765 | 1.49217617657905  |
| H | -2.88551145503680 | 2.61916742112325  | 1.69864648792619  |
| C | -5.10685112331375 | 3.07828148012713  | -0.65584023204024 |
| O | -6.13237196713211 | 2.88039985619685  | -0.17354451256740 |
| C | -3.19426512195405 | 5.25103219810982  | -0.55535109263903 |
| O | -3.12800337068267 | 6.26132629117524  | 0.00040065661176  |
| C | -3.37324017499382 | 1.63995838115282  | -2.44568313607270 |
| O | -3.42280566580808 | 0.61324579368791  | -2.96658496004688 |
| C | -1.46354254667998 | 3.82552174699076  | -2.34700412085090 |
| O | -0.43109936103773 | 4.05478082480598  | -2.80861099064829 |
| C | -4.18803670152017 | 4.33135129873331  | -3.09132505602086 |
| O | -4.70440929492864 | 4.83985510474658  | -3.99020572773609 |
| C | -0.32643548386953 | -0.37844078856484 | -2.09112136908120 |

|   |                   |                   |                   |
|---|-------------------|-------------------|-------------------|
| O | -0.13620004503352 | 0.73086512435963  | -2.34447914186980 |
| C | -2.08141385313951 | -2.48948151532043 | -3.00369717503840 |
| O | -2.93371493532017 | -2.57986031303655 | -3.77080487611063 |
| C | -0.64674085498871 | -4.36292362302491 | -1.27335531827649 |
| O | -0.66828864341022 | -5.49733244090921 | -1.07136265132032 |
| C | 0.79514001489234  | -2.75016951890028 | -3.10352086590648 |
| O | 1.56552350843967  | -2.98607651786002 | -3.92842744310024 |
| C | 0.95214230206744  | -2.19652942103023 | -0.28294655163931 |
| O | 1.78309640605402  | -2.09007562936992 | 0.51068138732162  |
| W | -3.28738709647125 | 3.45775897965729  | -1.51766681854557 |
| W | -0.54382002302151 | -2.35702638846184 | -1.65376607046371 |
| C | -2.77354731576793 | -0.15850639218295 | 0.40252085499819  |
| N | -4.00269563162242 | 0.16482327866973  | 0.39202744200726  |
| H | -4.59337435959327 | -0.64877309705718 | 0.23373490654697  |

**W-1a**<sup>=O-C-N cleav</sup>

E = -1277.738219748889 au

ZPE = 0.17020066 au

G<sub>corr</sub> = 0.12014446 au

|   |                   |                   |                   |
|---|-------------------|-------------------|-------------------|
| N | -0.51998673001718 | 0.17208778901321  | -0.35854151439973 |
| N | -4.31171443877165 | -0.33823899999622 | 0.54277028072007  |
| P | -1.74382679013491 | 0.77335756729421  | 0.61713839349221  |
| H | -2.32768705570151 | 1.89583495499924  | -0.05501738154315 |
| C | -4.84752243920458 | 0.76305583151431  | 1.31599116553814  |
| H | -4.33491334332816 | 1.68895419800788  | 1.07786208770961  |
| H | -5.89366096476198 | 0.89499074261036  | 1.05459668626712  |
| H | -4.77505421765322 | 0.59035884476154  | 2.38750336688432  |
| H | -4.93796292460161 | -1.08767140818240 | 0.28921991062884  |
| C | 0.71523221575902  | 0.89388813016043  | -0.58476091099138 |
| H | 0.59869071630641  | 1.78134933825814  | -1.21500687423657 |
| H | 1.14266475503142  | 1.20976865410944  | 0.36289236119255  |
| H | 1.43158533042743  | 0.22657877623993  | -1.05785702824996 |
| H | -0.85175003699343 | -0.40604157297968 | -1.11798630266086 |
| C | -2.65661864159497 | 2.52132513223755  | 3.22342095613828  |
| O | -3.50088812215052 | 3.30084767750612  | 3.34266655849954  |
| C | 0.07119321724741  | 2.68815138883164  | 2.44289518033178  |
| O | 0.75776271495284  | 3.56064663751688  | 2.12977373357822  |
| C | 0.35957836508424  | -0.19482836976938 | 2.79235175180566  |
| O | 1.21844734442123  | -0.95156238112785 | 2.67540396282680  |
| C | -0.62432891993128 | 1.44740397151099  | 4.93166288604502  |
| O | -0.31273669458291 | 1.61326830875270  | 6.03102583176392  |
| C | -2.40185054803559 | -0.35445642848190 | 3.57622689876460  |
| O | -3.10742274044921 | -1.21036412528997 | 3.89387080658437  |
| W | -1.15903975043520 | 1.16259058556787  | 3.01494346174088  |
| C | -3.05050296219405 | -0.52155978890657 | 0.11477259575796  |
| O | -2.70532855868785 | -1.47101883415854 | -0.57254329418837 |



W-1a<sup>=O</sup>-P-C<sup>cleav</sup>

E = -2252.110845399768 au

ZPE = 0.22131713 au

G<sub>corr</sub> = 0.15551698 au

|   |                   |                   |                   |
|---|-------------------|-------------------|-------------------|
| N | -1.71223230643165 | 0.74073988099703  | 0.42177399179715  |
| H | -0.83972281058423 | 0.40794090704413  | 0.03725168454886  |
| C | -0.29790391290679 | 3.05806782559354  | 0.61491321809585  |
| H | 0.25435247983514  | 2.87254509123357  | -0.30246680875062 |
| H | -0.32610745658539 | 4.13297831083192  | 0.77384352676352  |
| H | 0.20196952212191  | 2.58191020151063  | 1.45389123088521  |
| N | -3.78917303354470 | -2.48925800401441 | -0.27796225029776 |
| H | -4.49873032250529 | -1.99046590935427 | 0.24473808062383  |
| C | -4.03662965323808 | -3.91340990269563 | -0.43134557363881 |
| H | -3.93940530137034 | -4.48084987187280 | 0.49958580819979  |
| H | -5.04151206787521 | -4.05546214638276 | -0.82073371087095 |
| H | -3.34458896643907 | -4.33303207023380 | -1.15606066020411 |
| P | -2.01675746594840 | 2.47083774517900  | 0.41858877951823  |
| P | -2.24046976615497 | -1.93133244744691 | 0.06852368517270  |
| H | -1.93476190378255 | -2.31329270145376 | 1.41339037280450  |
| H | -2.49640798833729 | 2.59684551486337  | 1.73941406303029  |
| C | -5.07390341257807 | 2.99811695726102  | -0.31253664865920 |
| O | -6.02351645832397 | 2.78812445934828  | 0.30111577230384  |
| C | -3.21866264413853 | 5.21685004300929  | -0.50873513052127 |
| O | -3.10469563801356 | 6.24144578845771  | 0.00962703378663  |
| C | -3.50834870165435 | 1.53784481900817  | -2.25499361139742 |
| O | -3.55111998843029 | 0.47647304479888  | -2.70037812814982 |
| C | -1.69937506006430 | 3.78039649197599  | -2.48336098288909 |
| O | -0.74384330452208 | 4.01132713685434  | -3.08598532340646 |
| C | -4.51309884445455 | 4.18920699069206  | -2.88006795720753 |
| O | -5.15703404594272 | 4.64861625937005  | -3.71931180732216 |
| C | -0.28581873508787 | -0.46730903857133 | -2.20573921986509 |
| O | -0.18784548189067 | 0.61591201900423  | -2.59719644004676 |
| C | -1.77467970397681 | -2.76744836976893 | -2.98752534337182 |
| O | -2.55513955543225 | -2.97475538291330 | -3.80516820612187 |
| C | -0.43267525157542 | -4.33280259855205 | -0.90766446555072 |
| O | -0.44243219596496 | -5.43309553472707 | -0.56713640524070 |
| C | 1.12701045828086  | -2.84304776251736 | -2.77152616869702 |
| O | 1.99595614041033  | -3.12003135782589 | -3.47723548837645 |
| C | 0.92597165995986  | -1.93917602957716 | -0.03525131977475 |
| O | 1.65508851961810  | -1.66712221099188 | 0.81821475544079  |
| W | -3.38755645905058 | 3.39327967312678  | -1.40779054414281 |
| W | -0.38767323913975 | -2.38082780885006 | -1.52507291487709 |
| C | -2.72602649386542 | -0.14809465787575 | 0.48238201207018  |
| O | -3.87154323041583 | 0.13829668546513  | 0.78603131433900  |

CH<sub>3</sub>NHCH<sub>3</sub>

E = -134.929342431073 au

ZPE = 0.09143896 au

G<sub>corr</sub> = 0.06601019 au

|   |                   |                   |                   |
|---|-------------------|-------------------|-------------------|
| N | -1.70379473896227 | 1.26907364614147  | -0.04466802614132 |
| H | -1.45489258528378 | 1.75854819608520  | 0.80483907999752  |
| C | -1.19970377945522 | -0.08939844633464 | 0.01725454172512  |
| H | -1.55966420103377 | -0.57588782556224 | 0.92233731760452  |
| H | -1.57924521044577 | -0.65756905936409 | -0.83242508250049 |
| H | -0.10023111689112 | -0.16695285229229 | -0.00182898809891 |
| C | -1.19748943949846 | 2.00260433205722  | -1.18878163084742 |
| H | -1.57702515605110 | 1.55270961845793  | -2.10659082149117 |
| H | -1.55574201630913 | 3.03023691638980  | -1.15648673056179 |
| H | -0.09791488606937 | 2.02309686442163  | -1.26452875968606 |

CH<sub>3</sub>PHNHCH<sub>3</sub>

E = -476.448801946488 au

ZPE = 0.10045657 au

G<sub>corr</sub> = 0.07116709 au

|   |                   |                   |                   |
|---|-------------------|-------------------|-------------------|
| P | -2.14709556838504 | 0.95279959807840  | -0.17799066568701 |
| H | -1.81659075307559 | 1.62608213025266  | 1.04786443707590  |
| C | -0.85954685399559 | -0.36752573098293 | -0.00223501689135 |
| H | -1.12959825710559 | -0.99828239642277 | 0.84388465019252  |
| H | -0.85933188943887 | -0.98410776823905 | -0.89749666280726 |
| H | 0.14574434246869  | 0.01243175134884  | 0.16458120729784  |
| N | -1.42750581017783 | 1.99824931260902  | -1.33636920262953 |
| H | -2.12355031210705 | 2.51989891005527  | -1.84397533665568 |
| C | -0.24357026068586 | 2.78383601260717  | -1.03816278770784 |
| H | 0.05605914222603  | 3.35349948595879  | -1.91737743093360 |
| H | -0.38145111025337 | 3.48345281929269  | -0.20418191504998 |
| H | 0.58570077053008  | 2.12703596544189  | -0.78464627620400 |

(CH<sub>3</sub>)<sub>3</sub>N

E = -174.163628979555 au

ZPE = 0.11898977 au

G<sub>corr</sub> = 0.09171436 au

|   |                   |                   |                   |
|---|-------------------|-------------------|-------------------|
| N | -1.64144609910216 | 1.29482684082829  | 0.00010710128725  |
| C | -1.20731730876542 | -0.08678401743077 | 0.00000779216778  |
| H | -1.59565500665794 | -0.59794461206215 | 0.87951597988646  |
| H | -1.59243703600037 | -0.59680787102963 | -0.88157297452036 |
| H | -0.10843706977570 | -0.19596624281435 | 0.00194611668865  |
| C | -1.20499525253588 | 1.98639186330622  | -1.19510420883879 |
| H | -1.58985793702985 | 1.47959731726743  | -2.07865600438958 |
| H | -1.59182497239524 | 3.00422824773050  | -1.19720824396694 |
| H | -0.10592580758014 | 2.04115656267076  | -1.28733877191958 |
| C | -1.20937143925673 | 1.98484555394563  | 1.19779877440139  |
| H | -1.59621679186488 | 3.00267633521737  | 1.19980825686117  |

|   |                   |                  |                  |
|---|-------------------|------------------|------------------|
| H | -1.59745397755653 | 1.47690529121801 | 2.07928194687972 |
| H | -0.11064663147914 | 2.03949812115268 | 1.29411998546285 |

(CH<sub>3</sub>)<sub>2</sub>NPHCH<sub>3</sub>      E = -515.678572570570 au  
 ZPE = 0.12790505 au  
 G<sub>corr</sub> = 0.09692091 au

|   |                   |                   |                   |
|---|-------------------|-------------------|-------------------|
| P | -2.10673316798691 | 0.76463114759888  | -0.26194110133432 |
| H | -1.95762065952153 | 1.52822264078884  | 0.94867387381891  |
| C | -0.71303025453267 | -0.40226698748987 | 0.08670675706536  |
| H | -1.00332038133723 | -1.03031872907400 | 0.92826464516471  |
| H | -0.56448904884885 | -1.04349410883205 | -0.77829156653024 |
| H | 0.22964221821689  | 0.08032798380415  | 0.33399354783888  |
| N | -1.40964316708479 | 1.82940864827052  | -1.42680938711479 |
| C | -0.28391531955465 | 2.66207336254717  | -1.05352069929110 |
| H | 0.18756589619019  | 3.07577187452982  | -1.94659107048156 |
| H | -0.57741138057426 | 3.50190476838652  | -0.40732581523224 |
| H | 0.46770490699843  | 2.07980365055929  | -0.52852752966501 |
| C | -2.36817732887696 | 2.53040564689183  | -2.26512236841989 |
| H | -1.88396887225402 | 2.85134748005144  | -3.18902744504879 |
| H | -3.18764635607216 | 1.86550570581056  | -2.52502896567025 |
| H | -2.79153843476150 | 3.42293933615687  | -1.78347235509964 |

(CH<sub>3</sub>)<sub>2</sub>PNHCH<sub>3</sub>      E = -515.697499685354 au  
 ZPE = 0.12907068 au  
 G<sub>corr</sub> = 0.09786390 au

|   |                   |                   |                   |
|---|-------------------|-------------------|-------------------|
| P | -2.00135522157806 | 1.06206728163121  | 0.05534873607130  |
| C | -0.78647982762154 | -0.33091948069124 | -0.04410562024287 |
| H | -0.98402581742344 | -1.02826165073496 | 0.76853034294639  |
| H | -0.92577792467054 | -0.85872838669624 | -0.98403438864301 |
| H | 0.25264290935974  | -0.01106611102269 | 0.03018310108294  |
| N | -1.44250794286927 | 2.07694381626484  | -1.21597730630035 |
| H | -2.18705231210041 | 2.63164669534270  | -1.60485634649277 |
| C | -0.16520400934075 | 2.76568061723213  | -1.21191938945746 |
| H | 0.02252905870952  | 3.19744409220161  | -2.19469611356663 |
| H | -0.08874133289292 | 3.56794059468732  | -0.46923831698083 |
| H | 0.63867188011711  | 2.05855948943656  | -1.01806525982933 |
| C | -1.36445140332156 | 1.85119610920720  | 1.61601864653088  |
| H | -1.87727757750643 | 2.79591238214302  | 1.78582913649888  |
| H | -1.59045291451868 | 1.19776528959443  | 2.45763272916845  |
| H | -0.28975093434276 | 2.03155608140411  | 1.60510960921440  |

CH<sub>3</sub>PH<sub>3</sub><sup>+</sup>      E = -382.300394210182 au  
 ZPE = 0.06472835 au

$G_{\text{corr}} = 0.03997554 \text{ au}$

|   |                   |                   |                   |
|---|-------------------|-------------------|-------------------|
| C | -0.31694564992790 | 0.46424124561705  | -1.51545132542782 |
| H | 0.13805160577031  | 1.01070829309096  | -0.69373030548254 |
| H | -0.05388560018587 | 0.93990937805053  | -2.45641383782388 |
| H | -1.39724853769652 | 0.46677757436664  | -1.39792361627803 |
| P | 0.28281113217689  | -1.23235183992768 | -1.51260514220153 |
| H | 1.67145499896552  | -1.30405278284091 | -1.66082638977018 |
| H | -0.02531952315798 | -1.90163599329154 | -0.32409175622493 |
| H | -0.26755952594444 | -1.99101224506505 | -2.55037193679108 |

$\text{NH}_2\text{PH}_3^+$

$E = -398.345925350268 \text{ au}$

$ZPE = 0.05392175 \text{ au}$

$G_{\text{corr}} = 0.02936728 \text{ au}$

|   |                   |                   |                   |
|---|-------------------|-------------------|-------------------|
| N | 0.01804051736173  | -0.83350130982440 | -1.51518671736740 |
| H | -0.04705209178613 | -1.38689452438465 | -0.67395328733329 |
| H | -0.02105657383986 | -1.38053433864310 | -2.36217046386692 |
| P | -0.48665383873271 | 0.71830714993882  | -1.51711112116095 |
| H | 0.04393311159175  | 1.35560655909610  | -2.64149474746250 |
| H | -1.86964242531662 | 0.98287956576344  | -1.53746542308245 |
| H | 0.00889013072185  | 1.34701557805380  | -0.37209063972648 |

$\text{H}_3\text{CNHPH}_3\text{CH}_3$

$E = -477.589565029473 \text{ au}$

$ZPE = 0.11809318 \text{ au}$

$G_{\text{corr}} = 0.08845913 \text{ au}$

|   |                   |                   |                   |
|---|-------------------|-------------------|-------------------|
| C | -1.33692043658828 | -0.70377604920626 | -0.21664711077460 |
| H | -2.26695781360345 | -1.12855711653188 | 0.15421947408768  |
| H | -1.26877809759539 | -0.79697580424413 | -1.29444766419960 |
| H | -0.52063032255924 | -1.26070249223879 | 0.23813332378792  |
| N | -0.77125888592034 | 1.67026733353119  | -1.23383362195656 |
| H | -1.42087131676226 | 1.36033755686117  | -1.94831698745951 |
| C | -0.64653652636385 | 3.11143920024332  | -1.28107425939424 |
| H | -0.35469482646425 | 3.44372022071715  | -2.27677175032525 |
| H | -1.56175438447491 | 3.66040610150410  | -0.99868164526995 |
| H | 0.14094985300145  | 3.43379633493562  | -0.59701772788808 |
| P | -1.21694888099191 | 1.03344707033823  | 0.40196349385220  |
| H | -1.47169970011175 | 0.52131798026470  | 1.76656903531517  |
| H | -0.05672358984544 | 1.69037580069324  | 0.89533314630554  |
| H | -2.39397004172036 | 1.83621616313234  | 0.52889681391929  |

$\text{CH}_3\text{PH}_2[\text{O}(\text{o}-\text{C}_6\text{H}_4)\text{-O}]$

$E = -762.959589828384 \text{ au}$

$ZPE = 0.14352100 \text{ au}$

$G_{\text{corr}} = 0.10937087 \text{ au}$

|   |                  |                   |                   |
|---|------------------|-------------------|-------------------|
| P | 1.35508432755784 | -0.26674074262201 | -1.06248743259694 |
|---|------------------|-------------------|-------------------|

|   |                   |                   |                   |
|---|-------------------|-------------------|-------------------|
| O | 2.58867986971520  | -0.06562736713724 | 0.16442678434182  |
| O | 2.20812418731985  | 0.93871232042912  | -2.00405666538989 |
| C | 3.36810278378473  | 1.02947940327913  | -0.03761502023112 |
| C | 3.14890103268046  | 1.60795706499517  | -1.28663996798580 |
| C | 3.86427731304019  | 2.71289502214882  | -1.69722535988487 |
| C | 4.81171665313970  | 3.24028328763269  | -0.81927889698745 |
| C | 5.03004993821395  | 2.66422168335313  | 0.42444487195524  |
| C | 4.30818685106579  | 1.54174073746255  | 0.83135980431161  |
| H | 3.68945956239185  | 3.14859771031136  | -2.67060944276783 |
| H | 5.38096747260427  | 4.11022458572922  | -1.11663626660604 |
| H | 5.76861370689562  | 3.08751398358834  | 1.09124544594115  |
| H | 4.47343294830569  | 1.08045483236705  | 1.79457466423608  |
| H | 1.21558759290064  | -1.56020438496638 | -0.48128225962343 |
| C | -0.09714703415030 | 0.60318886940902  | -0.40448462589430 |
| H | -0.23911791552103 | 1.53783076543961  | -0.93823322414907 |
| H | -0.97758584291097 | -0.02222714091490 | -0.53768774133376 |
| H | 0.04166063348635  | 0.80318442317724  | 0.65349997577933  |
| H | 0.88913805948009  | -0.69968904368196 | -2.33762995311470 |

NH<sub>2</sub>PH<sub>2</sub>[O(*o*-C<sub>6</sub>H<sub>4</sub>)O] E = -779.027695787523 au

ZPE = 0.13387517 au

G<sub>corr</sub> = 0.10039772 au

|   |                   |                   |                   |
|---|-------------------|-------------------|-------------------|
| P | 1.36223152132365  | -0.27509960905699 | -0.79418858795433 |
| O | 2.61229047170345  | -0.03191610122988 | 0.30664458318396  |
| O | 1.86516387037324  | 1.24051394137290  | -1.64288946810189 |
| C | 3.42596019663975  | 1.04181743184432  | 0.01352459555519  |
| C | 2.98397953085216  | 1.75502829706980  | -1.09829679258338 |
| C | 3.67920643517185  | 2.87116223677716  | -1.52607255154312 |
| C | 4.82088578671529  | 3.24834135580127  | -0.81903952092336 |
| C | 5.25138919659843  | 2.52993962673106  | 0.28709461139479  |
| C | 4.54817439266134  | 1.40358700274588  | 0.71931569988495  |
| H | 3.34038365017260  | 3.42614592938431  | -2.38937270103401 |
| H | 5.37752155391365  | 4.11718564817286  | -1.14338927019691 |
| H | 6.13914614333885  | 2.83848835486054  | 0.82124554183804  |
| H | 4.86626713938066  | 0.83056257442392  | 1.57869397028340  |
| H | 0.97630275629636  | -1.39412366933751 | -0.00036263685553 |
| H | 1.76335883208660  | -1.01897222824354 | -1.91908708037244 |
| N | -0.20196286761832 | 0.28922891682092  | -0.84934206749786 |
| H | -0.39140561546070 | 1.20937860162983  | -1.20439248713512 |
| H | -0.88852186414891 | -0.09826124976689 | -0.22852368794237 |

H<sub>3</sub>CPH(BH<sub>3</sub>)NHCH<sub>3</sub> E = -503.044067874976 au

ZPE = 0.13144394 au

G<sub>corr</sub> = 0.09966598 au

|   |                   |                   |                   |
|---|-------------------|-------------------|-------------------|
| C | -1.31064882809241 | -0.75352198460543 | -0.12183940665378 |
| H | -1.62656730782795 | -1.31330182950452 | 0.75492667992496  |
| H | -2.00286952553531 | -0.95133600464575 | -0.93720905929720 |
| H | -0.31422944243842 | -1.07920929259610 | -0.40575699124929 |
| N | -0.96365771931950 | 1.76720143871546  | -1.17970562909893 |
| H | -1.63964943995093 | 1.56337462955017  | -1.90117357209421 |
| C | -0.48681584637567 | 3.14574785762473  | -1.21115612800358 |
| H | -0.09156295747456 | 3.36115690067020  | -2.20178215819352 |
| H | -1.25852885907379 | 3.88391230675253  | -0.97434828939083 |
| H | 0.32068879671393  | 3.25804617899330  | -0.49545271201890 |
| P | -1.24307756167721 | 1.01196767301064  | 0.30440480813424  |
| H | -2.59484909539316 | 1.25614996198013  | 0.67531210361197  |
| H | 1.07724009184501  | 1.20041679434344  | 1.25365380567013  |
| H | -0.18451856153964 | 2.63621949855711  | 1.94678867551309  |
| H | -0.36886733171506 | 0.73777833846753  | 2.58857439298284  |
| B | -0.02044963214532 | 1.46832951268654  | 1.68548422016302  |

H<sub>3</sub>CNHPH(CH<sub>3</sub>)Fe(CO)<sub>4</sub> E = -2192.222090578422 au

ZPE = 0.13705289 au

G<sub>corr</sub> = 0.09442059

|    |                   |                   |                   |
|----|-------------------|-------------------|-------------------|
| C  | -1.43644116076069 | -0.65081341383367 | -0.18248279748581 |
| H  | -1.88973453140673 | -1.18914178947414 | 0.64497540416392  |
| H  | -2.08223883933614 | -0.73395439969605 | -1.05460048308584 |
| H  | -0.47094781939707 | -1.09613003195470 | -0.40239963495967 |
| N  | -0.71230355833187 | 1.77917557831565  | -1.16906414852902 |
| H  | -1.31054430883787 | 1.53585512294988  | -1.94568262225087 |
| C  | -0.20406255299201 | 3.14209524165496  | -1.25095250050017 |
| H  | 0.23802791578200  | 3.29141212149332  | -2.23319291058535 |
| H  | -0.96656775956217 | 3.90799981521186  | -1.08744225466309 |
| H  | 0.57726678741718  | 3.27664085885667  | -0.51041296051777 |
| P  | -1.18514215822619 | 1.08681853606785  | 0.29893413328871  |
| H  | -2.52908685972688 | 1.48528277273915  | 0.54148331771719  |
| Fe | 0.14149825165058  | 1.47301304355158  | 2.00887238883404  |
| C  | -0.73878780693733 | 0.23874911372755  | 2.92251975207606  |
| O  | -1.30945464262662 | -0.56535775451252 | 3.52910512549102  |
| C  | 1.49934588510277  | 0.96082488774141  | 0.98915259363546  |
| O  | 2.39303032366695  | 0.62580259526212  | 0.33553548578730  |
| C  | 1.23835812697966  | 1.80663681876101  | 3.35372193100748  |
| O  | 1.95487180171926  | 2.02515314208551  | 4.22865328076813  |
| C  | -0.49322427323013 | 3.12572306250920  | 2.06371392707562  |
| O  | -0.92020778094669 | 4.20097425854333  | 2.10929552273263  |

H<sub>3</sub>CNHPH(CH<sub>3</sub>)Cr(CO)<sub>5</sub> E = -2086.214030412871 au

ZPE = 0.14558114 au

G<sub>corr</sub> = 0.10056399 au

|    |                   |                   |                   |
|----|-------------------|-------------------|-------------------|
| C  | -1.49325765889687 | -0.63501372335564 | -0.28549967351392 |
| H  | -1.87103368904584 | -1.19440433166879 | 0.56611225730217  |
| H  | -2.22496981459206 | -0.68517235764781 | -1.08950418034108 |
| H  | -0.56382490062341 | -1.09029767702449 | -0.61350992136943 |
| N  | -0.80064063782483 | 1.80146277419094  | -1.26572446801966 |
| H  | -1.41853630717336 | 1.49542639013959  | -2.00538165601451 |
| C  | -0.53455790775105 | 3.23223572420166  | -1.34557802238979 |
| H  | -0.20852623075850 | 3.47307628964909  | -2.35467796730632 |
| H  | -1.39766109274404 | 3.85827244595238  | -1.09927381156284 |
| H  | 0.27456371936298  | 3.49481026039895  | -0.67351125940716 |
| P  | -1.17480217586650 | 1.08682966208790  | 0.23386162321312  |
| H  | -2.51376738925772 | 1.48326659212708  | 0.52703882830369  |
| Cr | 0.26962143003511  | 1.43676061371119  | 2.01810049070266  |
| C  | -1.16203709149594 | 0.99495001953475  | 3.14114655755912  |
| O  | -2.04751171905128 | 0.71420702567701  | 3.82558911780339  |
| C  | 0.78081651476728  | -0.36392503394202 | 1.97425519596985  |
| O  | 1.10177657639824  | -1.47183660695144 | 1.95481727998700  |
| C  | 1.36766094564740  | 1.72547613911080  | 3.48464846650915  |
| O  | 2.04779177968610  | 1.90941053722621  | 4.39851943000503  |
| C  | 1.69080530441774  | 1.81964850396032  | 0.85405265298790  |
| O  | 2.58047228981009  | 2.04101522534445  | 0.15562386693258  |
| C  | -0.25705690153456 | 3.23497138146750  | 2.05503371159362  |
| O  | -0.58169891350897 | 4.34152927581034  | 2.09635270105541  |

H<sub>3</sub>CNHPH(CH<sub>3</sub>)Mo(CO)<sub>5</sub> E = -1110.503335344629 au

ZPE = 0.14344476 au

G<sub>corr</sub> = 0.09730156 au

|   |                   |                   |                   |
|---|-------------------|-------------------|-------------------|
| C | -1.47611182134283 | -0.66887433243179 | -0.39976113990358 |
| H | -1.84959172122647 | -1.25349677267515 | 0.43699996338459  |
| H | -2.18483607370130 | -0.74220836663512 | -1.22236936635011 |
| H | -0.51970547400847 | -1.07869883719083 | -0.70969096959546 |
| N | -0.88273026885632 | 1.81955259733115  | -1.33202941263271 |
| H | -1.51718573077965 | 1.55622231299383  | -2.07404214258955 |
| C | -0.57815847950208 | 3.24419757819296  | -1.36146701292484 |
| H | -0.23272343635967 | 3.51045023604232  | -2.35784472760352 |
| H | -1.42606521887466 | 3.88611576567749  | -1.10347164748352 |
| H | 0.22846017806734  | 3.45742850507384  | -0.66867606459228 |
| P | -1.23975542346282 | 1.05805242200375  | 0.14865304590436  |
| H | -2.59882621399887 | 1.38459228155510  | 0.43734307141546  |
| C | -1.27837737081487 | 1.01564053629909  | 3.28805762325284  |
| O | -2.17454053495442 | 0.76166098543033  | 3.96648123988639  |
| C | 0.80477187483728  | -0.51681593845587 | 2.04410031788387  |
| O | 1.09751445650461  | -1.63130701023345 | 2.03266048294051  |
| C | 1.47959224066157  | 1.74186378118228  | 3.65634802211884  |

|    |                   |                  |                  |
|----|-------------------|------------------|------------------|
| O  | 2.16188273032447  | 1.91326901502667 | 4.57016609031094 |
| C  | 1.83830100545854  | 1.83234878062365 | 0.80708363120587 |
| O  | 2.72160018981463  | 2.03488358077055 | 0.09660436586823 |
| C  | -0.24591774786245 | 3.40959366392449 | 2.09866249637368 |
| O  | -0.55264943334533 | 4.52012840138293 | 2.12923353847137 |
| Mo | 0.28867840342178  | 1.44809995411175 | 2.06944980465862 |

CH<sub>3</sub>NHP(BH<sub>3</sub>)CH<sub>3</sub> E = -503.044067874976 au

ZPE = 0.13144394 au

G<sub>corr</sub> = 0.09966598 au

|   |                   |                   |                   |
|---|-------------------|-------------------|-------------------|
| C | -1.31064882809241 | -0.75352198460543 | -0.12183940665378 |
| H | -1.62656730782795 | -1.31330182950452 | 0.75492667992496  |
| H | -2.00286952553531 | -0.95133600464575 | -0.93720905929720 |
| H | -0.31422944243842 | -1.07920929259610 | -0.40575699124929 |
| N | -0.96365771931950 | 1.76720143871546  | -1.17970562909893 |
| H | -1.63964943995093 | 1.56337462955017  | -1.90117357209421 |
| C | -0.48681584637567 | 3.14574785762473  | -1.21115612800358 |
| H | -0.09156295747456 | 3.36115690067020  | -2.20178215819352 |
| H | -1.25852885907379 | 3.88391230675253  | -0.97434828939083 |
| H | 0.32068879671393  | 3.25804617899330  | -0.49545271201890 |
| P | -1.24307756167721 | 1.01196767301064  | 0.30440480813424  |
| H | -2.59484909539316 | 1.25614996198013  | 0.67531210361197  |
| H | 1.07724009184501  | 1.20041679434344  | 1.25365380567013  |
| H | -0.18451856153964 | 2.63621949855711  | 1.94678867551309  |
| H | -0.36886733171506 | 0.73777833846753  | 2.58857439298284  |
| B | -0.02044963214532 | 1.46832951268654  | 1.68548422016302  |

CH<sub>3</sub>NHPH(O)CH<sub>3</sub> E = -551.629909096137 au

ZPE = 0.10522781 au

G<sub>corr</sub> = 0.07445607 au

|   |                   |                   |                   |
|---|-------------------|-------------------|-------------------|
| C | -1.32824465206779 | -0.73841354526788 | -0.11105403645954 |
| H | -1.63563263289116 | -1.29612251195001 | 0.76984545695497  |
| H | -2.05942817126770 | -0.90155298506320 | -0.90159571806864 |
| H | -0.35558564815976 | -1.09740341431134 | -0.43618558319394 |
| N | -0.84878022149506 | 1.74684175950690  | -1.14814529489054 |
| H | -1.39058809816796 | 1.42015468136353  | -1.93495010531806 |
| C | -0.57691093614276 | 3.17901638653240  | -1.17014104113808 |
| H | -0.03735568787158 | 3.43414396318834  | -2.07996050240013 |
| H | -1.47811929509539 | 3.79758680799424  | -1.11264048794299 |
| H | 0.06032271920257  | 3.42183512008389  | -0.32532461977506 |
| P | -1.19312699325885 | 1.01578801381959  | 0.33025125388257  |
| H | -2.53434486715573 | 1.35952908786935  | 0.67503099413142  |
| O | -0.22974263562882 | 1.37852864623417  | 1.40905670421802  |



|                          |                                                                |                   |                   |
|--------------------------|----------------------------------------------------------------|-------------------|-------------------|
| Cl <sup>-</sup>          | E = -460.245974231702 au (PWPB95-D3/def2-QZVPP)                |                   |                   |
| Cl                       | 0.00000000000000                                               | 0.00000000000000  | 0.00000000000000  |
| <b>1a·Cl<sup>-</sup></b> | E = -896.786260686427 au (PWPB95-D3/def2-QZVPP)                |                   |                   |
|                          | ZPE = 0.05216749 au (RIJCOSX-B3LYP-D4/def2-TZVP)               |                   |                   |
|                          | G <sub>corr</sub> = 0.02244421 au (RIJCOSX-B3LYP-D4/def2-TZVP) |                   |                   |
| C                        | -0.04742246102130                                              | 0.00539347451449  | -0.00050517495067 |
| N                        | -0.06444775165922                                              | 0.04613880847950  | 1.47016989224658  |
| P                        | 1.63007105517793                                               | -0.10858791442641 | 0.66347146355313  |
| H                        | -0.36047051249507                                              | 0.92701539929004  | -0.48327451556798 |
| H                        | -0.42852637560642                                              | -0.88022409094449 | -0.50734054760691 |
| H                        | -0.31516933067347                                              | -0.87387265548714 | 1.82470000450982  |
| H                        | 1.88113340358628                                               | 1.27580002166357  | 0.78305078746725  |
| Cl                       | 3.32862741269125                                               | 0.32008687691045  | -1.47016104965123 |
| MeOH                     | E = -115.705093802237 au (PWPB95-D3/def2-QZVPP)                |                   |                   |
|                          | ZPE = 0.05097303 au (RIJCOSX-B3LYP-D4/def2-TZVP)               |                   |                   |
|                          | G <sub>corr</sub> = 0.02818780 au (RIJCOSX-B3LYP-D4/def2-TZVP) |                   |                   |
| O                        | 3.42005820706976                                               | 0.70829159176762  | -1.53064250698150 |
| H                        | 4.29299142540571                                               | 0.37649794920285  | -1.29795292685576 |
| C                        | 2.87993686643162                                               | -0.10883812859079 | -2.55999919534789 |
| H                        | 1.89679543161075                                               | 0.29464559274215  | -2.79955479744597 |
| H                        | 3.49190320663572                                               | -0.08839483088110 | -3.46907836153437 |
| H                        | 2.75674933284643                                               | -1.15003454424074 | -2.24043763183452 |
| <b>1a·MeOH</b>           | E = -552.231420300403 au (PWPB95-D3/def2-QZVPP)                |                   |                   |
|                          | ZPE = 0.10396199 au (RIJCOSX-B3LYP-D4/def2-TZVP)               |                   |                   |
|                          | G <sub>corr</sub> = 0.07035690 au (RIJCOSX-B3LYP-D4/def2-TZVP) |                   |                   |
| C                        | 0.06211460293424                                               | -0.28015026333854 | 0.04928518146833  |
| N                        | -0.02070546873250                                              | 0.08774405786596  | 1.46014916008983  |
| P                        | 1.64935896902711                                               | 0.16954571822851  | 0.83705254223218  |
| H                        | -0.41664992506893                                              | 0.42026510211890  | -0.62528210332291 |
| H                        | -0.06335727092611                                              | -1.32297811749762 | -0.22703684027375 |
| H                        | -0.13264894524502                                              | -0.72666188289241 | 2.05616812605675  |
| H                        | 1.63974738506643                                               | 1.55785000723576  | 0.54689049861134  |
| O                        | 3.60025043459682                                               | 0.55809705770563  | -1.47880739225075 |
| H                        | 4.01962833550790                                               | -0.20780734303008 | -1.07276596187762 |
| C                        | 2.89346104506214                                               | 0.13385657091380  | -2.63817830174775 |
| H                        | 2.41521855010729                                               | 1.01852600928674  | -3.05628264713933 |
| H                        | 3.56456086845704                                               | -0.28855149995954 | -3.39350324089961 |
| H                        | 2.11703002921352                                               | -0.59995137663710 | -2.39791653094668 |
| MeNH <sub>2</sub>        | E = -95.830635920835 au (PWPB95-D3/def2-QZVPP)                 |                   |                   |

ZPE = 0.06369288 au (RIJCOSX-B3LYP-D4/def2-TZVP)

G<sub>corr</sub> = 0.04075224 au (RIJCOSX-B3LYP-D4/def2-TZVP)

|   |                  |                   |                   |
|---|------------------|-------------------|-------------------|
| N | 2.85398337461213 | 0.18990779577050  | -1.14451470046720 |
| H | 2.90840056329581 | 1.10758881018167  | -1.57022436571458 |
| H | 3.77105920328024 | -0.01403951260016 | -0.76541208274485 |
| C | 2.46390013572353 | -0.81776118389355 | -2.13056465003198 |
| H | 1.46865051254159 | -0.58144111447536 | -2.51157948576524 |
| H | 3.13992368243117 | -0.91619016110401 | -2.99173961650923 |
| H | 2.39933674811552 | -1.79208125387910 | -1.64263723876691 |

**1a**·MeNH<sub>2</sub>

E = -532.357781263142 au (PWPB95-D3/def2-QZVPP)

ZPE = 0.11696332 au (RIJCOSX-B3LYP-D4/def2-TZVP)

G<sub>corr</sub> = 0.08371225 au (RIJCOSX-B3LYP-D4/def2-TZVP)

|   |                   |                   |                   |
|---|-------------------|-------------------|-------------------|
| C | -0.25299133114436 | -0.08856205357460 | 0.16581320957158  |
| N | -0.27185067007517 | 0.13260957818435  | 1.61279893379940  |
| P | 1.38492537395194  | -0.06964709334408 | 0.96323495593354  |
| H | -0.57700581349437 | 0.76342982121128  | -0.42157595552202 |
| H | -0.59236848865751 | -1.04556949836576 | -0.22034505026397 |
| H | -0.55879783940574 | -0.70244540605871 | 2.11399781654850  |
| H | 1.66065885585911  | 1.31653040116999  | 0.84233059349888  |
| N | 3.22861102286155  | 0.18247098103506  | -1.34664367654685 |
| H | 3.37714961049852  | 1.09507231155452  | -1.76019410916894 |
| H | 4.12775912178418  | -0.15276242573065 | -1.02260288097085 |
| C | 2.63701053472293  | -0.74544183063844 | -2.31035054807542 |
| H | 1.66834717901739  | -0.35905757318471 | -2.63036434116826 |
| H | 3.24554592398543  | -0.92747063334857 | -3.20543168507198 |
| H | 2.45704280009610  | -1.70259232890966 | -1.81879975256360 |

NHC<sup>Me2</sup>

E = -304.717435647324 au (PWPB95-D3/def2-QZVPP)

ZPE = 0.12621482 au (RIJCOSX-B3LYP-D4/def2-TZVP)

G<sub>corr</sub> = 0.09541650 au (RIJCOSX-B3LYP-D4/def2-TZVP)

|   |                  |                   |                   |
|---|------------------|-------------------|-------------------|
| C | 3.25058276064910 | 0.38361824223080  | -1.05185995327593 |
| N | 3.97471297756839 | -0.69912030650608 | -1.45039821413048 |
| C | 4.04695983382006 | -0.81916796933514 | -2.82927351983870 |
| C | 3.34619616629389 | 0.22075336636520  | -3.33317581915384 |
| N | 2.87544827500106 | 0.93227915484514  | -2.24085943822340 |
| C | 4.59666778748512 | -1.61988278054794 | -0.52042777481889 |
| H | 4.20392008314739 | -2.63013587679257 | -0.65360609744763 |
| H | 5.67958508798795 | -1.63998787988883 | -0.65982702816466 |
| H | 4.36981314331929 | -1.27569701743176 | 0.48483132792276  |
| C | 2.06958425721058 | 2.13245773259343  | -2.33849999632690 |
| H | 1.13191116481111 | 1.92894800385188  | -2.86000344065865 |
| H | 1.85351061951162 | 2.46698178523050  | -1.32761026571401 |
| H | 2.60768255788415 | 2.91876968809576  | -2.87212363762556 |

|   |                  |                   |                   |
|---|------------------|-------------------|-------------------|
| H | 4.57653062189765 | -1.61317635116961 | -3.32685372545426 |
| H | 3.15004534821973 | 0.50419509466991  | -4.35282107422634 |

**1a·NHC<sup>Me2</sup>**

E = -741.247584229193 au (PWPB95-D3/def2-QZVPP)

ZPE = 0.17926291 au (RIJCOSX-B3LYP-D4/def2-TZVP)

G<sub>corr</sub> = 0.14077525 au (RIJCOSX-B3LYP-D4/def2-TZVP)

|   |                   |                   |                   |
|---|-------------------|-------------------|-------------------|
| C | -0.14517456926552 | -0.09548256416776 | -0.12127707480012 |
| N | -0.41206699304811 | -0.10089800662795 | 1.32034308174792  |
| P | 1.34644160952901  | -0.09881862823051 | 0.91627529659376  |
| H | -0.45241638280852 | 0.81307170802371  | -0.62901048267460 |
| H | -0.34110645985941 | -0.99864214093583 | -0.69362720013318 |
| H | -0.70175419518688 | -1.02101331354656 | 1.63773457990259  |
| H | 1.51705999583227  | 1.29935867927421  | 1.05837670650015  |
| C | 3.26880045959214  | 0.39082505919942  | -1.05972759349477 |
| N | 3.97955691264553  | -0.69901779517990 | -1.45137813017618 |
| C | 4.03682643980065  | -0.82588566550096 | -2.82910219967042 |
| C | 3.33994240443302  | 0.21710713399544  | -3.33318132185869 |
| N | 2.88649059544741  | 0.94081858094034  | -2.24255931576549 |
| C | 4.59687901530595  | -1.62073165257087 | -0.51793171507786 |
| H | 4.27366692473131  | -2.64295853192052 | -0.72168818274375 |
| H | 5.68535695277620  | -1.57069882024437 | -0.58563606525486 |
| H | 4.28310661752323  | -1.34132135110938 | 0.48356549735576  |
| C | 2.07620144918092  | 2.13873493136739  | -2.33779067784743 |
| H | 1.11519438892810  | 1.91974399243170  | -2.80703223386452 |
| H | 1.90633565739970  | 2.50789216030650  | -1.33054553197731 |
| H | 2.58986253856203  | 2.90501113955674  | -2.92121127746072 |
| H | 4.55803563643267  | -1.62558447942469 | -3.32600594364767 |
| H | 3.13689469204824  | 0.49690018436384  | -4.35228396565259 |

**PMe<sub>3</sub>**

E = -461.019742945137 au (PWPB95-D3/def2-QZVPP)

ZPE = 0.11211235 au (RIJCOSX-B3LYP-D4/def2-TZVP)

G<sub>corr</sub> = 0.08285788 au (RIJCOSX-B3LYP-D4/def2-TZVP)

|   |                   |                  |                   |
|---|-------------------|------------------|-------------------|
| P | 1.28344255897223  | 2.35678218686099 | -1.10000505643911 |
| C | 0.01047396988936  | 3.57852663955078 | -1.65997879598774 |
| H | -0.17228725370579 | 3.45093929827315 | -2.72839137860924 |
| H | -0.92946860569870 | 3.39107433759241 | -1.13789910036096 |
| H | 0.31614258334457  | 4.61220137640891 | -1.47557021059140 |
| C | 2.77492833221830  | 3.07574079281376 | -1.92777254793939 |
| H | 3.67010063602304  | 2.55567125309731 | -1.58218881891374 |
| H | 2.70073012546024  | 2.92742648296167 | -3.00649859179568 |
| H | 2.88807764570468  | 4.14453803872471 | -1.72575298449139 |
| C | 1.56413766399037  | 2.98192406881363 | 0.61963087939705  |
| H | 0.68524095131773  | 2.77268207624197 | 1.23196067922259  |
| H | 2.41119933968315  | 2.45713958258269 | 1.06493071226004  |

|                           |                                                                |                   |                   |
|---------------------------|----------------------------------------------------------------|-------------------|-------------------|
| H                         | 1.76300190280079                                               | 4.05701368607798  | 0.64408236424898  |
| <b>1a-PMe<sub>3</sub></b> |                                                                |                   |                   |
|                           | E = -897.547610442017 au (PWPB95-D3/def2-QZVPP)                |                   |                   |
|                           | ZPE = 0.16491036 au (RIJCOSX-B3LYP-D4/def2-TZVP)               |                   |                   |
|                           | G <sub>corr</sub> = 0.12725679 au (RIJCOSX-B3LYP-D4/def2-TZVP) |                   |                   |
| C                         | 0.45527621034238                                               | -0.55511351515692 | -0.10012243291128 |
| N                         | -0.03199721506826                                              | -0.09439302052122 | 1.19882587113687  |
| P                         | 1.53229153778183                                               | 0.64774447496810  | 0.74788845593032  |
| H                         | -0.14335400504412                                              | -0.23292811697622 | -0.94453780683538 |
| H                         | 0.83492712993887                                               | -1.56922531882569 | -0.18646333299089 |
| H                         | 0.10486156786664                                               | -0.79425877850171 | 1.92178008755460  |
| H                         | 0.98760990554621                                               | 1.83950012220087  | 0.20495351589361  |
| P                         | 3.86791855959354                                               | 1.19859400727044  | -1.51153301217060 |
| C                         | 3.80583835630526                                               | -0.53603294719090 | -2.14425299369126 |
| H                         | 3.50536512205131                                               | -1.20313456645389 | -1.33547815538457 |
| H                         | 3.05662148431906                                               | -0.61015343930685 | -2.93421885839286 |
| H                         | 4.76983934995713                                               | -0.86768127692911 | -2.53884895164424 |
| C                         | 4.64811256448061                                               | 2.03697368514674  | -2.96494245898802 |
| H                         | 3.94061995006308                                               | 2.06001653804786  | -3.79552664676335 |
| H                         | 4.88879456208980                                               | 3.06890127950687  | -2.70413920596460 |
| H                         | 5.56157921477808                                               | 1.53359211754289  | -3.29326150985853 |
| C                         | 5.33101923137880                                               | 1.07504607528096  | -0.39156333119299 |
| H                         | 5.60728159411937                                               | 2.07129439534412  | -0.04186289962452 |
| H                         | 5.06497708338963                                               | 0.47751371248475  | 0.48137649191908  |
| H                         | 6.19503047611061                                               | 0.62229195206889  | -0.88522139602132 |
| <b>2a</b>                 |                                                                |                   |                   |
|                           | E = -419.177095591712 au [B97-3c]                              |                   |                   |
|                           | ZPE = 0.03777636 au                                            |                   |                   |
|                           | G <sub>corr</sub> = 0.01262503 au                              |                   |                   |
| P                         | 1.11402852137814                                               | 0.13490485590304  | -0.06829584942243 |
| H                         | 1.52995663521492                                               | -1.24218676787874 | -0.16821523932102 |
| C                         | -0.67178958410455                                              | -0.04612082574472 | -0.50094978536230 |
| H                         | -1.38720859958685                                              | -0.06505047720365 | -1.30524389251618 |
| C                         | -0.51106900264964                                              | -0.09058217963020 | 0.77846620281237  |
| H                         | -1.00562956025203                                              | -0.17031789544572 | 1.73142496380957  |
| <b>2b</b>                 |                                                                |                   |                   |
|                           | E = -435.232321775046 au [B97-3c]                              |                   |                   |
|                           | ZPE = 0.02682316 au                                            |                   |                   |
|                           | G <sub>corr</sub> = 0.00177926 au                              |                   |                   |
| P                         | 1.12127808253353                                               | 0.14186791072493  | -0.03113975548909 |
| N                         | -0.59093617831063                                              | -0.20899297088975 | 0.70975028128918  |
| H                         | 1.52579612215874                                               | -1.21949161317531 | -0.23354186361542 |
| C                         | -0.60147713914128                                              | -0.05681988971328 | -0.52668680265038 |
| H                         | -1.36492509724036                                              | -0.05866321694659 | -1.29703389953429 |

**3** E = -116.560864972907 au [B97-3c]  
 ZPE = 0.05509883 au  
 G<sub>corr</sub> = 0.03115746 au

|   |                   |                   |                   |
|---|-------------------|-------------------|-------------------|
| C | -0.61380222368123 | 0.10647851721218  | -0.49138662482348 |
| H | -1.12265515370099 | 0.53360618388373  | -1.33719052386684 |
| C | -0.43703436504509 | 0.03559586399161  | 0.78199901240868  |
| H | -0.69058828919387 | 0.36036361848981  | 1.77547112734744  |
| C | 0.42575419657953  | -0.86661909970679 | -0.03892703746271 |
| H | 0.21782578605493  | -1.93537029241451 | -0.06953694743615 |
| H | 1.48131267898673  | -0.63344965145603 | -0.17247441616694 |

**4** E = -115.672376105543 au [B97-3c]  
 ZPE = 0.04469754au  
 G<sub>corr</sub> = 0.02107458 au

|   |                   |                   |                   |
|---|-------------------|-------------------|-------------------|
| C | -0.57960799141514 | 0.07637576252931  | -0.53174183047480 |
| H | -1.10089185844321 | 0.49043751501522  | -1.38174538282460 |
| C | -0.39363539358906 | 0.00182886004123  | 0.80801022691743  |
| H | -0.65818651948833 | 0.31292256247144  | 1.80747047202781  |
| C | 0.36724491975476  | -0.74887552063737 | -0.02423743199313 |
| H | 1.15303388318097  | -1.47407767941982 | -0.17368938365272 |

**4'** E = -115.863493618381 au [B97-3c]  
 ZPE = 0.03718688au  
 G<sub>corr</sub> = 0.01309423 au

|   |                   |                   |                   |
|---|-------------------|-------------------|-------------------|
| C | 0.03799089225278  | -0.47545492928618 | -0.19321905897564 |
| H | 0.21011789943305  | 0.37988612912060  | 0.50385450865935  |
| C | 0.49028974789499  | -0.19892374606297 | -1.46302127655766 |
| H | 1.32525195958578  | 0.34096193699137  | -1.93407945621858 |
| C | -0.83856316836099 | -0.44995743870579 | -1.71711028829752 |
| H | -1.34226677080560 | 0.42498364794296  | -2.19448838860994 |

**TS(1a→5)** E = -531.703568309930 au  
 ZPE = 0.11471536 au  
 G<sub>corr</sub> = 0.08187042 au  
 $\bar{\nu} = -491.02 \text{ cm}^{-1}$

|   |                   |                   |                   |
|---|-------------------|-------------------|-------------------|
| P | -1.68456671820849 | 2.99230470376262  | 0.79621971369114  |
| H | -0.45827908847321 | 3.69348345018574  | 1.09076916647332  |
| N | -1.06483685175629 | 1.99020459839082  | -0.53758220359972 |
| H | -0.91955709623808 | 0.97990638051383  | -0.39784337714440 |
| N | -0.99581806436198 | -0.81047724899600 | 0.31764349867896  |
| H | -0.40487328015218 | -0.73965721580750 | 1.13663171751965  |
| H | -0.66754719014464 | -1.61339942480680 | -0.20329884588068 |

|   |                   |                   |                   |
|---|-------------------|-------------------|-------------------|
| C | -2.39059351549833 | -0.99788037957076 | 0.72540338131640  |
| H | -2.71961227553202 | -0.11317483818800 | 1.26596432028382  |
| H | -3.01468314858872 | -1.08909768079524 | -0.16141649585665 |
| H | -2.56711541747900 | -1.87483187584373 | 1.35615393001489  |
| C | -1.92834299796764 | 2.40310034850632  | -1.47464979708991 |
| H | -2.59698559997948 | 1.71171547696617  | -1.98545108919866 |
| H | -1.87942073561912 | 3.41638937568218  | -1.83425010920821 |

5  
E = -531.703568309930 au  
ZPE = 0.11709536 au  
G<sub>corr</sub> = 0.08635859 au

|   |                   |                   |                   |
|---|-------------------|-------------------|-------------------|
| N | -0.95598072281666 | 2.17131054452182  | -0.17641771546483 |
| H | -0.07366047489905 | 1.83362102184515  | 0.17722695910235  |
| N | -2.57677013430687 | 0.42240508827749  | 0.59529001638037  |
| H | -3.01678003910356 | 0.25089925294614  | -0.29982299478596 |
| C | -1.58057347472659 | -0.59202384534555 | 0.88108891139506  |
| H | -2.03848873905372 | -1.57758764749516 | 0.82813251209432  |
| H | -0.71155028233930 | -0.58893817848204 | 0.20808322617450  |
| H | -1.21105985925249 | -0.45910735548574 | 1.89864627331152  |
| C | -2.09450647904975 | 1.78433508230293  | 0.65760393177245  |
| H | -1.81459037227976 | 1.99849131824755  | 1.68996444833531  |
| H | -2.92697616334478 | 2.43638276745449  | 0.39924604507834  |
| P | -1.19347480540083 | 2.12765821189853  | -1.87883568549380 |
| H | -0.07107347490947 | 2.90618306509064  | -2.26644412652310 |
| H | -0.56648443851706 | 0.90187955422363  | -2.28498217137658 |

TS(1a→W-5) E = -1164.464532031608 au  
ZPE = 0.15931819 au  
G<sub>corr</sub> = 0.11019576 au  
 $\bar{\nu} = -388.36 \text{ cm}^{-1}$

|   |                   |                   |                   |
|---|-------------------|-------------------|-------------------|
| N | -1.03432024563267 | 2.62539451488865  | 0.01085521091803  |
| H | -0.67378531053069 | 2.68830726669880  | 0.95488288052700  |
| N | -0.99895226222798 | -0.03308334251400 | 0.07160181813773  |
| H | -0.63720691637608 | -0.06375230928465 | 1.01669038291305  |
| H | -0.22070916262871 | 0.14609282266527  | -0.55061741887942 |
| C | -1.73596742160669 | -1.24789794394798 | -0.27191722302258 |
| H | -2.59083820796376 | -1.34608532460047 | 0.39160777843674  |
| H | -2.10383652200475 | -1.16504706495607 | -1.29077558265847 |
| H | -1.12654423188776 | -2.14806599343033 | -0.19259932690163 |
| C | -2.02964352068081 | 1.66337612177294  | -0.09329712156730 |
| H | -2.70451953748787 | 1.42640112375632  | 0.72439865432969  |
| H | -2.39986620048741 | 1.45596703218404  | -1.08425066511617 |
| P | -2.28594997970043 | 3.93993039705385  | -0.22941366043937 |
| H | -1.69918762475453 | 4.47727828782574  | -1.40695078412989 |
| W | -2.12431357876586 | 5.49160328886896  | 1.79947146754958  |

|   |                   |                  |                   |
|---|-------------------|------------------|-------------------|
| C | -4.15896049231203 | 5.45376978390646 | 1.98699223803749  |
| O | -5.30712144423167 | 5.42839309385423 | 2.09987360491159  |
| C | -2.00128942628994 | 3.82078108454616 | 2.93353242302413  |
| O | -1.92402237067452 | 2.81709910201050 | 3.51470524776921  |
| C | -1.96375294683394 | 6.70201904428463 | 3.38256154480453  |
| O | -1.85085382018479 | 7.40258508197230 | 4.29860368339306  |
| C | -0.10232385231999 | 5.50019933336785 | 1.55308624923824  |
| O | 1.04438857821544  | 5.49158349619746 | 1.40949723536284  |
| C | -2.27707501540373 | 7.06996702169028 | 0.50452824472766  |
| O | -2.36495532722733 | 7.93947919118611 | -0.24794233136652 |

**W-5**

E = -1164.547142554756 au

ZPE = 0.15928748 au

G<sub>corr</sub> = 0.11154844 au

|   |                   |                   |                   |
|---|-------------------|-------------------|-------------------|
| N | -1.70503429372746 | 2.32755342423750  | 0.55314776607500  |
| H | -1.35932578962888 | 2.23396616695614  | 1.49611227284876  |
| N | -0.99490776141283 | 0.13069517056266  | -0.04748393756118 |
| H | -0.79481937680590 | -0.12894858225105 | 0.91148944613843  |
| C | -1.28366220311564 | -1.07207662181401 | -0.81347242074096 |
| H | -2.21132835629868 | -1.58712379093933 | -0.52312133131442 |
| H | -1.36078374213181 | -0.82027310561169 | -1.87049749670523 |
| H | -0.45890129430483 | -1.77199428496264 | -0.70397808561443 |
| C | -2.09062296799492 | 1.07080044888230  | -0.06914285980729 |
| H | -3.01140017159208 | 0.66777200820151  | 0.39563212046097  |
| H | -2.33381459660852 | 1.28008859599055  | -1.11202194816370 |
| W | -2.10121684109125 | 5.60822020124752  | 1.85712535949257  |
| C | -4.09677684619964 | 5.95857748555829  | 2.10364829994176  |
| O | -5.22658054626009 | 6.14371644229492  | 2.23874978138679  |
| C | -2.14437294805241 | 4.30261497131135  | 3.41927041184514  |
| O | -2.16711970123239 | 3.54541084225703  | 4.29145913446969  |
| C | -1.65673931986998 | 7.12786741349583  | 3.09936672463638  |
| O | -1.40051062905968 | 7.99828300120542  | 3.81269664867952  |
| C | -0.11073568611035 | 5.22614484178728  | 1.58267732948667  |
| O | 1.01175969381314  | 5.01480824856694  | 1.43399398476603  |
| C | -2.06679433733624 | 6.87311935431595  | 0.25041699412352  |
| O | -2.04965223277235 | 7.57392391722134  | -0.66383978260791 |
| P | -2.63946659465662 | 3.71864359196555  | 0.34180974123779  |
| H | -2.52811672883387 | 3.90315715970532  | -1.05474092611725 |
| H | -3.99448943871671 | 3.27961493981523  | 0.33237507304333  |

**W-6**

E = -1164.506566400411 au

ZPE = 0.16196131 au

G<sub>corr</sub> = 0.11457516 au

|   |                   |                  |                  |
|---|-------------------|------------------|------------------|
| N | -0.11502812496318 | 2.05896922174988 | 0.82240065414508 |
|---|-------------------|------------------|------------------|

|   |                   |                   |                   |
|---|-------------------|-------------------|-------------------|
| H | 0.31243124267904  | 2.26365100352132  | 1.71545179773828  |
| N | -1.59441393556061 | 0.76149350112880  | -0.41062141094957 |
| H | -0.87196495980561 | 0.21342833736538  | -0.86866939943357 |
| H | -1.53798031299079 | 1.77547799180972  | -0.84174700746201 |
| C | -2.93753756023218 | 0.17412778527657  | -0.55333869058950 |
| H | -3.01470829014434 | -0.74043393302352 | 0.02714933007010  |
| H | -3.66705113750088 | 0.89461744169080  | -0.19899724824594 |
| H | -3.12154737898750 | -0.03966618529005 | -1.60134827724344 |
| C | -1.15087876678316 | 1.08499594976741  | 0.98778982246811  |
| H | -0.79137874269610 | 0.18108466525424  | 1.47633470275182  |
| H | -2.05555276840962 | 1.42988426996578  | 1.50332921304200  |
| P | -0.79501079118208 | 3.49394468138963  | -0.02900766850597 |
| H | 0.44820152302816  | 4.00706264045871  | -0.46886416185128 |
| W | -2.03548415849040 | 5.06048667089784  | 1.58173230371126  |
| C | -3.64447966279364 | 3.89777128002340  | 1.19988078712494  |
| O | -4.51046477614611 | 3.16669754407169  | 0.93882533391550  |
| C | -1.54195397265979 | 3.84681828628239  | 3.12436264524060  |
| O | -1.23150962344642 | 3.10612425374982  | 3.96220949192805  |
| C | -3.03735594783749 | 6.29558333796977  | 2.80309769344236  |
| O | -3.60677452071514 | 7.01229327598995  | 3.51313388345278  |
| C | -0.25709670193054 | 6.04257434118979  | 1.80243814535782  |
| O | 0.77625756576541  | 6.54841864477442  | 1.89571196881318  |
| C | -2.48545022610589 | 6.22655330721157  | -0.04018047523884 |
| O | -2.73983800457375 | 6.87422823937556  | -0.96090306216883 |

**7** E = -492.485501999802 au  
ZPE = 0.09076137 au  
G<sub>corr</sub> = 0.06197777 au

|   |                   |                   |                   |
|---|-------------------|-------------------|-------------------|
| C | -0.75414833415319 | 0.84892768885077  | -0.47620272611328 |
| H | -0.23201464163362 | 1.35018082816167  | -1.29289809984491 |
| H | -1.82500932456837 | 0.87439408431913  | -0.71705829879275 |
| P | -0.51134165253773 | 1.92915906196232  | 1.01939579678637  |
| H | 0.91227535473111  | 1.82499543326872  | 1.00757013397999  |
| N | -0.20594148473297 | -0.48921304483146 | -0.29667732826430 |
| H | -0.77746988038931 | -0.98113329134639 | 0.37880817300922  |
| H | -0.27074736121741 | -1.01218870492201 | -1.16173199177188 |
| N | -0.90788558798496 | 0.79255077336079  | 2.26290938525539  |
| H | -0.19276845862412 | 0.12518446412691  | 2.50907043178261  |
| H | -1.28130867888943 | 1.22128026704954  | 3.09323546397355  |

**TS(7→8+9)** E = -588.097754110000 au  
ZPE = 0.15222256 au  
G<sub>corr</sub> = 0.11019576 au  
 $\bar{v}$  = -124.38 cm<sup>-1</sup>



|   |                   |                   |                   |
|---|-------------------|-------------------|-------------------|
| P | -1.68133057505053 | 1.20226035912283  | 1.83435031858612  |
| H | -2.35793324140537 | 0.42243798557482  | 2.83671782071158  |
| N | 0.44962938871634  | 1.42168734693520  | -0.17680286625483 |
| H | 0.59012891137692  | 1.17295386474093  | 0.84318972112148  |
| H | 0.02697090669900  | 0.69756883580174  | -0.80274146102837 |
| N | 0.02082977879179  | 0.97125233885151  | 2.45657800713216  |
| H | 0.22256756783324  | 1.55673537940726  | 3.25720737509428  |
| H | 0.19491760901127  | 0.01586511037186  | 2.74336386126294  |
| C | 0.45602284421595  | 2.67173618479813  | -0.49007474266407 |
| H | 0.14782452557836  | 2.99451849009365  | -1.47429066612662 |
| H | 0.73839591427025  | 3.40495905168700  | 0.25128182296625  |
| C | -0.83542926893004 | -1.94644252173237 | -1.10634785652313 |
| H | -0.21143927209135 | -2.27321598980369 | -1.93670484596054 |
| H | -0.24742099822799 | -2.03894333388954 | -0.19455955591599 |
| H | -1.68216045653263 | -2.63503649999004 | -1.02379334677585 |
| N | -1.21400510469379 | -0.54612810857298 | -1.28326050040225 |
| H | -1.82324209445639 | -0.44008368206728 | -2.08469299259059 |
| H | -1.72868591510481 | -0.22103459132921 | -0.45922145263258 |

**W-7**

E = -1125.340390765710 au

ZPE = 0.13322074 au

G<sub>corr</sub> = 0.08662072 au

|   |                   |                   |                   |
|---|-------------------|-------------------|-------------------|
| C | -0.63010302151916 | 0.71557495731923  | -0.47533133567022 |
| H | -0.00771745606040 | 1.12718546734874  | -1.26899852430468 |
| H | -1.67261379310040 | 0.91043004504148  | -0.74812106241053 |
| P | -0.26818770849998 | 1.72215773808414  | 1.02825143527335  |
| H | 1.13594537521023  | 1.52639809920217  | 1.08036993676848  |
| N | -0.29612745904549 | -0.67987716730477 | -0.24958917672433 |
| H | -1.06354496353370 | -1.14445589563506 | 0.21520979456094  |
| H | -0.13979313251384 | -1.15977108010901 | -1.12486279584616 |
| N | -0.89205346852223 | 0.72533162037963  | 2.25982615814439  |
| H | -0.34267666646683 | -0.09407057347182 | 2.47333770027476  |
| H | -1.14467404605886 | 1.22030421415435  | 3.09936254090173  |
| W | -1.09619778871992 | 4.06523707575153  | 1.05297305381499  |
| C | 0.82817785527783  | 4.71345652117634  | 0.84376479298064  |
| O | 1.92271763098703  | 5.05525837546198  | 0.72343053338029  |
| C | -0.88004961475552 | 4.08784745323704  | 3.07931143872128  |
| O | -0.75769120458298 | 4.08113219968327  | 4.22765397417883  |
| C | -2.99027917564824 | 3.32827861002366  | 1.24638318147962  |
| O | -4.05754996142993 | 2.90317403375568  | 1.34824498275160  |
| C | -1.78578668488932 | 5.95848021184867  | 1.08565667575211  |
| O | -2.18411932886260 | 7.04176185706902  | 1.10937697303651  |
| C | -1.29794036049900 | 4.01920889452051  | -0.97801964788079 |
| O | -1.41057701676663 | 3.99280992246315  | -2.12614153918283 |

**TS(W-7→8+W-9)**

E = -1220.963961711267 au

ZPE = 0.19679245 au

 $G_{\text{corr}} = 0.14572650$  au $\bar{\nu} = -339.17$   $\text{cm}^{-1}$ 

|   |                   |                   |                   |
|---|-------------------|-------------------|-------------------|
| P | 0.67795034860762  | 2.41723049682439  | 2.53247537973489  |
| H | 1.23105720725150  | 2.91196304981977  | 3.75452713905380  |
| N | 0.20669701305166  | -0.27797911712800 | 0.80873779928488  |
| H | -0.39448274931735 | -0.03533537222980 | 1.62078869713456  |
| H | 0.78606992852132  | -1.09280665732631 | 0.92999596998243  |
| N | -0.34063204461055 | 1.08803652970363  | 3.17062932295365  |
| H | 0.14699117114027  | 0.56456299276737  | 3.88791161951715  |
| H | -1.20678945559677 | 1.41647060204842  | 3.57628734430013  |
| W | -0.95704727802297 | 4.23063019031936  | 1.68218526403613  |
| C | 0.52479683174465  | 5.56936534496556  | 2.13418231054337  |
| O | 1.38192686992368  | 6.30056076864995  | 2.38345179807177  |
| C | -1.59357372821305 | 4.24850895638547  | 3.62478820073883  |
| O | -1.93612835623164 | 4.21107711674603  | 4.72729734791295  |
| C | -2.30367035556098 | 2.79432315125941  | 1.21733932262709  |
| O | -3.04957947228902 | 1.95252594097025  | 0.92670217544827  |
| C | -2.23982879427677 | 5.67916354037044  | 1.16801632932931  |
| O | -2.99441034641631 | 6.51561701113321  | 0.89542660608433  |
| C | -0.27797524160443 | 4.11447820979630  | -0.21864680711676 |
| O | 0.08215795601956  | 4.02295394341902  | -1.32256951097958 |
| C | 0.71421797807366  | 0.75682349273904  | 0.17689431062733  |
| H | 1.69321786015297  | 0.71988044098586  | -0.26607250281350 |
| H | 0.18781470806959  | 1.68774958715267  | 0.20712337572127  |
| C | -1.47746404631340 | 0.19330522192303  | -1.93888008111641 |
| H | -1.42443909824772 | -0.80588670976730 | -1.51021359288102 |
| H | -2.09070845850092 | 0.79739728374772  | -1.27719623982598 |
| H | -1.97610986631591 | 0.12897233854812  | -2.90882749148355 |
| N | -0.13670652189402 | 0.76077377576596  | -2.00660097661179 |
| H | 0.43903264632329  | 0.27880426304192  | -2.68414207913152 |
| H | -0.15439355546756 | 1.74085867736712  | -2.25800451114259 |

**8**

E = -190.579322430401 au

ZPE = 0.12439328 au

 $G_{\text{corr}} = 0.09659572$  au

|   |                   |                   |                   |
|---|-------------------|-------------------|-------------------|
| N | 0.32578899973715  | -0.44522599421649 | 0.45687312618640  |
| H | -0.33762728285857 | -0.43655605669543 | 1.21181399354815  |
| H | 1.17060306508135  | -0.92428035086337 | 0.71674876081891  |
| C | 0.48996617887501  | 0.75544215617424  | -0.23650853271206 |
| H | 1.52838642271527  | 1.05096524287050  | -0.36460120016316 |
| H | -0.07712890121033 | 1.58868390684550  | 0.16998378868189  |

|   |                   |                   |                   |
|---|-------------------|-------------------|-------------------|
| C | -1.51888574464006 | 0.35337990186528  | -1.77620943965354 |
| H | -1.74258764913465 | -0.52712717384415 | -1.18649863910304 |
| H | -2.04023949745592 | 1.21800391309711  | -1.38050846543498 |
| H | -1.80273405030325 | 0.19049111662782  | -2.81005184228123 |
| N | -0.05090855796984 | 0.60073746806660  | -1.69899972897393 |
| H | 0.44404931305947  | -0.18611736794585 | -2.11709121268540 |
| H | 0.19587899410438  | 1.42968788801823  | -2.23974271822801 |

**9** E = -397.972174826894 au  
ZPE = 0.04334741 au  
G<sub>corr</sub> = 0.01919221 au

|   |                   |                  |                  |
|---|-------------------|------------------|------------------|
| N | -0.32021258022485 | 1.13904389614211 | 3.17579061190115 |
| H | 0.12159243987078  | 0.46602913160567 | 3.78170893564524 |
| H | -1.24456911148950 | 1.35868773286438 | 3.50656924285857 |
| P | 0.56932955064152  | 2.51994869866455 | 2.66216636077824 |
| H | 1.48501119252861  | 2.75181355487027 | 3.74087094737937 |
| H | 1.55817252867344  | 1.85781133585302 | 1.88511429143742 |

**W-9** E = -1030.820377542090 au  
ZPE = 0.08654284 au  
G<sub>corr</sub> = 0.04306880 au

|   |                   |                  |                   |
|---|-------------------|------------------|-------------------|
| N | -0.23838971926741 | 1.11008157283290 | 3.29977682251323  |
| H | 0.33249864811898  | 0.46525970825980 | 3.82442794556304  |
| H | -1.05393592088241 | 1.38566641934061 | 3.82192947212342  |
| W | -0.97180821994265 | 4.21947866011759 | 1.74293842953554  |
| C | 0.44911856413941  | 5.58473056624967 | 2.27657164105942  |
| O | 1.25778518126657  | 6.34577123343357 | 2.58562248665932  |
| C | -1.74819152550047 | 4.30373859310276 | 3.62509650180205  |
| O | -2.18250007649316 | 4.33683191460378 | 4.69448711039780  |
| C | -2.36886294105712 | 2.82201391201140 | 1.21732956388045  |
| O | -3.16048798981125 | 2.03936971086894 | 0.92073755425577  |
| C | -2.20097761885940 | 5.69705546571451 | 1.14331973079389  |
| O | -2.90730911164079 | 6.54366552001728 | 0.80282387953034  |
| C | -0.16295035116584 | 4.09545312310953 | -0.13103009182404 |
| O | 0.30049176851942  | 4.01361442765177 | -1.18256508767111 |
| P | 0.52884849961634  | 2.39552693848343 | 2.50065247963456  |
| H | 1.62957603030392  | 2.78168969425352 | 3.31180869662508  |
| H | 1.27989428265588  | 1.69618767994887 | 1.53205586512120  |

**10** E = -190.201418384942 au  
ZPE = 0.10880507 au  
G<sub>corr</sub> = 0.08157312 au

|   |                   |                   |                  |
|---|-------------------|-------------------|------------------|
| N | 0.23271763774128  | -0.47490677766388 | 0.52147426553602 |
| H | -0.18233391689093 | -0.22042104351498 | 1.40528960973760 |

|   |                   |                   |                   |
|---|-------------------|-------------------|-------------------|
| H | 1.09194370607786  | -0.96559449124603 | 0.71951335782109  |
| C | 0.46215106188836  | 0.69268678474685  | -0.33999474922453 |
| H | 1.52417174610690  | 0.94433788194115  | -0.39065978830926 |
| H | -0.05159877744939 | 1.55449853949590  | 0.08893615359040  |
| C | -1.43196254894293 | 0.30406543224164  | -1.80915663606757 |
| H | -1.77584383017849 | -0.56783225539653 | -1.24253186965220 |
| H | -1.97646620739569 | 1.17732168278857  | -1.44645370783608 |
| H | -1.69692185173270 | 0.16811378220774  | -2.85624518287096 |
| N | -0.00251026453968 | 0.55346675593751  | -1.70225636019799 |
| H | 0.50369219531541  | -0.20176516153793 | -2.14885684252651 |

**11** E = -397.352066769894 au  
ZPE = 0.03199272 au  
G<sub>corr</sub> = 0.00809469 au

|   |                   |                  |                  |
|---|-------------------|------------------|------------------|
| P | 0.73843343317001  | 2.44132058544812 | 2.62418155499403 |
| H | 0.98873474743574  | 3.06414897510314 | 3.93078757320447 |
| N | -0.35820085596533 | 1.07844175599909 | 3.14324058953733 |
| H | 0.09928241869176  | 0.46409016864382 | 3.80769759383437 |
| H | -1.19561720333218 | 1.42602982480584 | 3.59725712842978 |

**W-11** E = -1030.271111614472 au  
ZPE = 0.07532189 au  
G<sub>corr</sub> = 0.03192412 au

|   |                   |                  |                   |
|---|-------------------|------------------|-------------------|
| P | 0.60911871619369  | 2.35988379555731 | 2.47361370818303  |
| H | 1.18130603442978  | 3.04048546859460 | 3.61419059378014  |
| N | -0.44542866632228 | 1.18117508775069 | 3.26914835573622  |
| H | 0.09664018318950  | 0.44911034788100 | 3.70888659399224  |
| H | -1.06345133668383 | 1.57667325833854 | 3.96532561127818  |
| W | -1.02216323174816 | 4.27558660728734 | 1.67113697434582  |
| C | 0.43666932618321  | 5.59407020481902 | 2.17627537531360  |
| O | 1.28827944745584  | 6.32990939676573 | 2.46486061366895  |
| C | -1.61279138723682 | 4.18120929969138 | 3.60539807882720  |
| O | -1.90246691477265 | 4.05436447772133 | 4.72548263602012  |
| C | -2.36302818269253 | 2.82598237933808 | 1.16897359434676  |
| O | -3.12453749353591 | 2.00578875126267 | 0.86737880100188  |
| C | -2.28027416439711 | 5.72016146225651 | 1.14560385616374  |
| O | -3.03262102364990 | 6.57155616007025 | 0.86739869967008  |
| C | -0.19030663685424 | 4.09270010455470 | -0.17416867961051 |
| O | 0.31116335044142  | 3.95817529811080 | -1.21257776271749 |

**10 + W-11** E = -1220.963961711267au  
ZPE = 0.19679245 au  
G<sub>corr</sub> = 0.14572650 au

|   |                   |                   |                   |
|---|-------------------|-------------------|-------------------|
| P | 0.67795034860762  | 2.41723049682439  | 2.53247537973489  |
| H | 1.23105720725150  | 2.91196304981977  | 3.75452713905380  |
| N | 0.20669701305166  | -0.27797911712800 | 0.80873779928488  |
| H | -0.39448274931735 | -0.03533537222980 | 1.62078869713456  |
| H | 0.78606992852132  | -1.09280665732631 | 0.92999596998243  |
| N | -0.34063204461055 | 1.08803652970363  | 3.17062932295365  |
| H | 0.14699117114027  | 0.56456299276737  | 3.88791161951715  |
| H | -1.20678945559677 | 1.41647060204842  | 3.57628734430013  |
| W | -0.95704727802297 | 4.23063019031936  | 1.68218526403613  |
| C | 0.52479683174465  | 5.56936534496556  | 2.13418231054337  |
| O | 1.38192686992368  | 6.30056076864995  | 2.38345179807177  |
| C | -1.59357372821305 | 4.24850895638547  | 3.62478820073883  |
| O | -1.93612835623164 | 4.21107711674603  | 4.72729734791295  |
| C | -2.30367035556098 | 2.79432315125941  | 1.21733932262709  |
| O | -3.04957947228902 | 1.95252594097025  | 0.92670217544827  |
| C | -2.23982879427677 | 5.67916354037044  | 1.16801632932931  |
| O | -2.99441034641631 | 6.51561701113321  | 0.89542660608433  |
| C | -0.27797524160443 | 4.11447820979630  | -0.21864680711676 |
| O | 0.08215795601956  | 4.02295394341902  | -1.32256951097958 |
| C | 0.71421797807366  | 0.75682349273904  | 0.17689431062733  |
| H | 1.69321786015297  | 0.71988044098586  | -0.26607250281350 |
| H | 0.18781470806959  | 1.68774958715267  | 0.20712337572127  |
| C | -1.47746404631340 | 0.19330522192303  | -1.93888008111641 |
| H | -1.42443909824772 | -0.80588670976730 | -1.51021359288102 |
| H | -2.09070845850092 | 0.79739728374772  | -1.27719623982598 |
| H | -1.97610986631591 | 0.12897233854812  | -2.90882749148355 |
| N | -0.13670652189402 | 0.76077377576596  | -2.00660097661179 |
| H | 0.43903264632329  | 0.27880426304192  | -2.68414207913152 |
| H | -0.15439355546756 | 1.74085867736712  | -2.25800451114259 |
